# Supplementary material for: Denigrins H–L: Sulfated Derivatives of Denigrins D and E from a New Zealand Dictyodendrilla c.f. dendyi Marine Sponge
Source: MDPI journal article supplement (doi:10.3390/md22050231), 2024-05-20
Supplement: s1 [file s1]

## Electronic Supplementary Information

### Marine Drugs

# Denigrins H-L: Sulfated Derivatives of Denigrins D and E from a New Zealand *Dictyodendrilla* c.f. *dendyi* Marine Sponge

Lauren Gris<sup>1</sup>, Michèle R. Prinsep<sup>1\*</sup>, Linda M. Peters<sup>2</sup> and Christopher N. Battershill<sup>3</sup>

<sup>1</sup> Chemistry and Applied Physics, School of Science, University of Waikato, Private Bag 3105, Hamilton 3240, New Zealand.

<sup>2</sup> Biomedical, Molecular and Cellular Biology, School of Science, University of Waikato, Private Bag 3105, Hamilton 3240, New Zealand.

<sup>3</sup> University of Waikato Coastal Marine Field Station, 58 Cross Road, Sulphur Point, Tauranga 3110, New Zealand.

\*Corresponding author: [michele.prinsep@waikato.ac.nz](mailto:michele.prinsep@waikato.ac.nz)

## Contents

|                                                                                                                         |    |
|-------------------------------------------------------------------------------------------------------------------------|----|
| <b>Table S1.</b> <sup>1</sup> H and <sup>13</sup> C NMR data of denigrin H (1).....                                     | 4  |
| <b>Table S2.</b> <sup>1</sup> H and <sup>13</sup> C NMR data of denigrin I (2).....                                     | 5  |
| <b>Table S3.</b> <sup>1</sup> H and <sup>13</sup> C NMR data of denigrin J (3).....                                     | 6  |
| <b>Table S4.</b> <sup>1</sup> H and <sup>13</sup> C NMR data of denigrin K (4).....                                     | 7  |
| <b>Table S5.</b> <sup>1</sup> H and <sup>13</sup> C NMR data of denigrin L (5) .....                                    | 8  |
| <b>Figure S1a.</b> <sup>1</sup> H NMR (methanol-d <sub>4</sub> , 600 MHz) spectrum of denigrin H (1) .....              | 9  |
| <b>Figure S1b.</b> <sup>13</sup> C NMR (methanol-d <sub>4</sub> , 150 MHz) spectrum of denigrin H (1) .....             | 10 |
| <b>Figure S1c.</b> <sup>13</sup> C NMR (methanol-d <sub>4</sub> , 150 MHz) spectrum expansion 1 of denigrin H (1) ..... | 11 |
| <b>Figure S1d.</b> <sup>13</sup> C NMR (methanol-d <sub>4</sub> , 150 MHz) spectrum expansion 2 of denigrin H (1) ..... | 12 |
| <b>Figure S1e.</b> COSY (methanol-d <sub>4</sub> ) spectrum of denigrin H (1) .....                                     | 13 |
| <b>Figure S1f.</b> COSY (methanol-d <sub>4</sub> ) spectrum of denigrin H (1) .....                                     | 14 |
| <b>Figure S1g.</b> gHSQC (methanol-d <sub>4</sub> ) spectrum of denigrin H (1) .....                                    | 15 |
| <b>Figure S1h.</b> gHMBC (methanol-d <sub>4</sub> ) spectrum of denigrin H (1) .....                                    | 16 |
| <b>Figure S1i.</b> gHMBC (methanol-d <sub>4</sub> ) spectrum expansion of denigrin H (1) .....                          | 17 |

|                                                                                                                          |    |
|--------------------------------------------------------------------------------------------------------------------------|----|
| <b>Figure S1j.</b> HRESIMS spectrum of denigrin H ( <b>1</b> ) in negative ion mode.....                                 | 18 |
| <b>Figure S2a.</b> $^1\text{H}$ NMR (methanol- $d_4$ , 600 MHz) spectrum of denigrin I ( <b>2</b> ) .....                | 19 |
| <b>Figure S2b.</b> $^{13}\text{C}$ NMR (methanol- $d_4$ , 150 MHz) spectrum of denigrin I ( <b>2</b> ) .....             | 20 |
| <b>Figure S2c.</b> $^{13}\text{C}$ NMR (methanol- $d_4$ , 150 MHz) spectrum expansion of denigrin I ( <b>2</b> ).....    | 21 |
| <b>Figure S2d.</b> COSY (methanol- $d_4$ ) spectrum of denigrin I ( <b>2</b> ) .....                                     | 22 |
| <b>Figure S2e.</b> gHSQC (methanol- $d_4$ ) spectrum of denigrin I ( <b>2</b> ).....                                     | 23 |
| <b>Figure S2f.</b> gHMBC (methanol- $d_4$ ) spectrum of denigrin I ( <b>2</b> ).....                                     | 24 |
| <b>Figure S2g.</b> gHMBC (methanol- $d_4$ ) spectrum expansion of denigrin I ( <b>2</b> ) .....                          | 25 |
| <b>Figure S2h.</b> HRESIMS spectrum of denigrin I ( <b>2</b> ) in negative ion mode.....                                 | 26 |
| <b>Figure S3a.</b> $^1\text{H}$ NMR (methanol- $d_4$ , 600 MHz) spectrum of denigrin J ( <b>3</b> ) .....                | 27 |
| <b>Figure S3b.</b> $^{13}\text{C}$ NMR (methanol- $d_4$ , 150 MHz) spectrum of denigrin J ( <b>3</b> ) .....             | 28 |
| <b>Figure S3c.</b> $^{13}\text{C}$ NMR (methanol- $d_4$ , 150 MHz) spectrum expansion of denigrin J ( <b>3</b> ).....    | 29 |
| <b>Figure S3d.</b> COSY (methanol- $d_4$ ) spectrum of denigrin J ( <b>3</b> ) .....                                     | 30 |
| <b>Figure S3e.</b> gHSQC (methanol- $d_4$ ) spectrum of denigrin J ( <b>3</b> ).....                                     | 31 |
| <b>Figure S3f.</b> gHMBC (methanol- $d_4$ ) spectrum of denigrin J ( <b>3</b> ).....                                     | 32 |
| <b>Figure S3g.</b> gHMBC (methanol- $d_4$ ) spectrum expansion of denigrin J ( <b>3</b> ) .....                          | 33 |
| <b>Figure S3h.</b> HRESIMS spectrum of denigrin J ( <b>3</b> ) in negative ion mode.....                                 | 34 |
| <b>Figure S4a.</b> $^1\text{H}$ NMR (methanol- $d_4$ , 600 MHz) spectrum of denigrin K ( <b>4</b> ).....                 | 35 |
| <b>Figure S4b.</b> $^{13}\text{C}$ NMR (methanol- $d_4$ , 150 MHz) spectrum of denigrin K ( <b>4</b> ) .....             | 36 |
| <b>Figure S4c.</b> $^{13}\text{C}$ NMR (methanol- $d_4$ , 150 MHz) spectrum expansion 1 of denigrin K ( <b>4</b> ) ..... | 37 |
| <b>Figure S4d.</b> $^{13}\text{C}$ NMR (methanol- $d_4$ , 150 MHz) spectrum expansion 2 of denigrin K ( <b>4</b> ).....  | 38 |
| <b>Figure S4e.</b> COSY (methanol- $d_4$ ) spectrum of denigrin K ( <b>4</b> ) .....                                     | 39 |
| <b>Figure S4f.</b> gHSQC (methanol- $d_4$ ) spectrum of denigrin K ( <b>4</b> ) .....                                    | 40 |
| <b>Figure S4g.</b> gHMBC (methanol- $d_4$ ) spectrum of denigrin K ( <b>4</b> ) .....                                    | 41 |
| <b>Figure S4h.</b> gHMBC (methanol- $d_4$ ) spectrum expansion of denigrin K ( <b>4</b> ) .....                          | 42 |
| <b>Figure S4i.</b> HRESIMS spectrum of denigrin K ( <b>4</b> ) in negative ion mode.....                                 | 43 |
| <b>Figure S5a.</b> $^1\text{H}$ NMR (methanol- $d_4$ , 600 MHz) spectrum of denigrin L ( <b>5</b> ).....                 | 44 |
| <b>Figure S5b.</b> $^{13}\text{C}$ NMR (methanol- $d_4$ , 150 MHz) spectrum of denigrin L ( <b>5</b> ).....              | 45 |
| <b>Figure S5c.</b> $^{13}\text{C}$ NMR (methanol- $d_4$ , 150 MHz) spectrum expansion of denigrin L ( <b>5</b> ) .....   | 46 |
| <b>Figure S5d.</b> COSY (methanol- $d_4$ ) spectrum of denigrin L ( <b>5</b> ).....                                      | 47 |
| <b>Figure S5e.</b> gHSQC (methanol- $d_4$ ) spectrum of denigrin L ( <b>5</b> ).....                                     | 48 |
| <b>Figure S5f.</b> gHMBC (methanol- $d_4$ ) spectrum of denigrin L ( <b>5</b> ) .....                                    | 49 |
| <b>Figure S5g.</b> gHMBC (methanol- $d_4$ ) spectrum expansion of denigrin L ( <b>5</b> ).....                           | 50 |

|                                                                                                                                                             |    |
|-------------------------------------------------------------------------------------------------------------------------------------------------------------|----|
| <b>Figure S5h.</b> HRESIMS spectrum of denigrin L ( <b>5</b> ) in negative ion mode .....                                                                   | 51 |
| <b>Figure S6a.</b> <sup>1</sup> H NMR (methanol- <i>d</i> <sub>4</sub> , 600 MHz) spectrum of denigrin E ( <b>6</b> ).....                                  | 52 |
| <b>Figure S6b.</b> <sup>13</sup> C NMR (methanol- <i>d</i> <sub>4</sub> , 150 MHz) spectrum of denigrin E ( <b>6</b> ).....                                 | 53 |
| <b>Figure S6c.</b> <sup>13</sup> C NMR (methanol- <i>d</i> <sub>4</sub> , 150 MHz) spectrum expansion of denigrin E ( <b>6</b> ).....                       | 54 |
| <b>Figure S7.</b> <sup>1</sup> H NMR (methanol- <i>d</i> <sub>4</sub> , 600 MHz) spectrum of dictyodendrin C.....                                           | 55 |
| <b>Figure S8.</b> <sup>1</sup> H NMR (methanol- <i>d</i> <sub>4</sub> , 600 MHz) spectrum of dictyodendrin D .....                                          | 56 |
| <b>Figure S9.</b> <sup>1</sup> H NMR (methanol- <i>d</i> <sub>4</sub> , 600 MHz) spectrum of dictyodendrin F .....                                          | 57 |
| <b>Figure S10.</b> <sup>1</sup> H NMR (methanol- <i>d</i> <sub>4</sub> , 600 MHz) spectrum of dactylpyrrole A.....                                          | 58 |
| <b>Figure S11.</b> <sup>1</sup> H NMR (methanol- <i>d</i> <sub>4</sub> , 600 MHz) spectrum of lamellarin O1 .....                                           | 59 |
| <b>Table S6.</b> Cytotoxicity assay - IC <sub>50</sub> values for compounds <b>1-6</b> , dictyodendrin C, D, and F, dactylpyrrole A and lamellarin O1 ..... | 60 |

**Table S1.**  $^1\text{H}$  and  $^{13}\text{C}$  NMR data of denigrin H (**1**)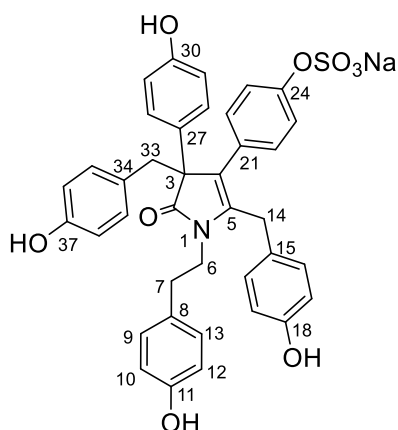

| No.   | $\delta_{\text{C}}^{\text{a}}$ | $^1\text{H}$<br>$\delta_{\text{H}}$ , (mult, $J$ in Hz) <sup>b</sup> | HMBC ( $^1\text{H}$ to $^{13}\text{C}$ )           | COSY            |
|-------|--------------------------------|----------------------------------------------------------------------|----------------------------------------------------|-----------------|
| 2     | 183.6                          |                                                                      |                                                    |                 |
| 3     | 62.3                           |                                                                      |                                                    |                 |
| 4     | 124.8                          |                                                                      |                                                    |                 |
| 5     | 139.9                          |                                                                      |                                                    |                 |
| 6     | 44.4                           | 3.41 (1H, m)<br>3.11 <sup>c</sup> (1H, m)                            | C-2                                                | H-6, H-7<br>H-7 |
| 7     | 34.9                           | 2.70 (1H, m)<br>2.19 (1H, m)                                         | C-6, C-9/13<br>C-8, C-9/13                         | H-7             |
| 8     | 130.8                          |                                                                      |                                                    |                 |
| 9/13  | 130.9                          | 6.712 <sup>d</sup> (2H, d, 8.5)                                      | C-7, C-11                                          | H-9/13          |
| 10/12 | 116.2                          | 6.65 (2H, d, 8.5)                                                    | C-8                                                |                 |
| 11    | 157.1                          |                                                                      |                                                    |                 |
| 14    | 31.0                           | 3.77 (1H, d, 17.0)<br>3.28 <sup>e</sup> (1H, m)                      | C-5, C-15, C-16/20<br>C-4, C-5, C-15, C-16/20      | H-14            |
| 15    | 128.2                          |                                                                      |                                                    |                 |
| 16/20 | 130.1                          | 6.34 (2H, d, 8.4)                                                    | C-14, C-18                                         |                 |
| 17/19 | 116.9                          | 6.705 <sup>d</sup> (2H, d, 8.6)                                      | C-15                                               | H-16/20         |
| 18    | 157.3                          |                                                                      |                                                    |                 |
| 21    | 131.7                          |                                                                      |                                                    |                 |
| 22/26 | 130.0                          | 6.79 (2H, d, 8.9)                                                    | C-4, C-24                                          |                 |
| 23/25 | 122.1                          | 7.07 (2H, d, 8.9)                                                    | C-24, C-21                                         | H-22/26         |
| 24    | 152.8                          |                                                                      |                                                    |                 |
| 27    | 132.0                          |                                                                      |                                                    |                 |
| 28/32 | 129.0                          | 7.25 (2H, d, 8.8)                                                    | C-3, C-30                                          | H-29/31         |
| 29/31 | 116.8                          | 6.87 (2H, d, 8.8)                                                    | C-27                                               |                 |
| 30    | 158.1                          |                                                                      |                                                    |                 |
| 33    | 38.5                           | 3.64 (1H, d, 12.9)<br>3.09 <sup>c</sup> (1H, d (12.7))               | C-3, C-4, C-34, C-35/39<br>C-2, C-3, C-34, C-35/39 | H-33            |
| 34    | 128.4                          |                                                                      |                                                    |                 |
| 35/39 | 132.5                          | 6.72 (2H, d, 8.7)                                                    | C-33, C-37                                         | H-36/38         |
| 36/38 | 115.8                          | 6.64 (2H, d, 8.6)                                                    | C-34                                               |                 |
| 37    | 157.6                          |                                                                      |                                                    |                 |

<sup>a</sup> recorded at 150 MHz in  $\text{CD}_3\text{OD}$ , <sup>b</sup> recorded at 600 MHz in  $\text{CD}_3\text{OD}$ , <sup>c</sup> signal overlap, <sup>d</sup> values given to 3 decimal places to separate signals, <sup>e</sup> signal partially obscured

**Table S2.**  $^1\text{H}$  and  $^{13}\text{C}$  NMR data of denigrin I (**2**)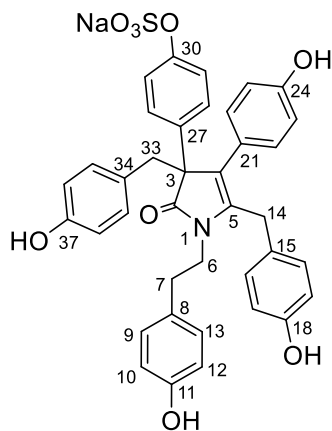

| No.          | $\delta_{\text{C}}^{\text{a}}$ | $^1\text{H}$<br>$\delta_{\text{H}}$ , (mult, $J$ in Hz) <sup>b</sup> | HMBC ( $^1\text{H}$ to $^{13}\text{C}$ )           | COSY            |
|--------------|--------------------------------|----------------------------------------------------------------------|----------------------------------------------------|-----------------|
| <b>2</b>     | 182.9                          |                                                                      |                                                    |                 |
| <b>3</b>     | 62.4                           |                                                                      |                                                    |                 |
| <b>4</b>     | 124.9                          |                                                                      |                                                    |                 |
| <b>5</b>     | 138.7                          |                                                                      |                                                    |                 |
| <b>6</b>     | 44.3                           | 3.41 (1H, m)<br>3.08 <sup>c</sup> (1H, m)                            | C-2                                                | H-6, H-7<br>H-7 |
| <b>7</b>     | 34.9                           | 2.69 (1H, m)<br>2.18 (1H, ddd)                                       | C-9/13<br>C-6, C-9/13                              | H-7             |
| <b>8</b>     | 130.6                          |                                                                      |                                                    |                 |
| <b>9/13</b>  | 131.0                          | 6.706 <sup>d</sup> (2H, d, 8.4)                                      | C-7, C-11                                          | H-9/13          |
| <b>10/12</b> | 116.2                          | 6.65 (2H, d, 8.6)                                                    | C-8                                                |                 |
| <b>11</b>    | 157.1                          |                                                                      |                                                    |                 |
| <b>14</b>    | 31.1                           | 3.79 (1H, d, 16.9)<br>3.29 <sup>e</sup> (1H, m)                      | C-5, C-15, C-16/20<br>C-4, C-5, C-15, C-16/20      | H-14            |
| <b>15</b>    | 128.40 <sup>f, g</sup>         |                                                                      |                                                    |                 |
| <b>16/20</b> | 130.1                          | 6.34 (2H, d, 8.3)                                                    | C-14, C-18                                         |                 |
| <b>17/19</b> | 116.8                          | 6.714 <sup>d</sup> (2H, d, 8.4)                                      | C-15                                               | H-16/20         |
| <b>18</b>    | 157.2                          |                                                                      |                                                    |                 |
| <b>21</b>    | 126.1                          |                                                                      |                                                    |                 |
| <b>22/26</b> | 130.3                          | 6.66 (2H, d, 8.9)                                                    | C-4, C-24                                          | H-22/26         |
| <b>23/25</b> | 116.0                          | 6.56 (2H, d, 8.7)                                                    | C-21, C-24                                         |                 |
| <b>24</b>    | 157.63 <sup>g</sup>            |                                                                      |                                                    |                 |
| <b>27</b>    | 137.9                          |                                                                      |                                                    |                 |
| <b>28/32</b> | 128.8                          | 7.42 (2H, d, 9.1)                                                    | C-3, C-30                                          | H-29/31         |
| <b>29/31</b> | 122.8                          | 7.39 (2H, d, 9.0)                                                    | C-27, C-30                                         |                 |
| <b>30</b>    | 153.5                          |                                                                      |                                                    |                 |
| <b>33</b>    | 38.6                           | 3.68 (1H, d, 12.9)<br>3.09 <sup>c</sup> (1H, d, 12.7)                | C-3, C-4, C-34, C-35/39<br>C-2, C-3, C-35/39, C-34 | H-33            |
| <b>34</b>    | 128.41 <sup>f, g</sup>         |                                                                      |                                                    |                 |
| <b>35/39</b> | 132.6                          | 6.68 (2H, d, 8.6)                                                    | C-33                                               | H-36/38         |
| <b>36/38</b> | 115.7                          | 6.63 (2H, d, 8.7)                                                    | C-34, C-37                                         |                 |
| <b>37</b>    | 157.58 <sup>g</sup>            |                                                                      |                                                    |                 |

<sup>a</sup> recorded at 150 MHz in  $\text{CD}_3\text{OD}$ , <sup>b</sup> recorded at 600 MHz in  $\text{CD}_3\text{OD}$ , <sup>c</sup> signal overlap, <sup>d</sup> values given to 3 decimal places to separate signals, <sup>e</sup> signal partially obscured, <sup>f</sup> assignment interchangeable, <sup>g</sup> values given to 2 decimal places to separate signals

**Table S3.**  $^1\text{H}$  and  $^{13}\text{C}$  NMR data of denigrin J (**3**)

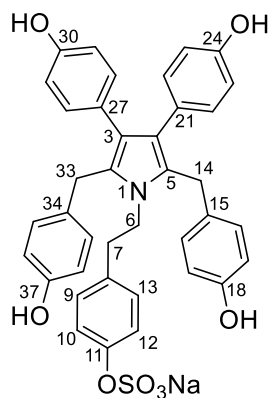

| No.                | $\delta_{\text{C}}$ <sup>a</sup> | $^1\text{H}$<br>$\delta_{\text{H}}$ , (mult, <i>J</i> in Hz) <sup>b</sup> | HMBC ( $^1\text{H}$ to $^{13}\text{C}$ ) | COSY         |
|--------------------|----------------------------------|---------------------------------------------------------------------------|------------------------------------------|--------------|
| <b>2/5</b>         | 128.3                            |                                                                           |                                          |              |
| <b>3/4</b>         | 123.4                            |                                                                           |                                          |              |
| <b>6</b>           | 47.1                             | 3.59 (2H, m)                                                              | C-7, C-2/5                               | H-7          |
| <b>7</b>           | 37.7                             | 2.45 (2H, m)                                                              | C-6, C-9/13, C-8                         |              |
| <b>8</b>           | 136.6                            |                                                                           |                                          |              |
| <b>9/13</b>        | 130.6                            | 6.78 (2H, d, 8.5)                                                         | C-7, C-11                                |              |
| <b>10/12</b>       | 122.5                            | 7.13 (2H, d 8.4)                                                          | C-8, C-11                                | H-9/13       |
| <b>11</b>          | 152.6                            |                                                                           |                                          |              |
| <b>14/33</b>       | 30.7                             | 3.85 (4H, s)                                                              | C-3/4, C-2/5, C-16/20–35/39, C-15/34     |              |
| <b>15/34</b>       | 132.8                            |                                                                           |                                          |              |
| <b>16/20–35/39</b> | 130.0                            | 6.93 (4H, d, 8.6)                                                         | C-14/33, C-18/37                         | H16/20-35/39 |
| <b>17/19–36/38</b> | 116.3                            | 6.69 (4H, d, 8.5)                                                         | C-15/34, C-18/37                         |              |
| <b>18/37</b>       | 156.7                            |                                                                           |                                          |              |
| <b>21/27</b>       | 129.7                            |                                                                           |                                          |              |
| <b>22/26–28/32</b> | 132.5                            | 6.92 (4H, d, 8.6)                                                         | C-3/5, C-24/30                           | H23/25-29/31 |
| <b>23/25–29/31</b> | 115.6                            | 6.61 (4H, d, 8.7)                                                         | C-21/27, C-24/30                         |              |
| <b>24/30</b>       | 156.1                            |                                                                           |                                          |              |

<sup>a</sup> recorded at 150 MHz in  $\text{CD}_3\text{OD}$ , <sup>b</sup> recorded at 600 MHz in  $\text{CD}_3\text{OD}$

**Table S4.** <sup>1</sup>H and <sup>13</sup>C NMR data of denigrin K (**4**)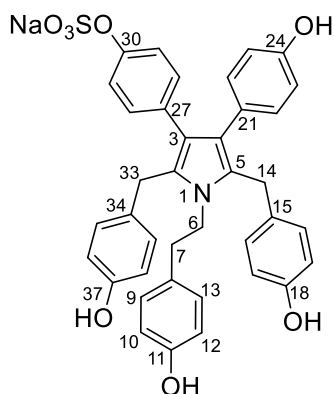

| No.   | $\delta_c^a$           | <sup>1</sup> H<br>$\delta_H$ (mult, <i>J</i> in Hz) <sup>b</sup> | HMBC ( <sup>1</sup> H to <sup>13</sup> C)           | COSY    |
|-------|------------------------|------------------------------------------------------------------|-----------------------------------------------------|---------|
| 2     | 128.73 <sup>c, d</sup> |                                                                  |                                                     |         |
| 3     | 122.9                  |                                                                  |                                                     |         |
| 4     | 123.4                  |                                                                  |                                                     |         |
| 5     | 128.68 <sup>c, d</sup> |                                                                  |                                                     |         |
| 6     | 47.3                   | 3.58 (2H, m)                                                     | C-2, C-7, C-5                                       | H-7     |
| 7     | 37.6                   | 2.45 (2H, m)                                                     | C-6, C-9/13                                         |         |
| 8     | 130.94 <sup>c</sup>    |                                                                  |                                                     |         |
| 9/13  | 130.92 <sup>c</sup>    | 6.66 (2H, d, 9.0)                                                | C-7, C-11                                           |         |
| 10/12 | 116.1                  | 6.63 (2H, d, 8.3)                                                | C-8, C-11                                           |         |
| 11    | 157.0                  |                                                                  |                                                     |         |
| 14/33 | 30.57<br>30.63         | 3.80 (4H, s)                                                     | C-2, C-3, C-4, C-5, C-15,<br>C-16/20, C-35/39, C-34 |         |
| 15    | 132.7 <sup>e</sup>     |                                                                  |                                                     |         |
| 16/20 | 129.92 <sup>c, f</sup> | 6.89 <sup>g</sup> (2H, d, 8.3)                                   | C-14/33, C-18                                       | H17/19  |
| 17/19 | 116.32 <sup>c, h</sup> | 6.70 <sup>i</sup> (2H, d, 9.0)                                   | C-15, C-18                                          |         |
| 18    | 156.68 <sup>c, j</sup> |                                                                  |                                                     |         |
| 21    | 129.4                  |                                                                  |                                                     |         |
| 22/26 | 132.5                  | 6.92 (2H, d 9.0)                                                 | C-4, C-24                                           | H-23/25 |
| 23/25 | 115.7                  | 6.62 (2H, d, 8.3)                                                | C-21, C-24                                          |         |
| 24    | 156.2                  |                                                                  |                                                     |         |
| 27    | 135.2                  |                                                                  |                                                     |         |
| 28/32 | 132.0                  | 7.06 (2H, d, 8.6)                                                | C-3, C-30                                           |         |
| 29/31 | 121.9                  | 7.12 (2H, d, 8.3)                                                | C-27, C-30                                          | H-28/32 |
| 30    | 151.6                  |                                                                  |                                                     |         |
| 34    | 132.8 <sup>e</sup>     |                                                                  |                                                     |         |
| 35/39 | 129.87 <sup>c, f</sup> | 6.91 <sup>g</sup> (2H, d, 8.3)                                   | C-14/33, C-37                                       | H-36/38 |
| 36/38 | 116.30 <sup>c, h</sup> | 6.69 <sup>i</sup> (2H, d, 8.3)                                   | C-14/33, C-34, C-37                                 |         |
| 37    | 156.70 <sup>c, j</sup> |                                                                  |                                                     |         |

<sup>a</sup> recorded at 150 MHz in CD<sub>3</sub>OD, <sup>b</sup> recorded at 600 MHz in CD<sub>3</sub>OD, <sup>c</sup> values given to 2 decimal places to separate signals, <sup>d-j</sup> assignment may be interchanged

**Table S5.**  $^1\text{H}$  and  $^{13}\text{C}$  NMR data of denigrin L (**5**)

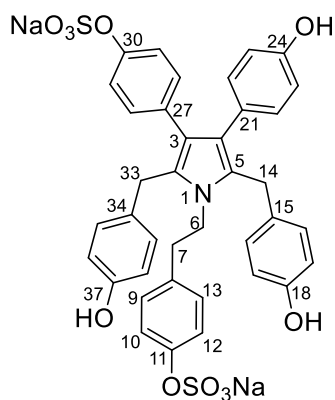

| No.          | $\delta_{\text{C}}^{\text{a}}$ | $^1\text{H}$<br>$\delta_{\text{H}}$ (mult, $J$ in Hz) $^{\text{b}}$ | HMBC ( $^1\text{H}$ to $^{13}\text{C}$ ) | COSY    |
|--------------|--------------------------------|---------------------------------------------------------------------|------------------------------------------|---------|
| <b>2</b>     | 128.6 $^{\text{c}}$            |                                                                     |                                          |         |
| <b>3</b>     | 123.0                          |                                                                     |                                          |         |
| <b>4</b>     | 123.5                          |                                                                     |                                          |         |
| <b>5</b>     | 128.7 $^{\text{c}}$            |                                                                     |                                          |         |
| <b>6</b>     | 47.2                           | 3.61 (2H, m)                                                        | C-2, C-5                                 | H-7     |
| <b>7</b>     | 37.6                           | 2.45 (2H, m)                                                        | C-9/13, C-8                              |         |
| <b>8</b>     | 136.5                          |                                                                     |                                          |         |
| <b>9/13</b>  | 130.4                          | 6.80 (2H, d, 8.6)                                                   | C-7, C-11                                |         |
| <b>10/12</b> | 122.5                          | 7.14 $^{\text{d}}$ (2H, d, 8.6)                                     | C-7, C-8                                 | H-9/13  |
| <b>11</b>    | 152.5                          |                                                                     |                                          |         |
| <b>14</b>    | 30.7                           | 3.94 (2H, s)                                                        | C-2, C-3, C-15                           |         |
| <b>15</b>    | 132.7 $^{\text{e, f}}$         |                                                                     |                                          |         |
| <b>16/20</b> | 130.00 $^{\text{g, h}}$        | 6.95 $^{\text{i}}$ (2H, d, 8.6)                                     | C-18                                     | C-17-19 |
| <b>17/19</b> | 116.41 $^{\text{g, j}}$        | 6.710 $^{\text{k, l}}$ (2H, d, 8.6)                                 | C-15, C-18                               |         |
| <b>18</b>    | 156.83 $^{\text{g, m}}$        |                                                                     |                                          |         |
| <b>21</b>    | 129.3                          |                                                                     |                                          |         |
| <b>22/26</b> | 132.6 $^{\text{e}}$            | 6.95 $^{\text{h}}$ (2H, d, 8.6)                                     | C-4, C-24                                | C-23/25 |
| <b>23/25</b> | 115.8                          | 6.63 (2H, d, 8.7)                                                   | C-21, C-24                               |         |
| <b>24</b>    | 156.3                          |                                                                     |                                          |         |
| <b>27</b>    | 135.1 $^{\text{f}}$            |                                                                     |                                          |         |
| <b>28/32</b> | 132.0                          | 7.09 (2H, d, 8.8)                                                   | C-3, C-30                                |         |
| <b>29/31</b> | 121.9                          | 7.14 $^{\text{d}}$ (2H, d, 8.6)                                     | C-30                                     | H-28/32 |
| <b>30</b>    | 151.7                          |                                                                     |                                          |         |
| <b>33</b>    | 30.7                           | 3.87 (2H, s)                                                        | C-4, C-5, C-34                           |         |
| <b>34</b>    | 132.6 $^{\text{e, f}}$         |                                                                     |                                          |         |
| <b>35/39</b> | 129.96 $^{\text{g, h}}$        | 6.95 $^{\text{i}}$ (2H, d, 8.6)                                     | C-37                                     | C-36/38 |
| <b>36/38</b> | 116.37 $^{\text{g, j}}$        | 6.708 $^{\text{k, l}}$ (2H, d, 8.6)                                 | C-34, C37                                |         |
| <b>37</b>    | 156.78 $^{\text{g, m}}$        |                                                                     |                                          |         |

$^{\text{a}}$  recorded at 150 MHz in  $\text{CD}_3\text{OD}$ ,  $^{\text{b}}$  recorded at 600 MHz in  $\text{CD}_3\text{OD}$ ,  $^{\text{c-e, h-j, l-m}}$  assignment may be interchanged,  $^{\text{f}}$  assigned based on denigrin J (**3**) and K (**4**),  $^{\text{g}}$  values given to 2 decimal places to separate signals,  $^{\text{k}}$  values given to 3 decimal places to separate signals

**Figure S1a.**  $^1\text{H}$  NMR (methanol- $d_4$ , 600 MHz) spectrum of denigrin H (**1**)

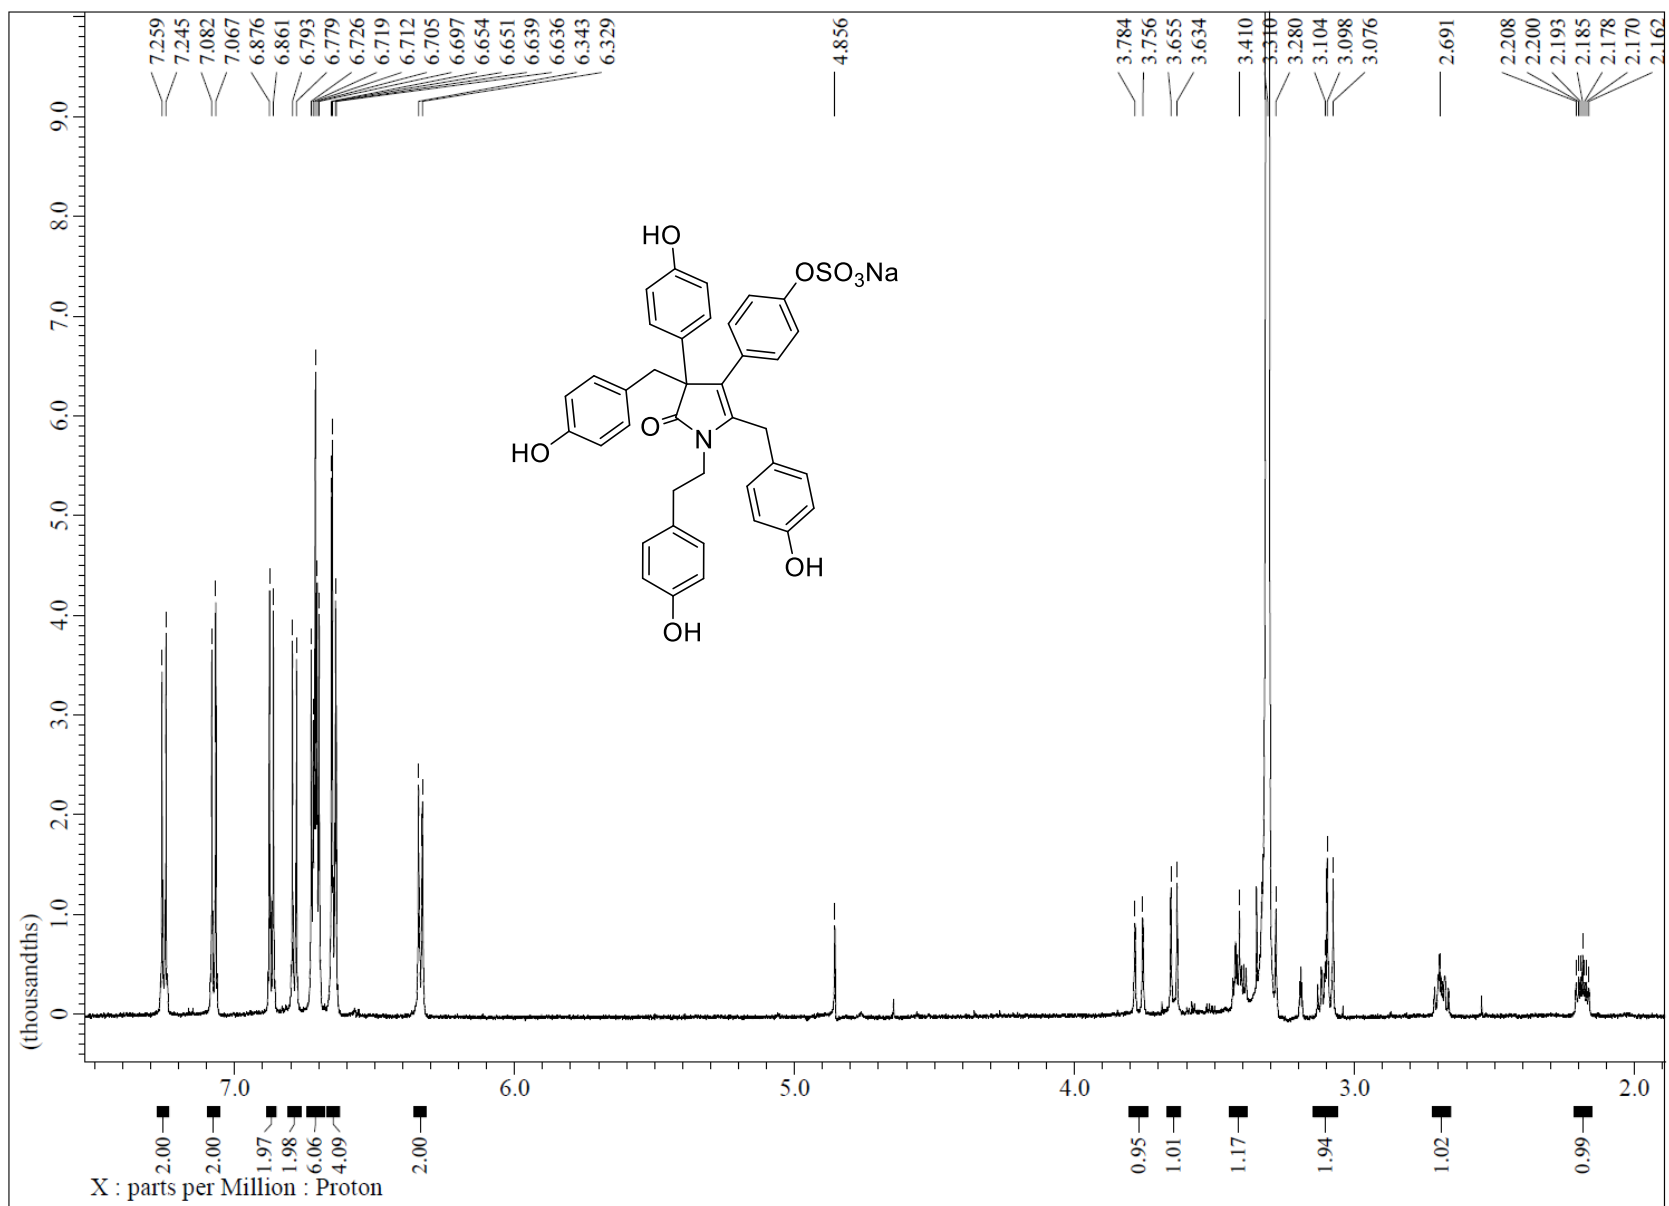

**Figure S1b.**  $^{13}\text{C}$  NMR (methanol- $d_4$ , 150 MHz) spectrum of denigrin H (**1**)

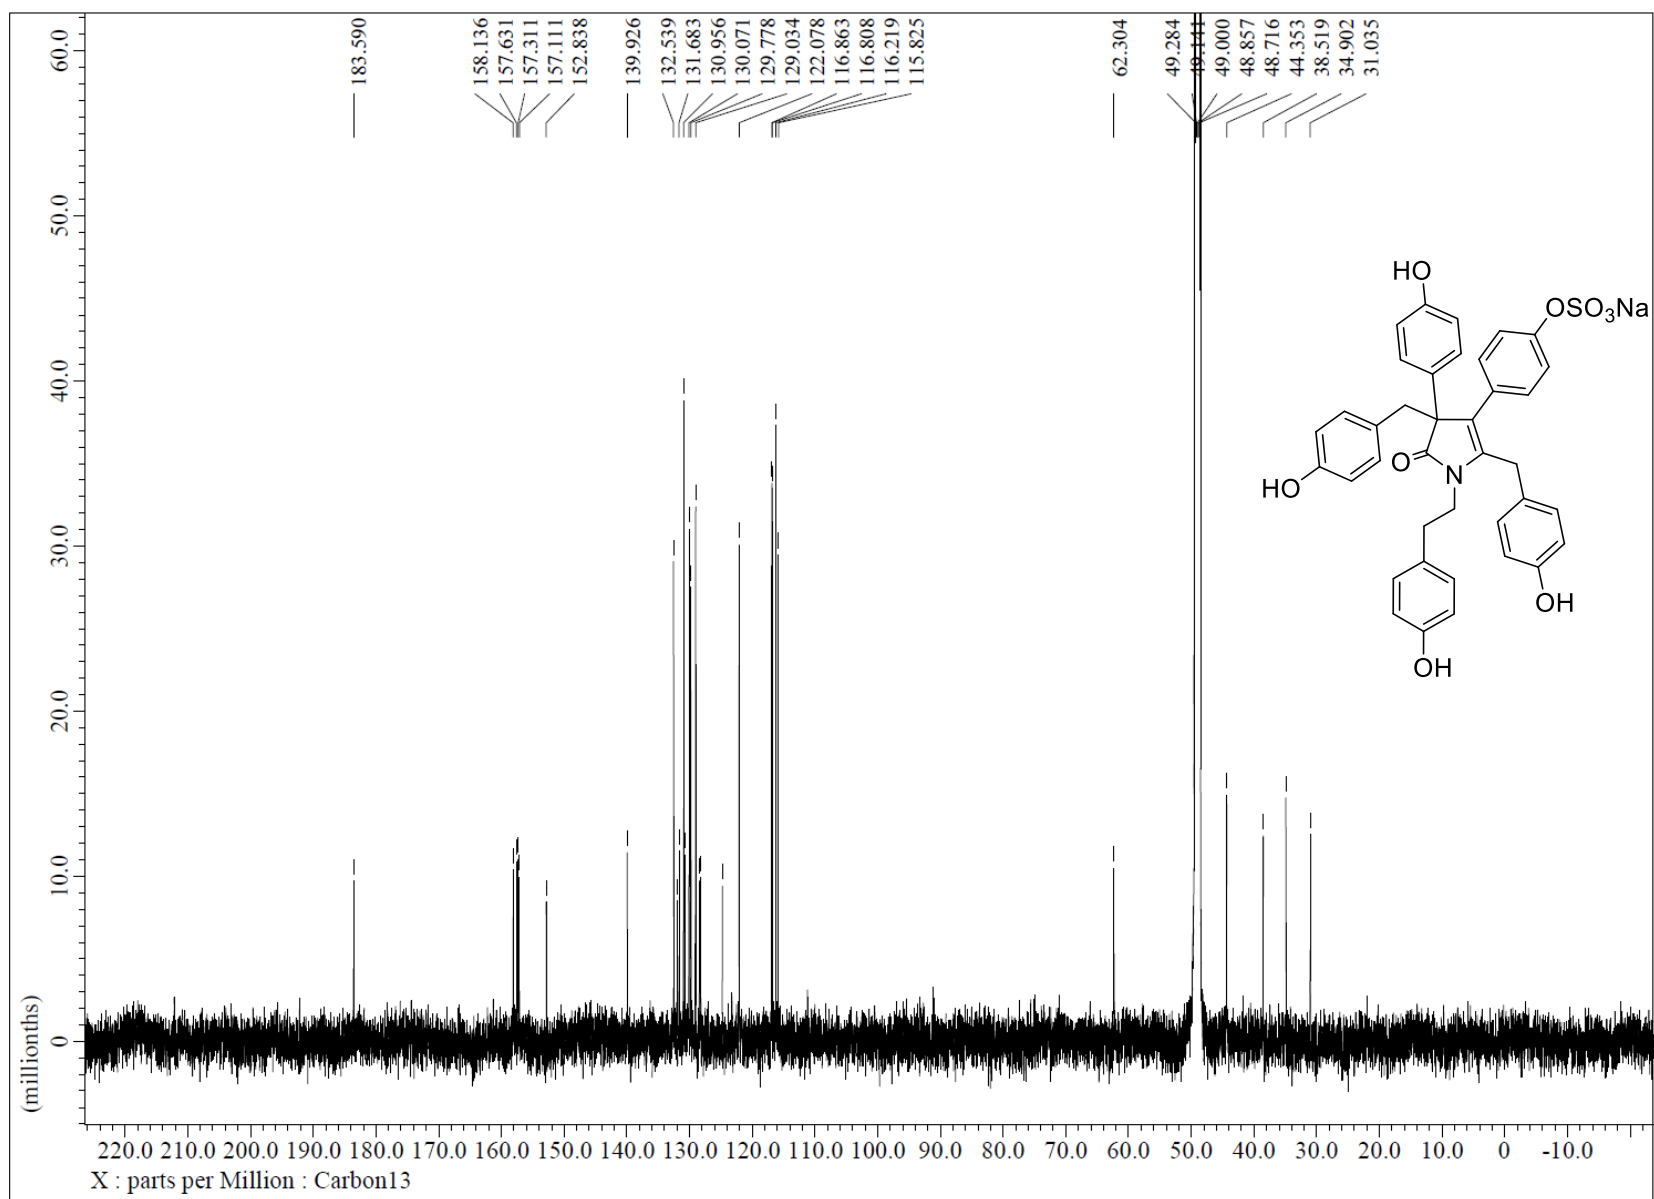

**Figure S1c.**  $^{13}\text{C}$  NMR (methanol- $d_4$ , 150 MHz) spectrum expansion 1 of denigrin H (**1**)

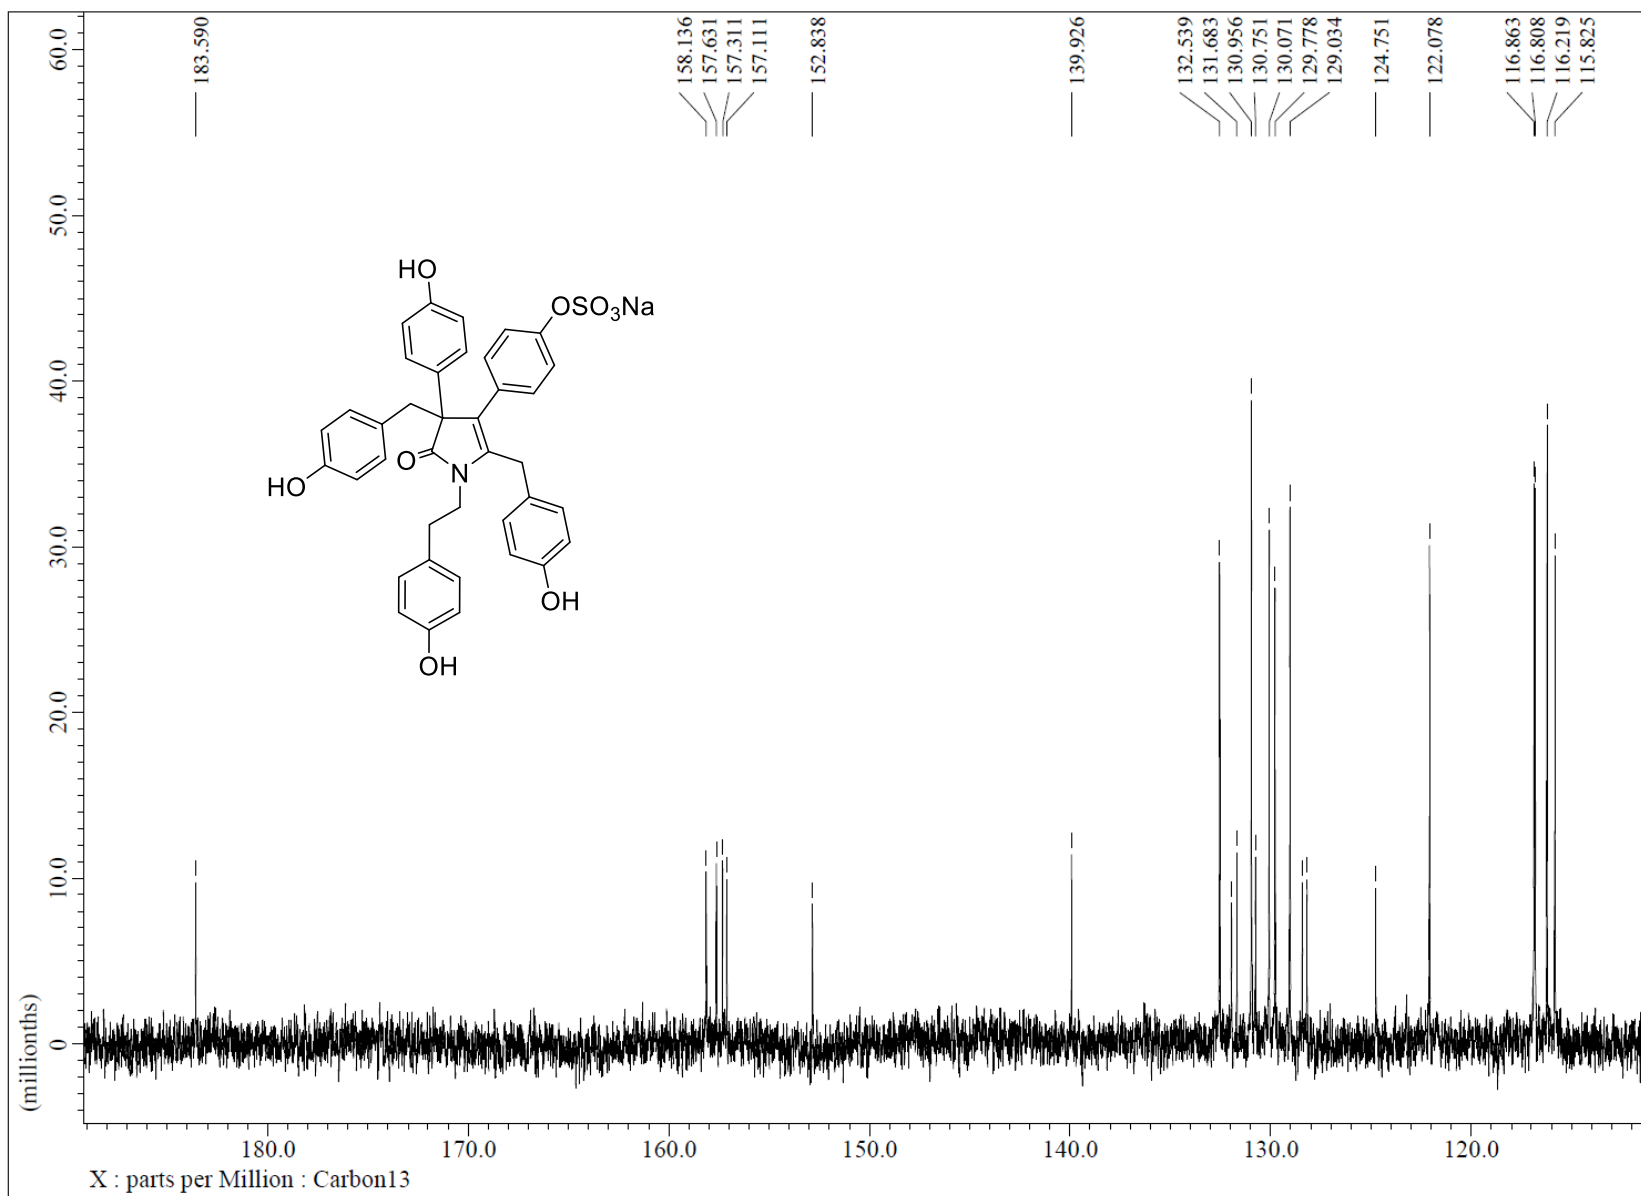

**Figure S1d.**  $^{13}\text{C}$  NMR (methanol- $d_4$ , 150 MHz) spectrum expansion 2 of denigrin H (**1**)

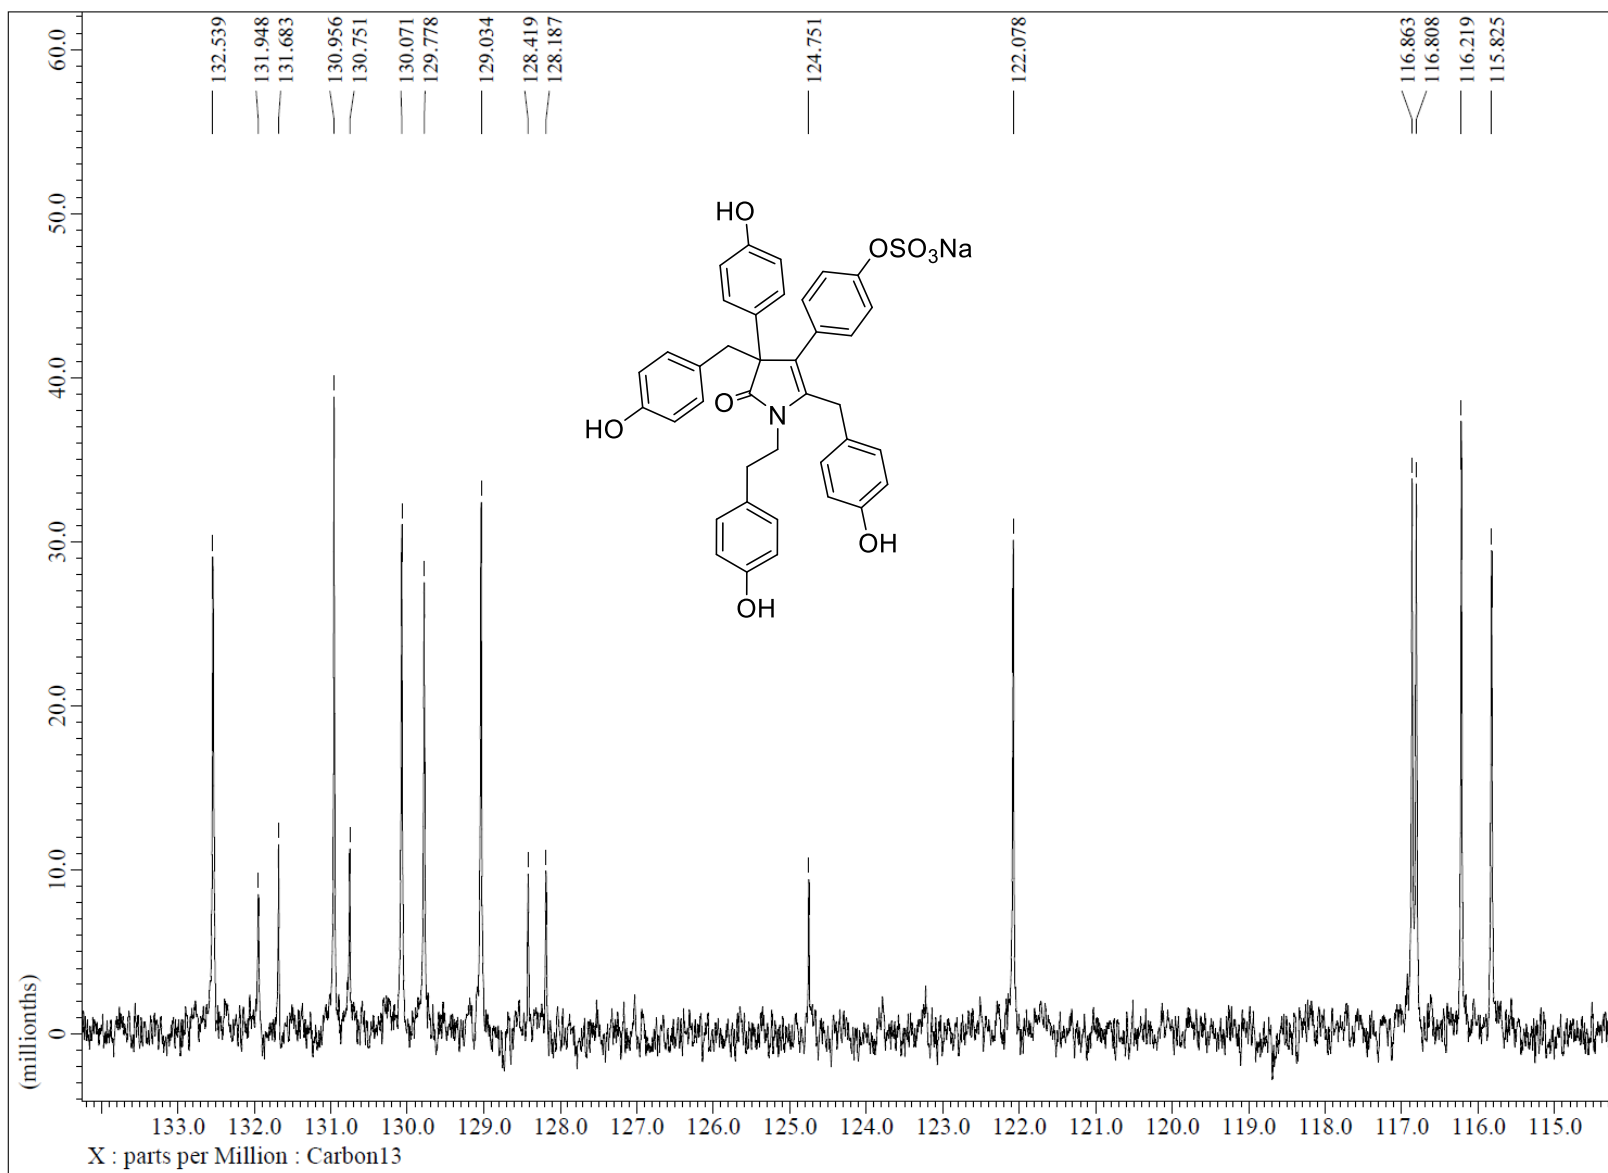

**Figure S1e.** COSY (methanol-*d*4) spectrum of denigrin H (**1**)

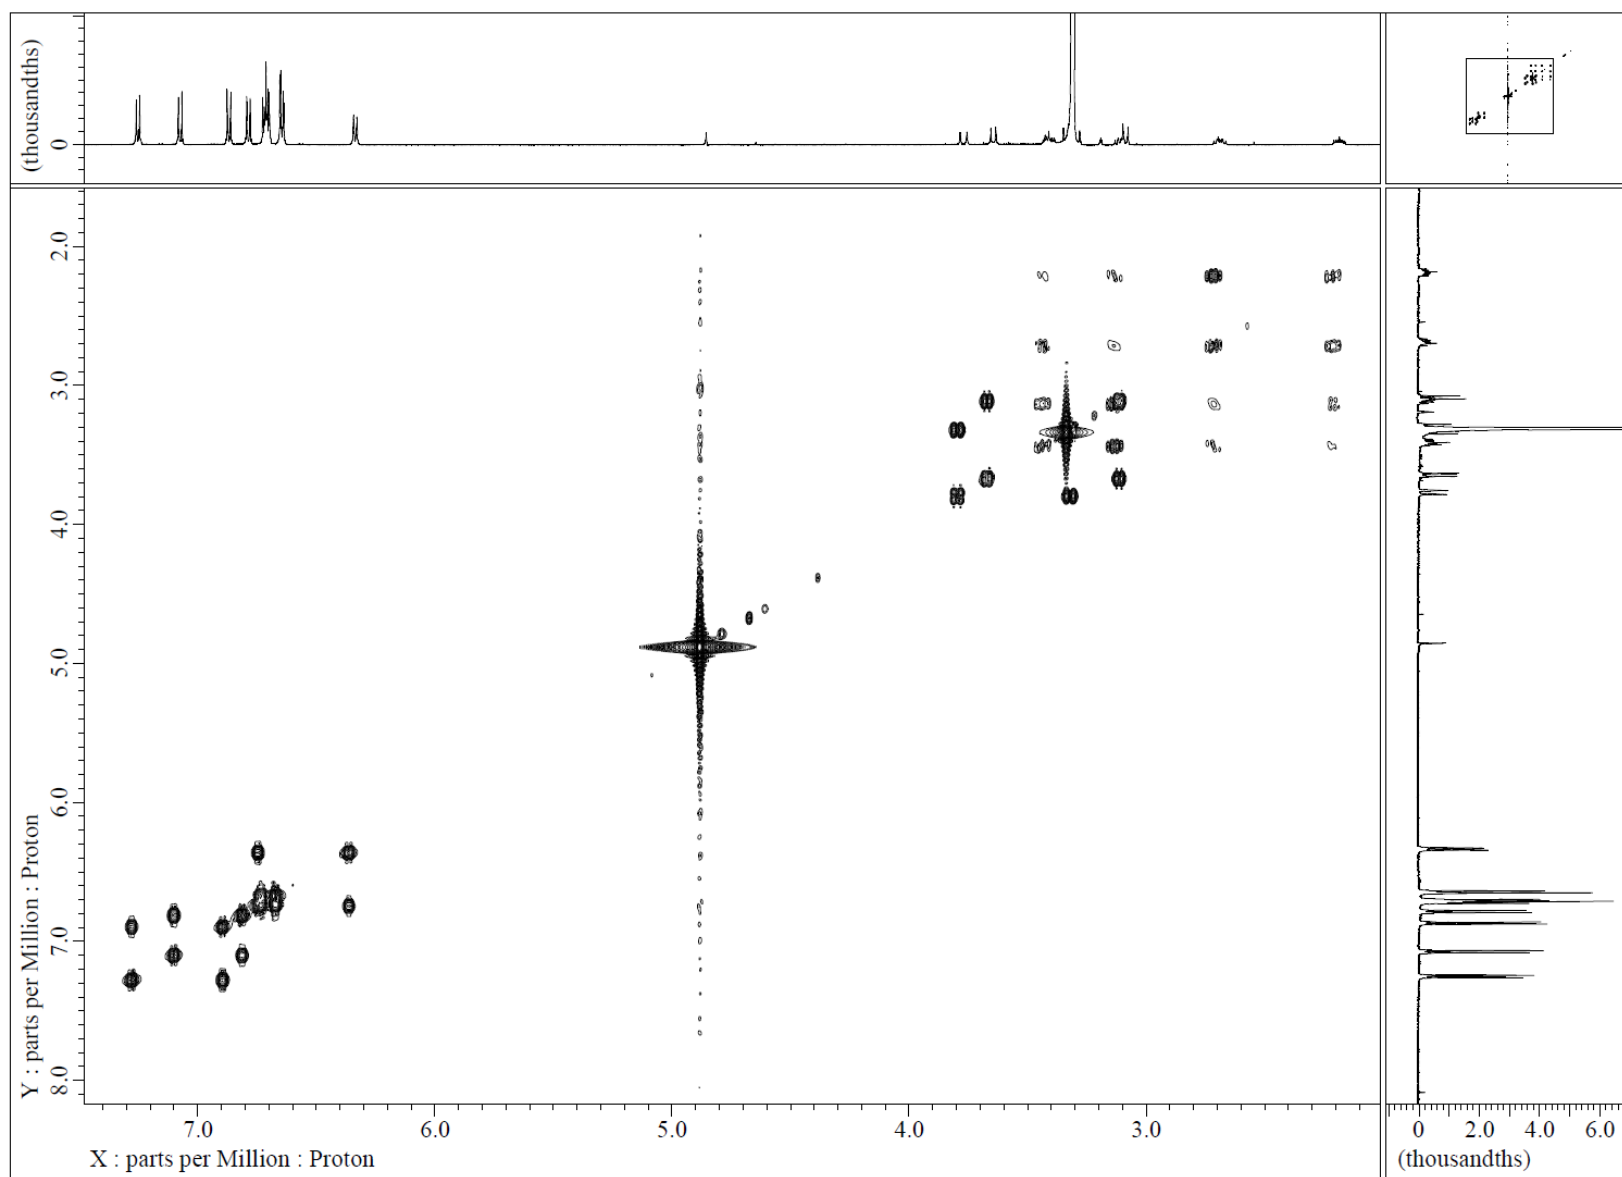

**Figure S1f.** COSY (methanol-*d*<sub>4</sub>) spectrum of denigrin H (**1**)

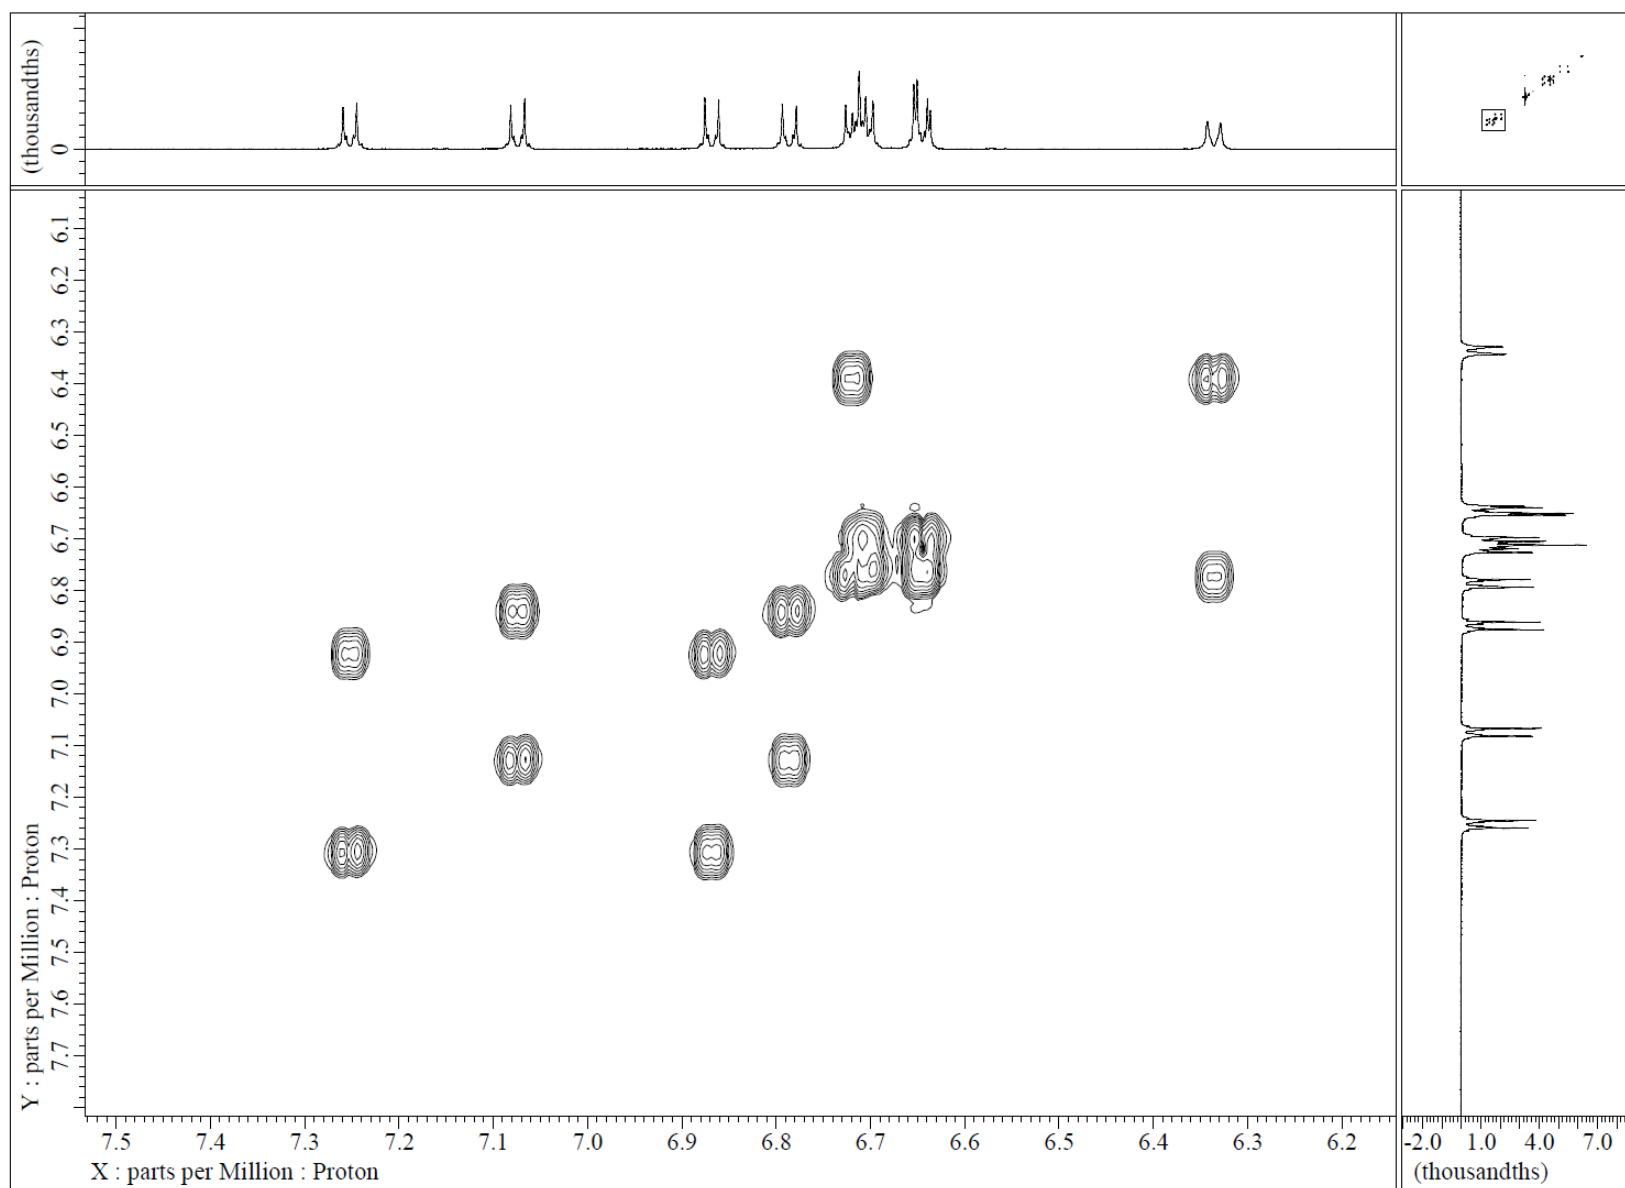

**Figure S1g.** gHSQC (methanol-*d*4) spectrum of denigrin H (**1**)

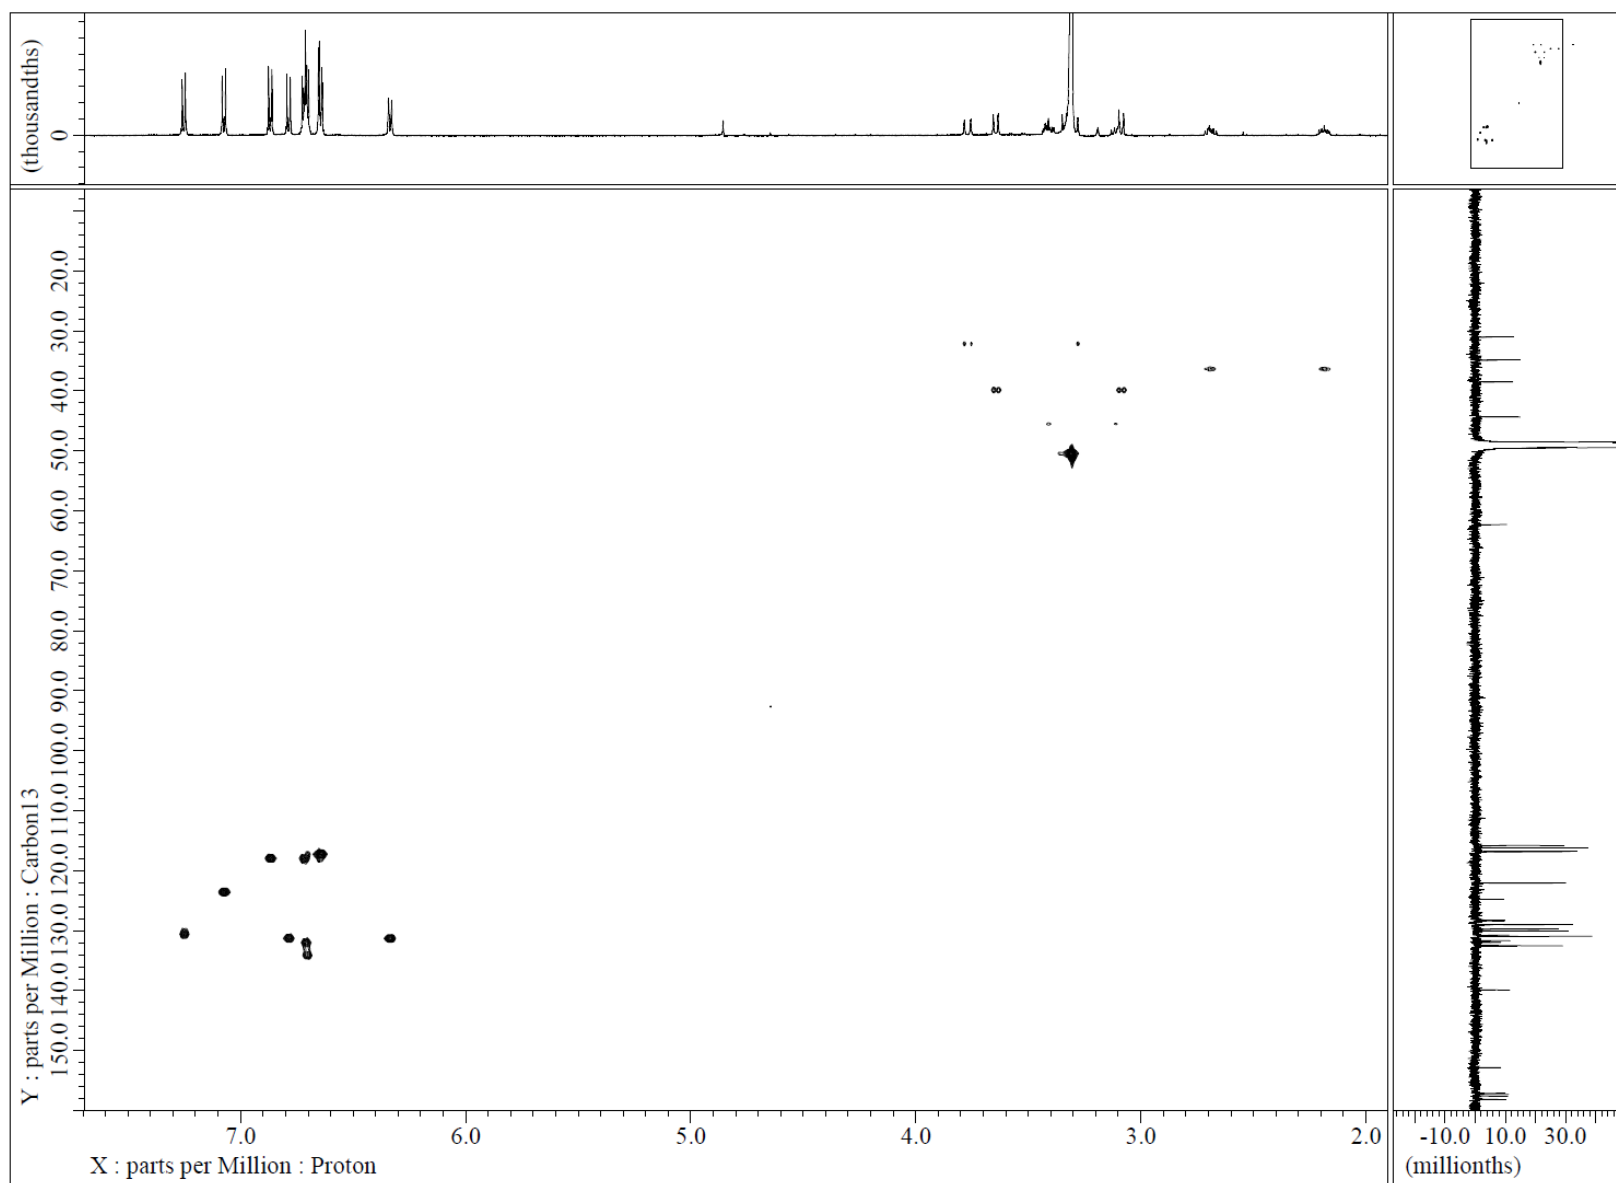

**Figure S1h.** gHMBC (methanol-*d*<sub>4</sub>) spectrum of denigrin H (**1**)

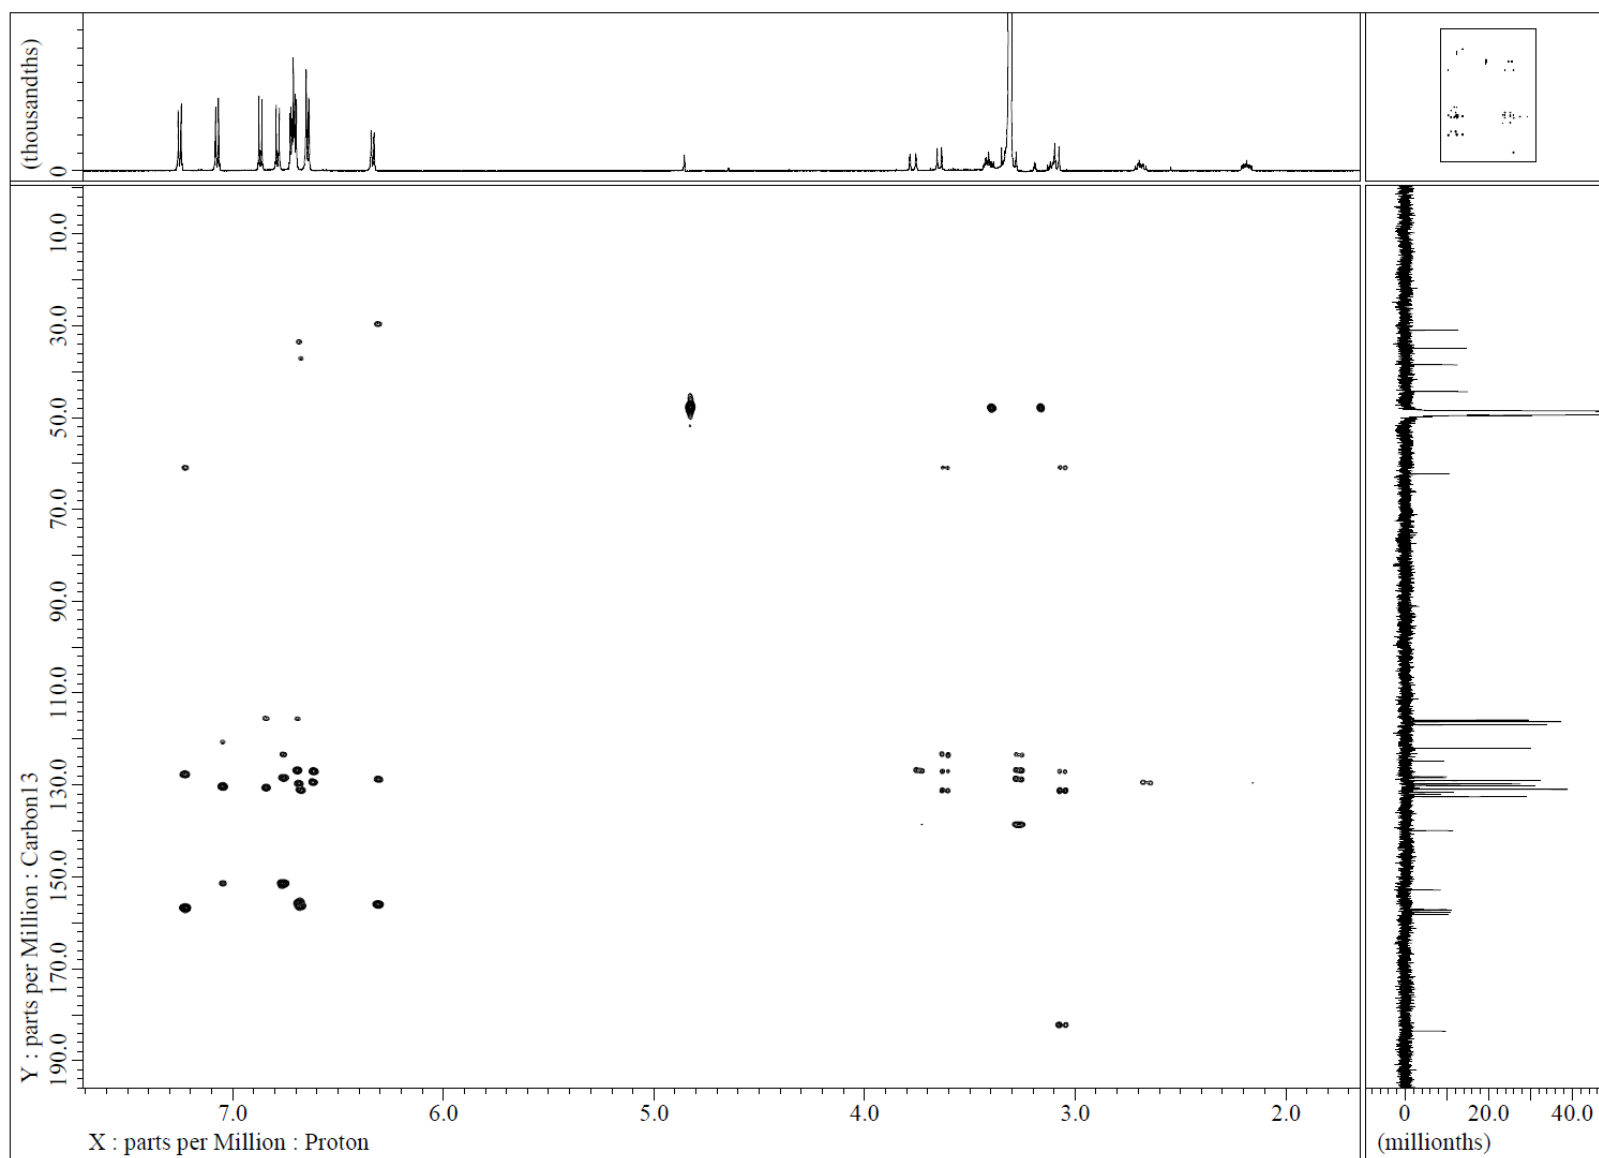

**Figure S1i.** gHMBC (methanol-*d*4) spectrum expansion of denigrin H (**1**)

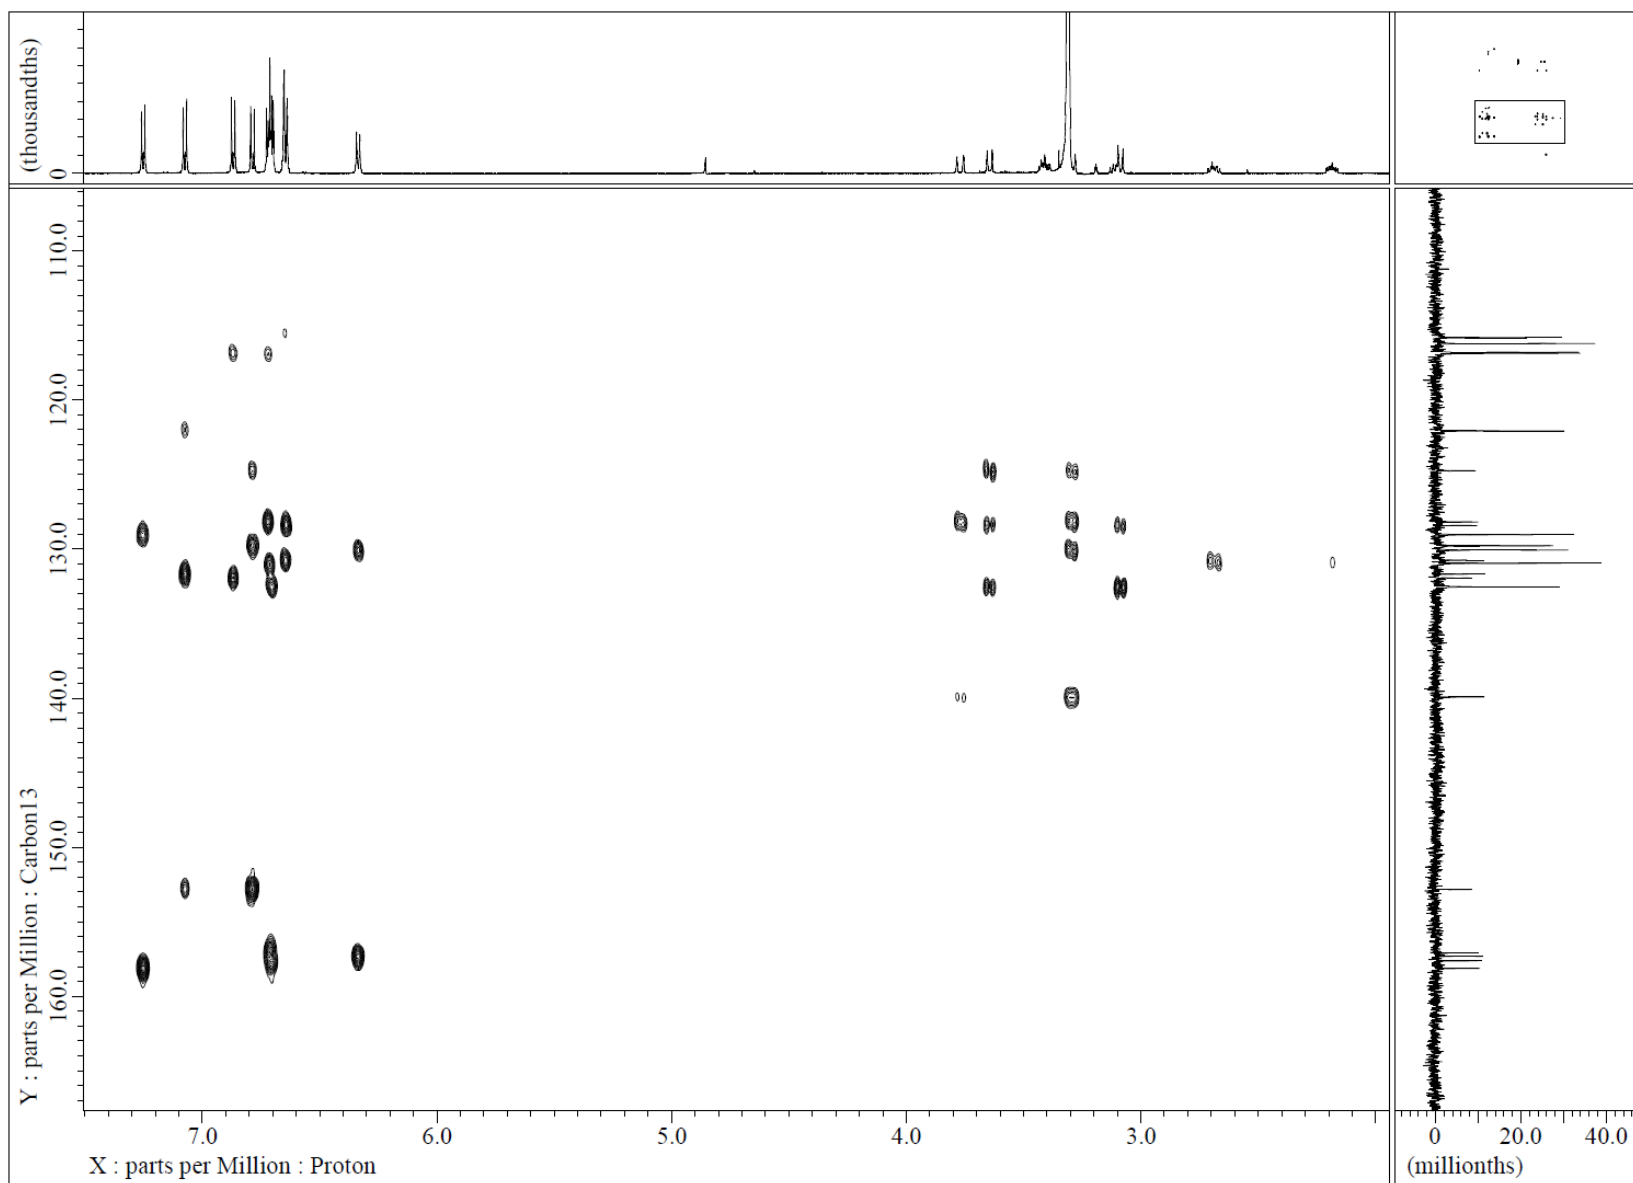

**Figure S1j.** HRESIMS spectrum of denigrin H (**1**) in negative ion mode

**Acquisition Parameter**

|             |          |                    |          |                    |        |
|-------------|----------|--------------------|----------|--------------------|--------|
| Source Type | ESI      | Ion Polarity       | Negative | Set Corrector Fill | 46 V   |
| n/a         | n/a      | Set Capillary Exit | -150.0 V | Set Pulsar Pull    | 800 V  |
| Scan Begin  | 50 m/z   | Set Hexapole RF    | 80.0 V   | Set Pulsar Push    | 800 V  |
| Scan End    | 1500 m/z | Set Skimmer 1      | -50.0 V  | Set Reflector      | 1700 V |
|             |          | Set Hexapole 1     | -25.0 V  | Set Flight Tube    | 8600 V |
|             |          |                    |          | Set Detector TOF   | 2250 V |

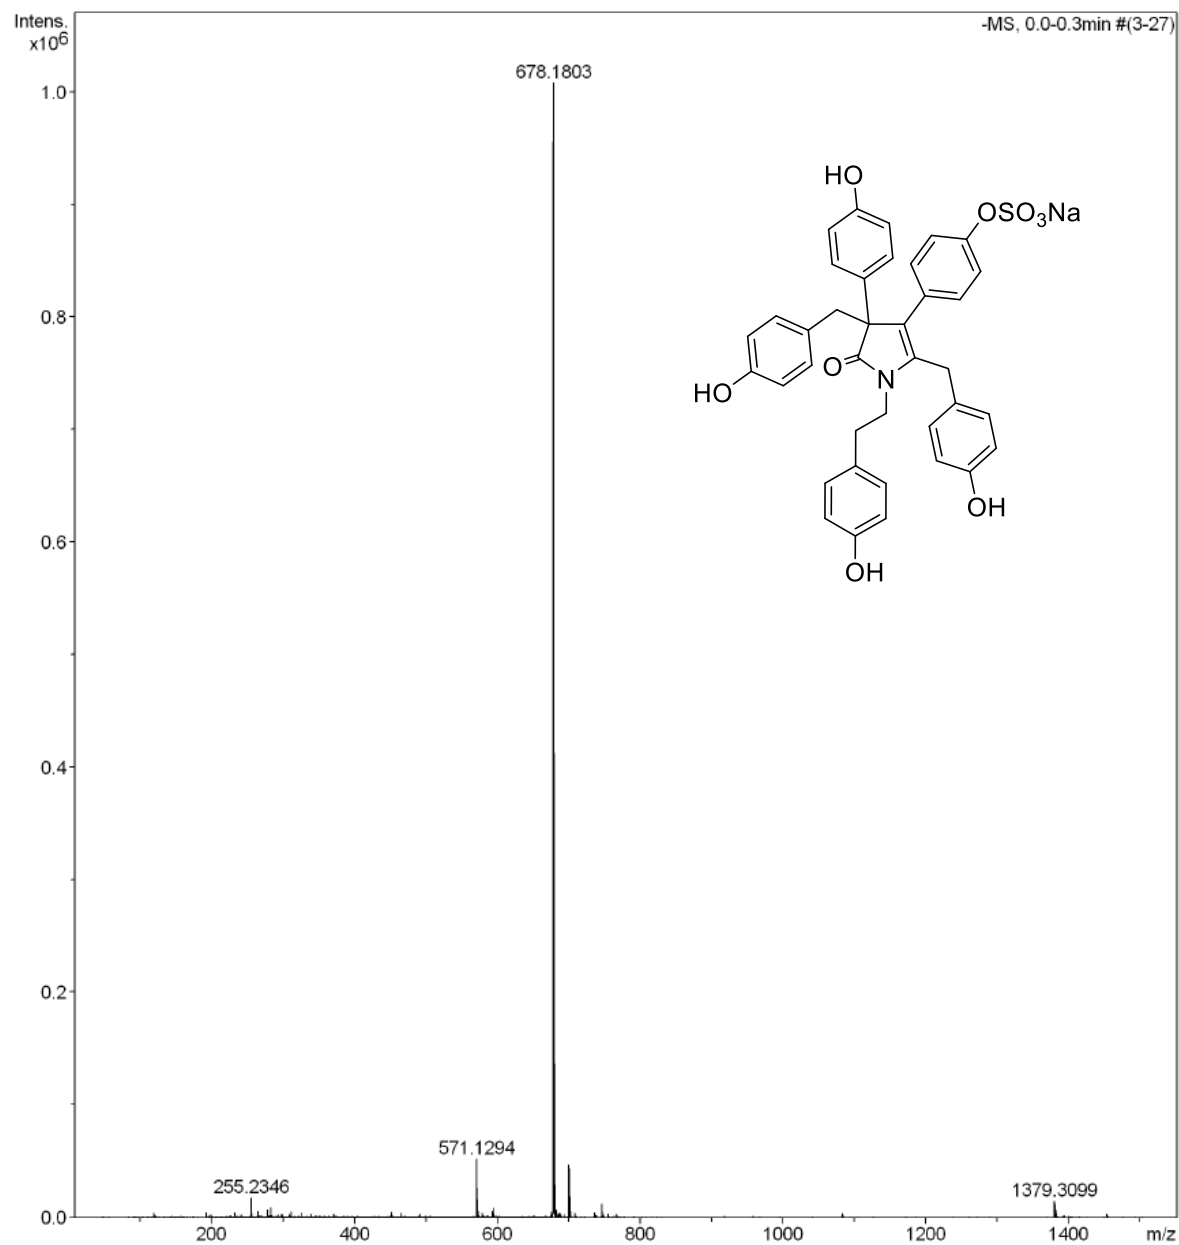

**Figure S2a.**  $^1\text{H}$  NMR (methanol- $d_4$ , 600 MHz) spectrum of denigrin I (**2**)

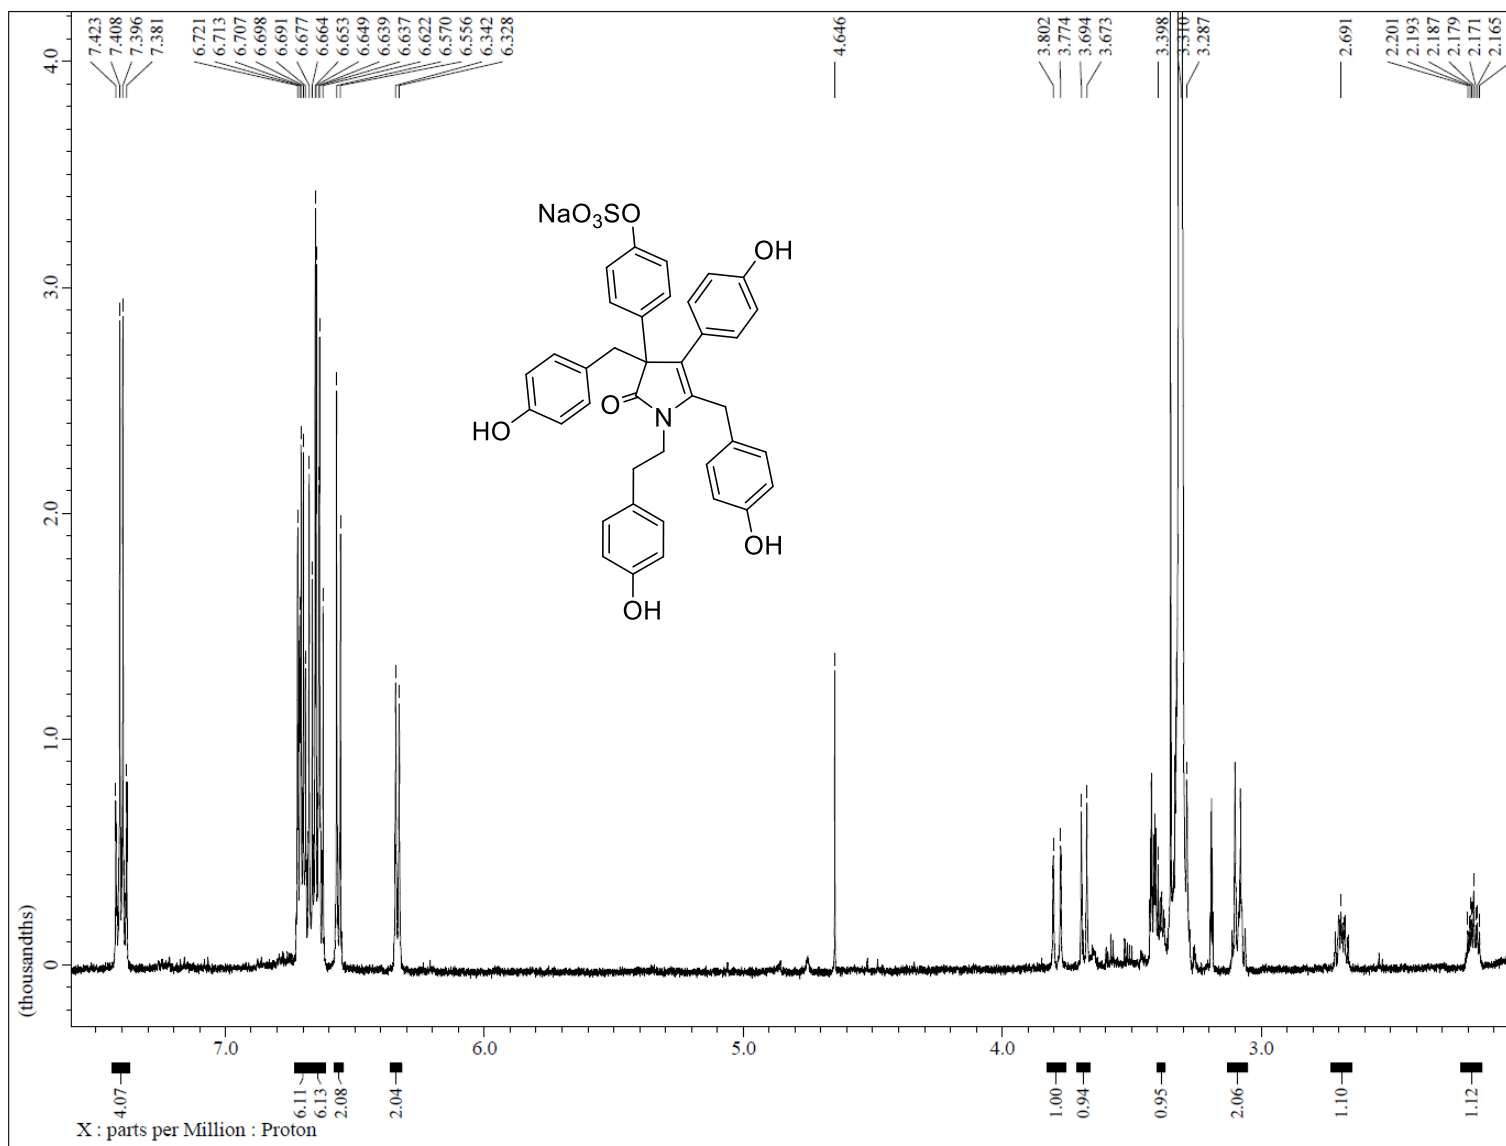

**Figure S2b.**  $^{13}\text{C}$  NMR (methanol- $d_4$ , 150 MHz) spectrum of denigrin I (**2**)

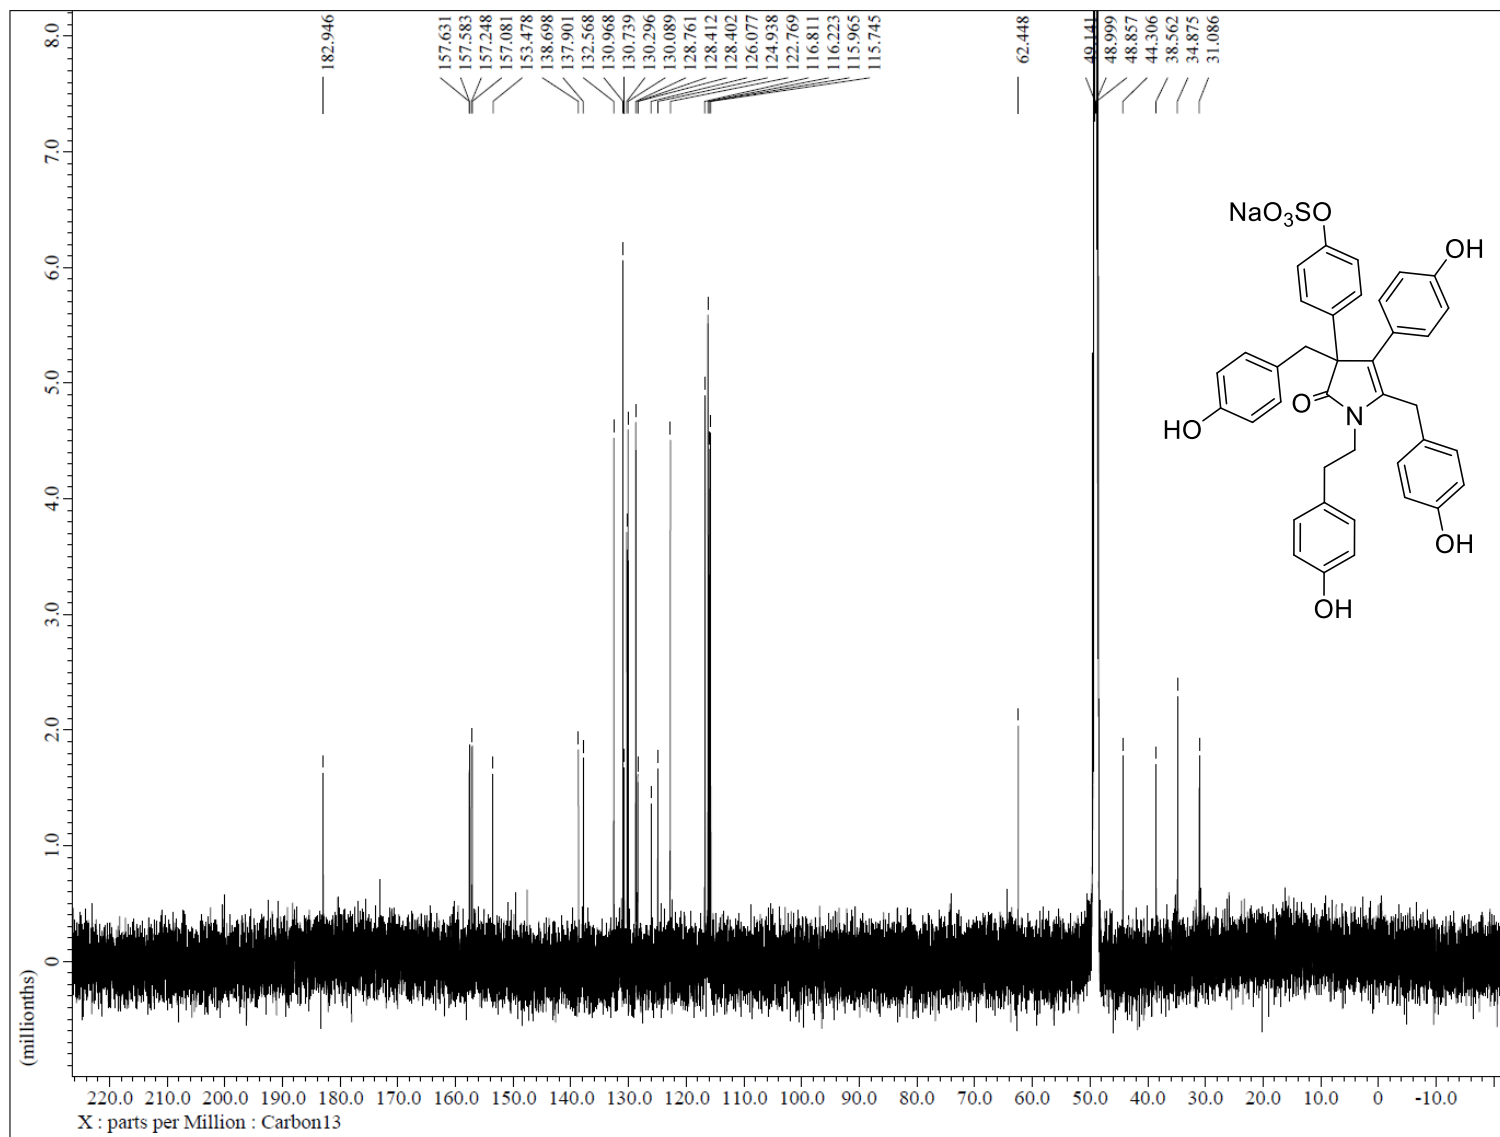

**Figure S2c.**  $^{13}\text{C}$  NMR (methanol- $d_4$ , 150 MHz) spectrum expansion of denigrin I (**2**)

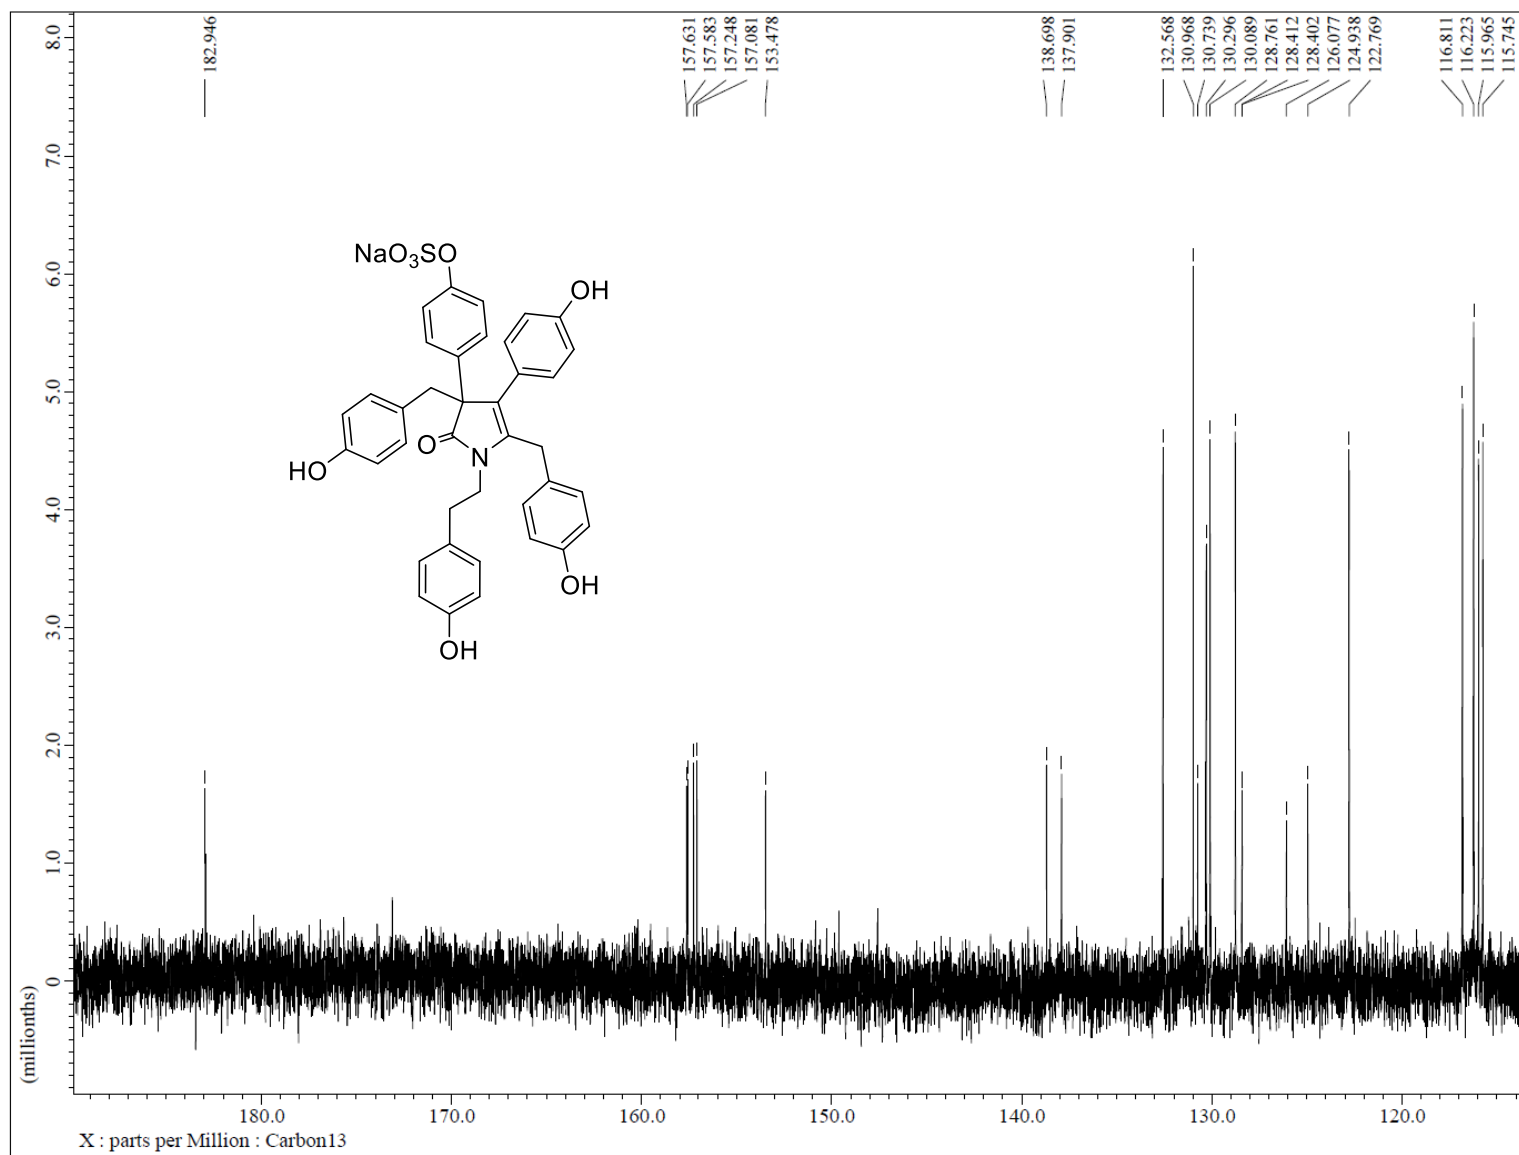

**Figure S2d.** COSY (methanol-*d*<sub>4</sub>) spectrum of denigrin I (**2**)

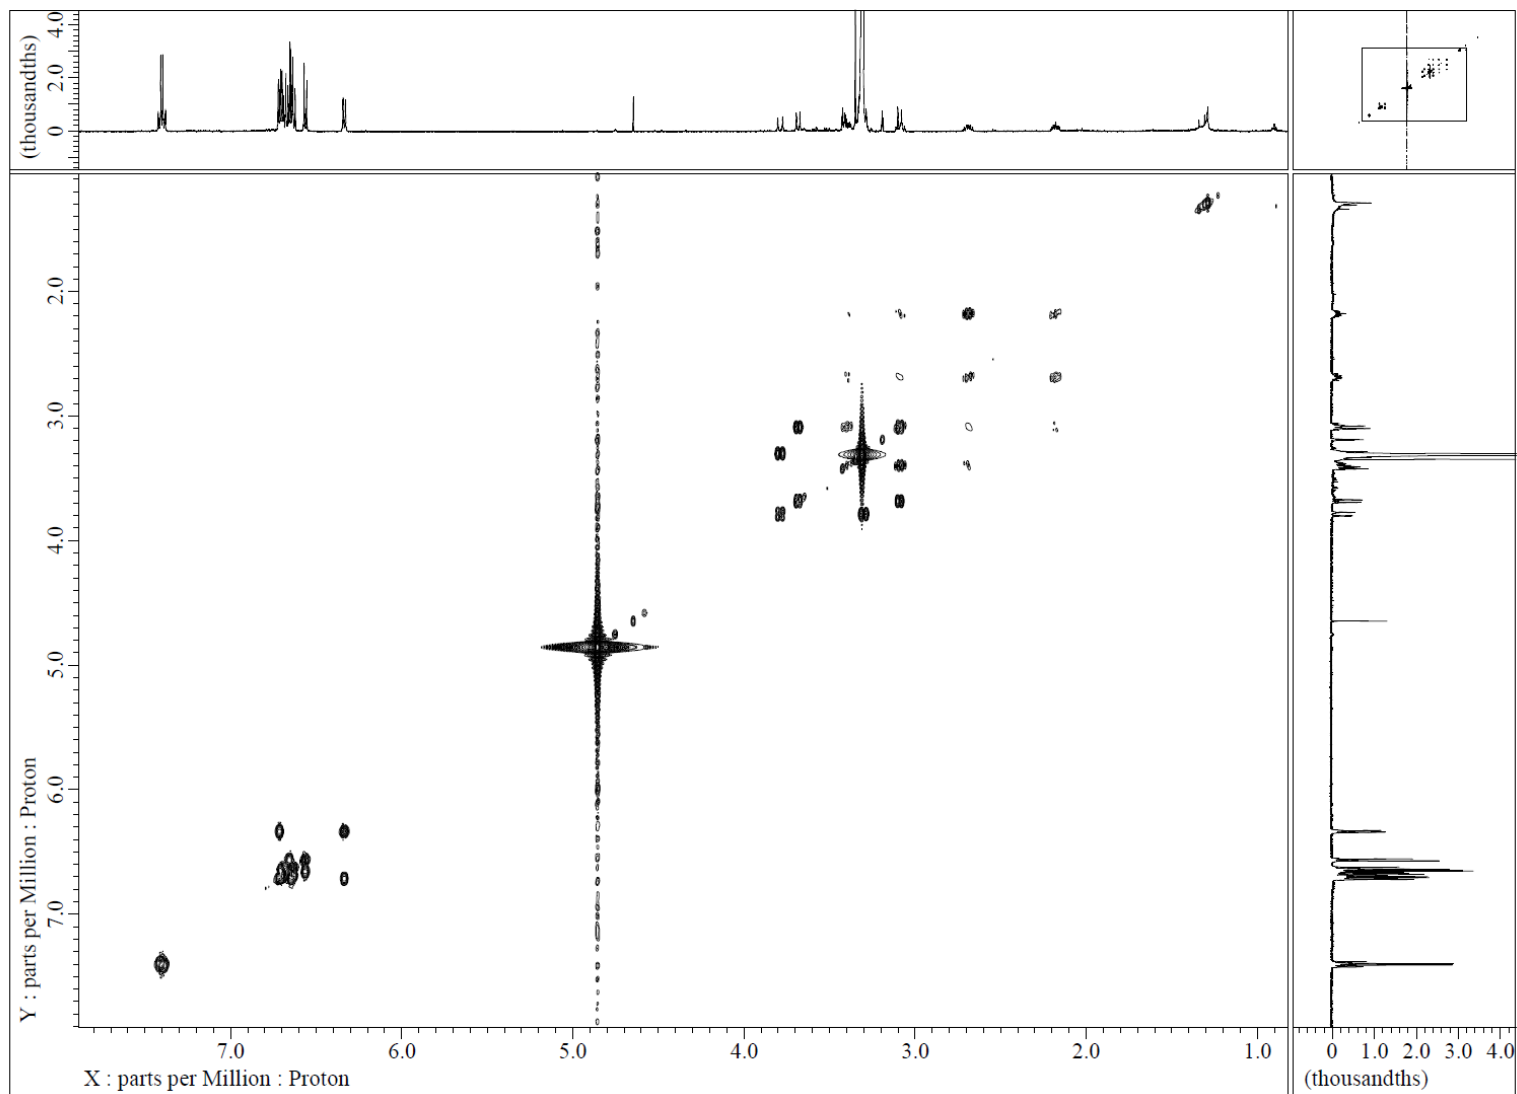

**Figure S2e.** gHSQC (methanol-d<sub>4</sub>) spectrum of denigrin I (**2**)

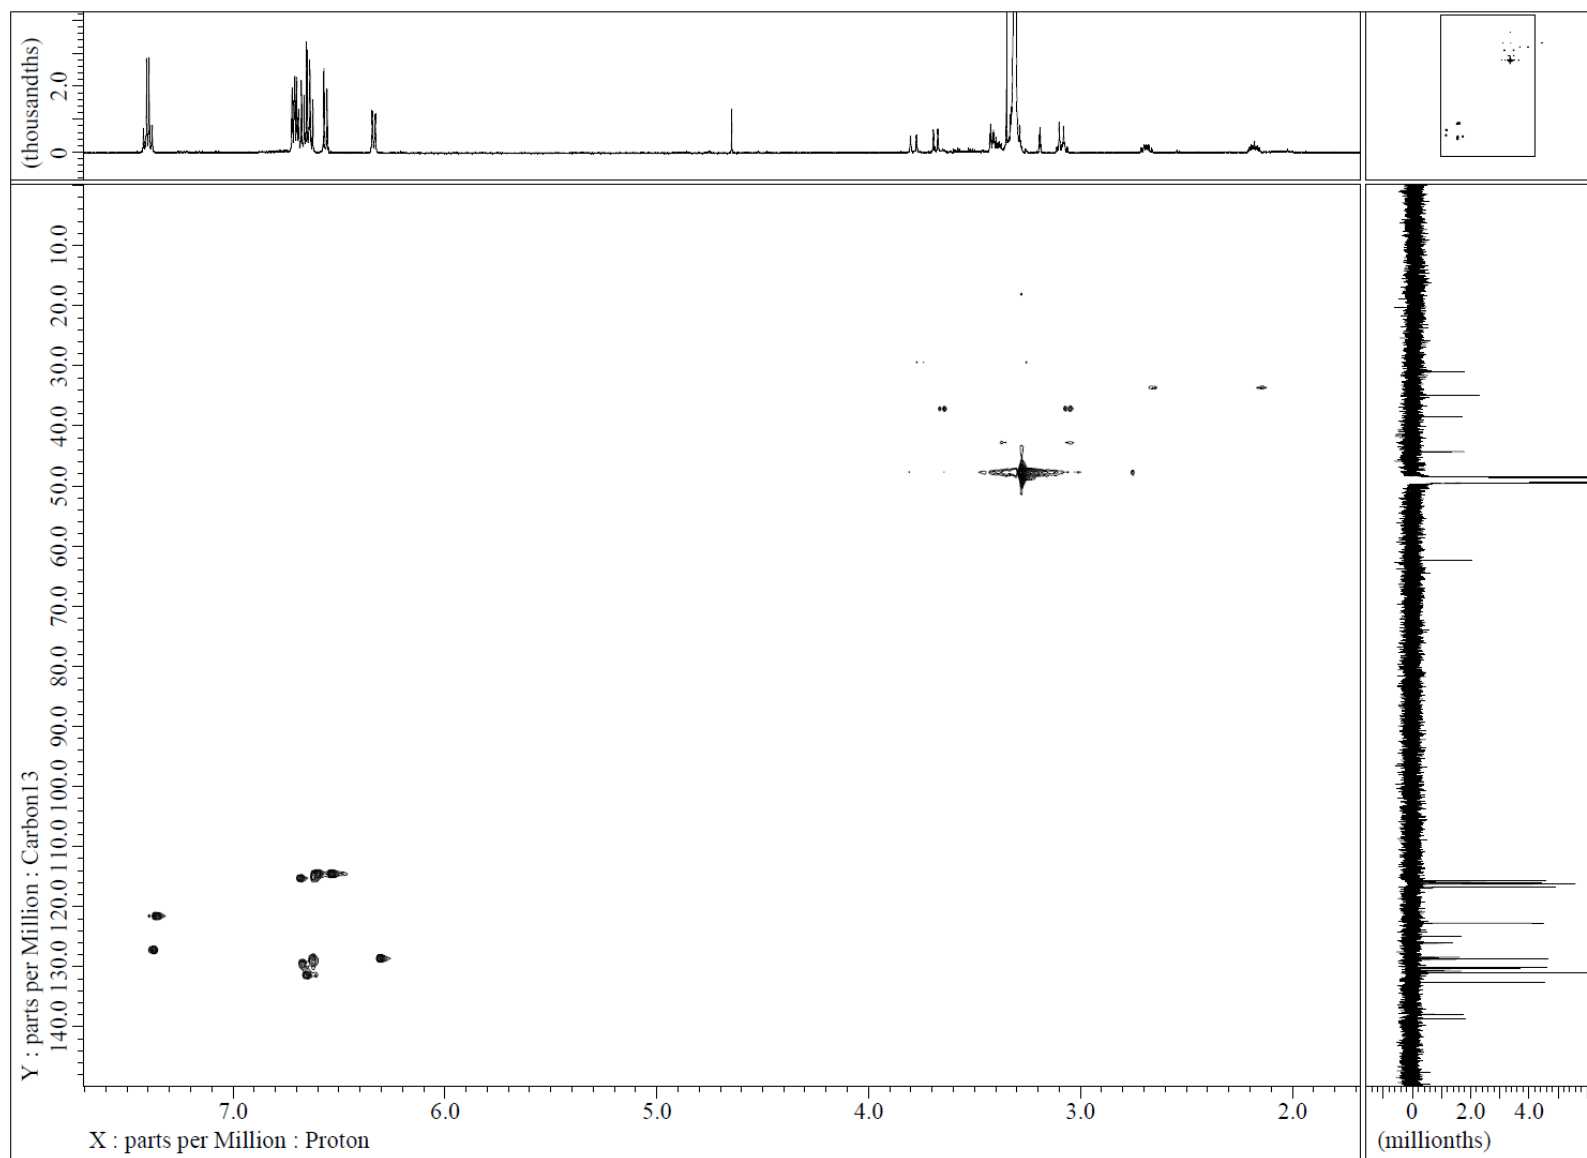

**Figure S2f.** gHMBC (methanol-*d*<sub>4</sub>) spectrum of denigrin I (**2**)

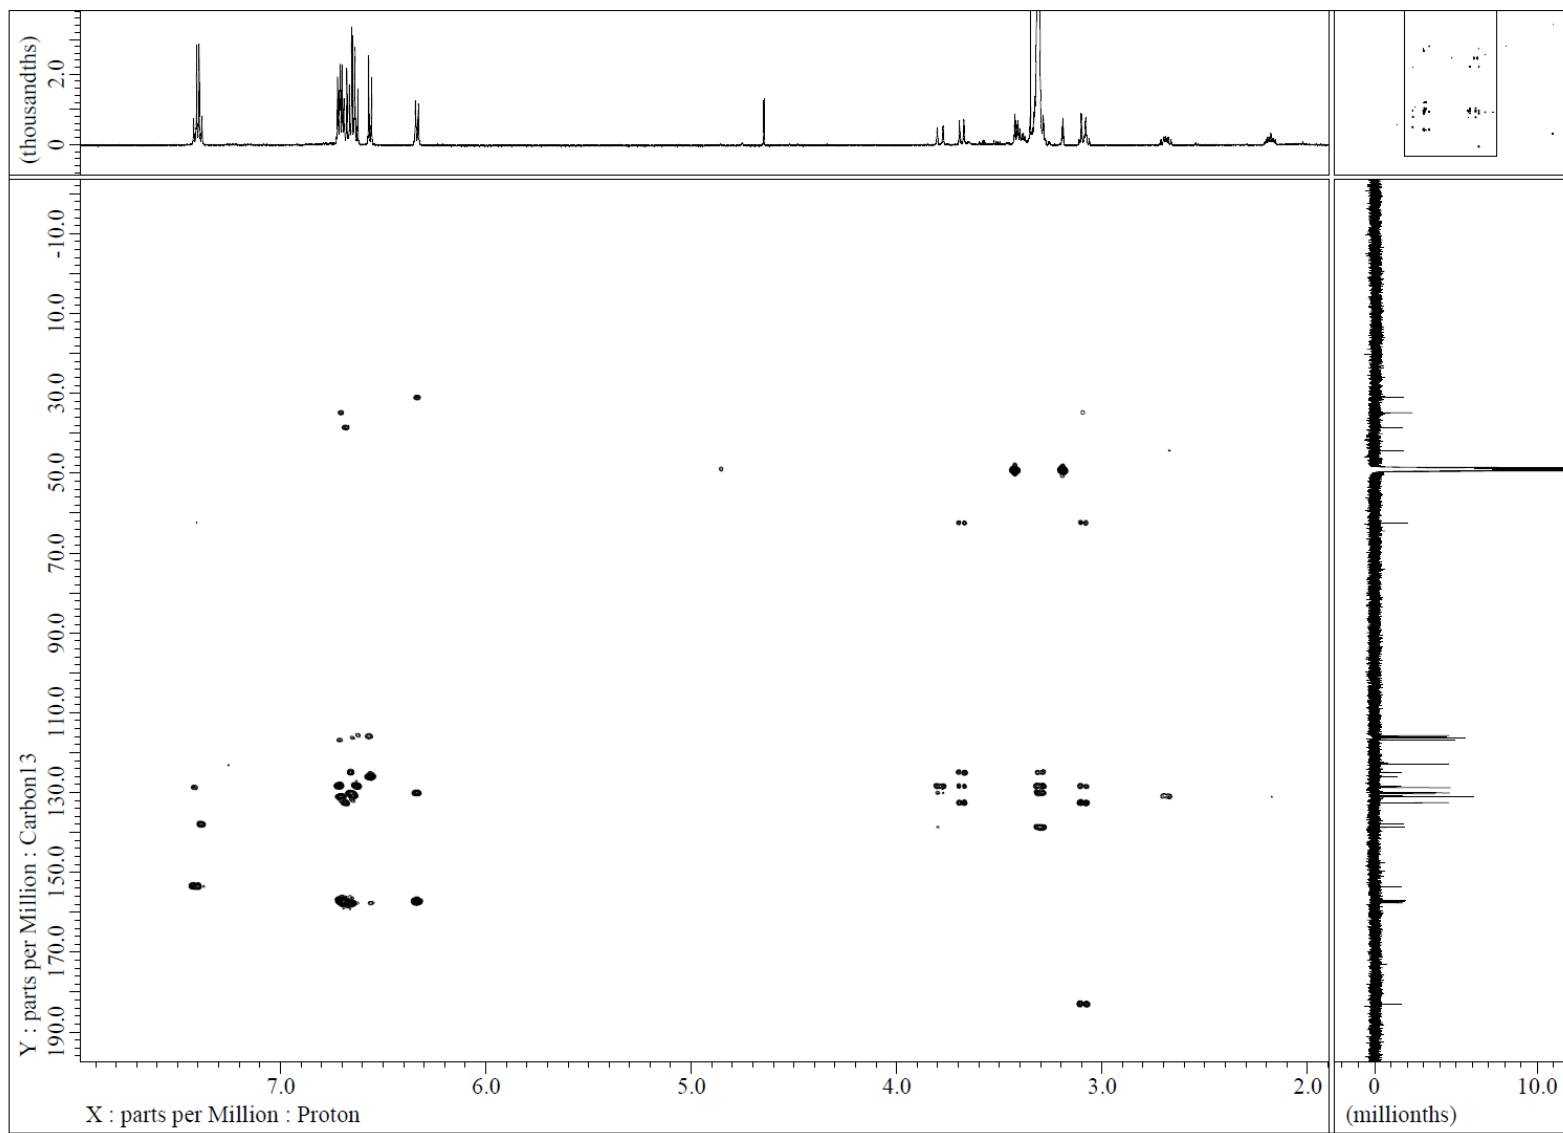

**Figure S2g.** gHMBC (methanol-*d*<sub>4</sub>) spectrum expansion of denigrin I (**2**)

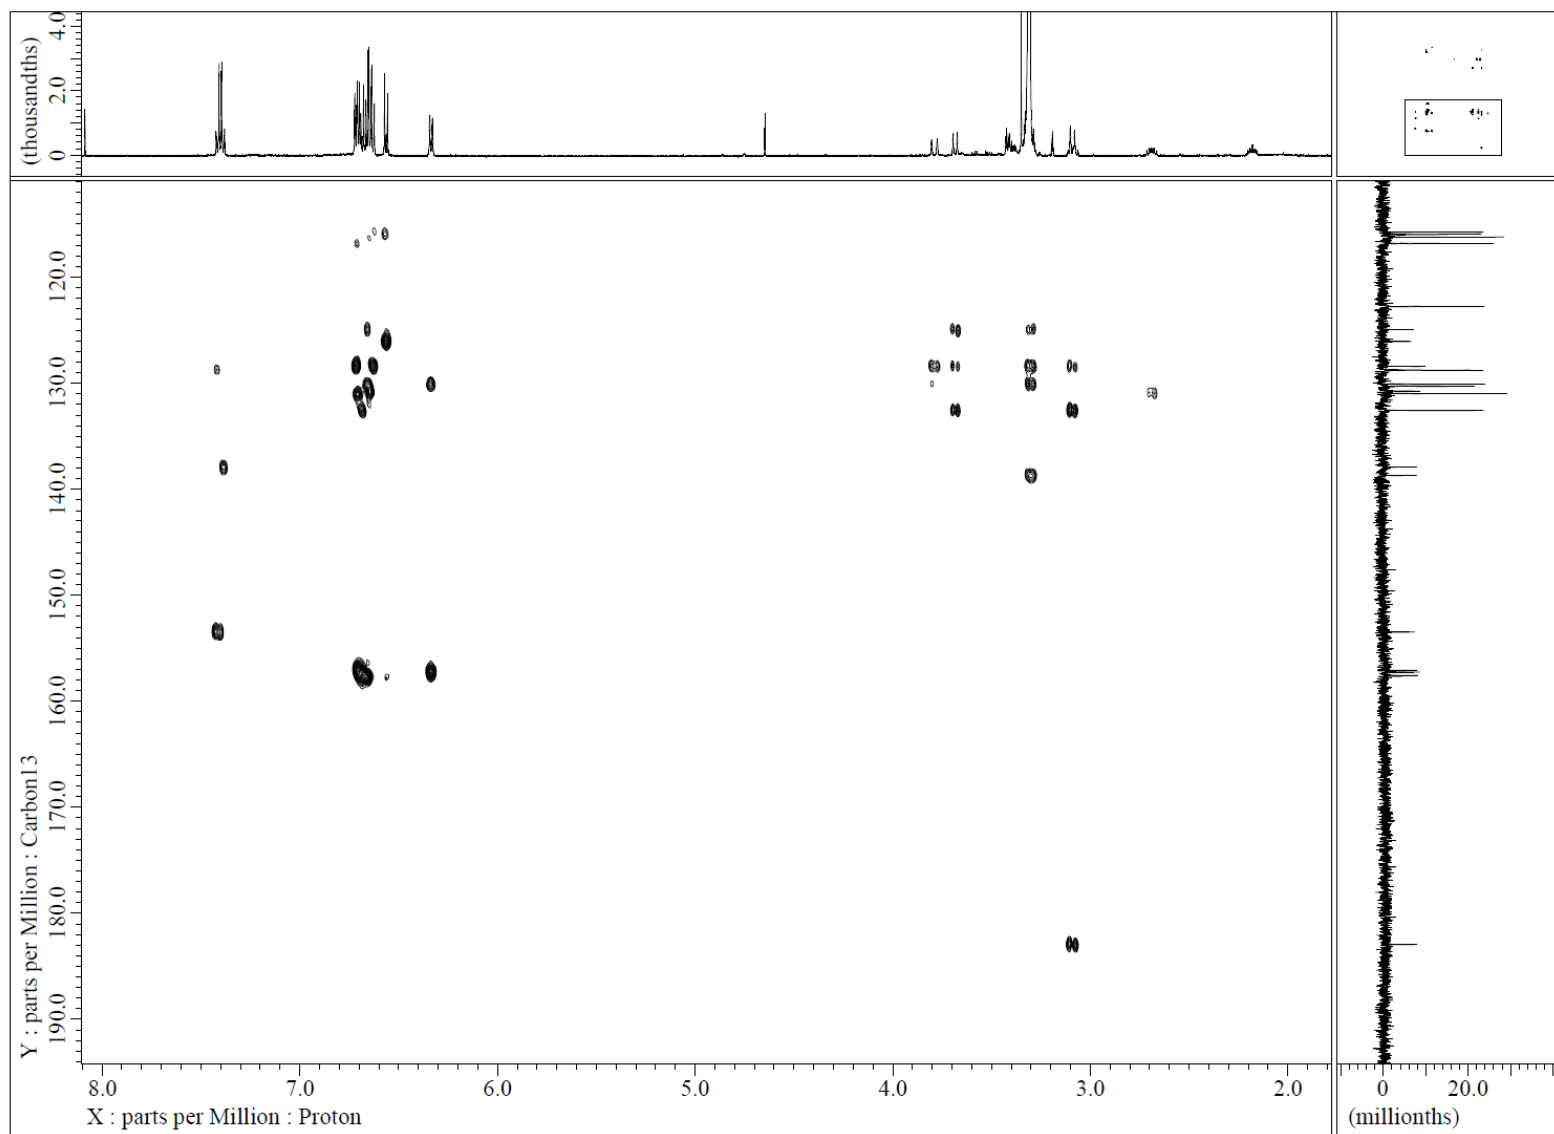

**Figure S2h.** HRESIMS spectrum of denigrin I (**2**) in negative ion mode

**Acquisition Parameter**

|             |          |                    |          |                    |        |
|-------------|----------|--------------------|----------|--------------------|--------|
| Source Type | ESI      | Ion Polarity       | Negative | Set Corrector Fill | 46 V   |
| n/a         | n/a      | Set Capillary Exit | -150.0 V | Set Pulsar Pull    | 800 V  |
| Scan Begin  | 50 m/z   | Set Hexapole RF    | 80.0 V   | Set Pulsar Push    | 800 V  |
| Scan End    | 1500 m/z | Set Skimmer 1      | -50.0 V  | Set Reflector      | 1700 V |
|             |          | Set Hexapole 1     | -25.0 V  | Set Flight Tube    | 8600 V |
|             |          |                    |          | Set Detector TOF   | 2250 V |

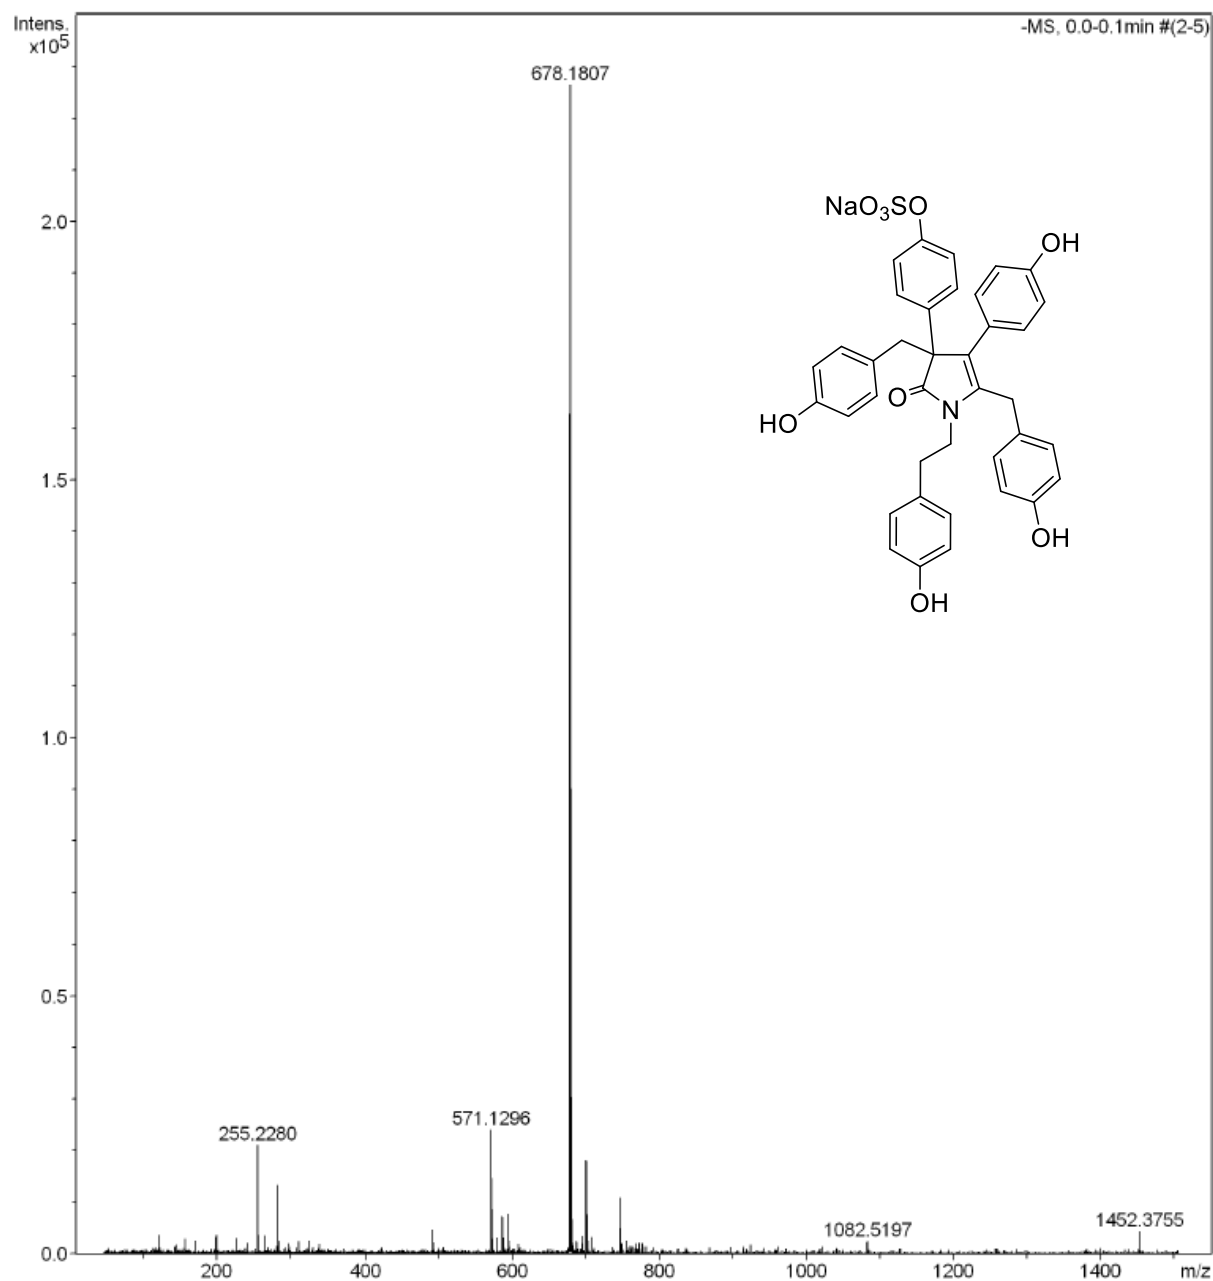

**Figure S3a.**  $^1\text{H}$  NMR (methanol- $d_4$ , 600 MHz) spectrum of denigrin J (**3**)

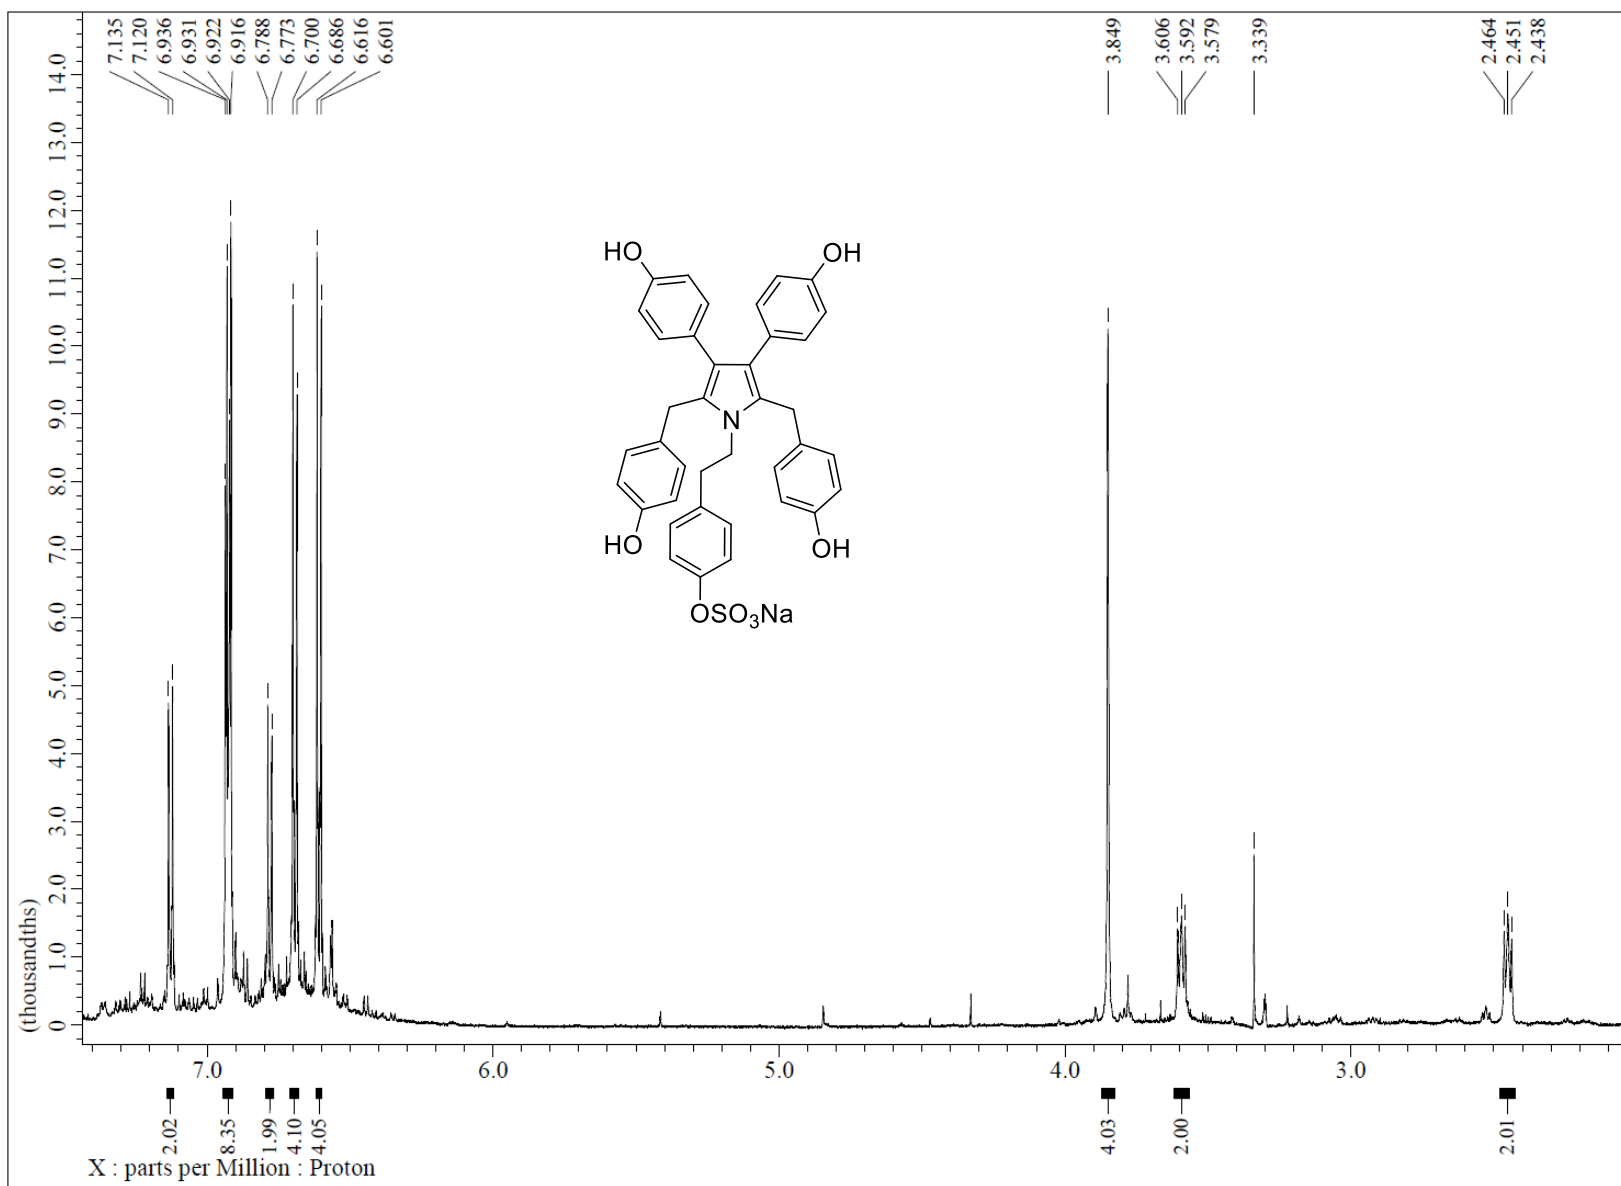

**Figure S3b.**  $^{13}\text{C}$  NMR (methanol- $d_4$ , 150 MHz) spectrum of denigrin J (**3**)

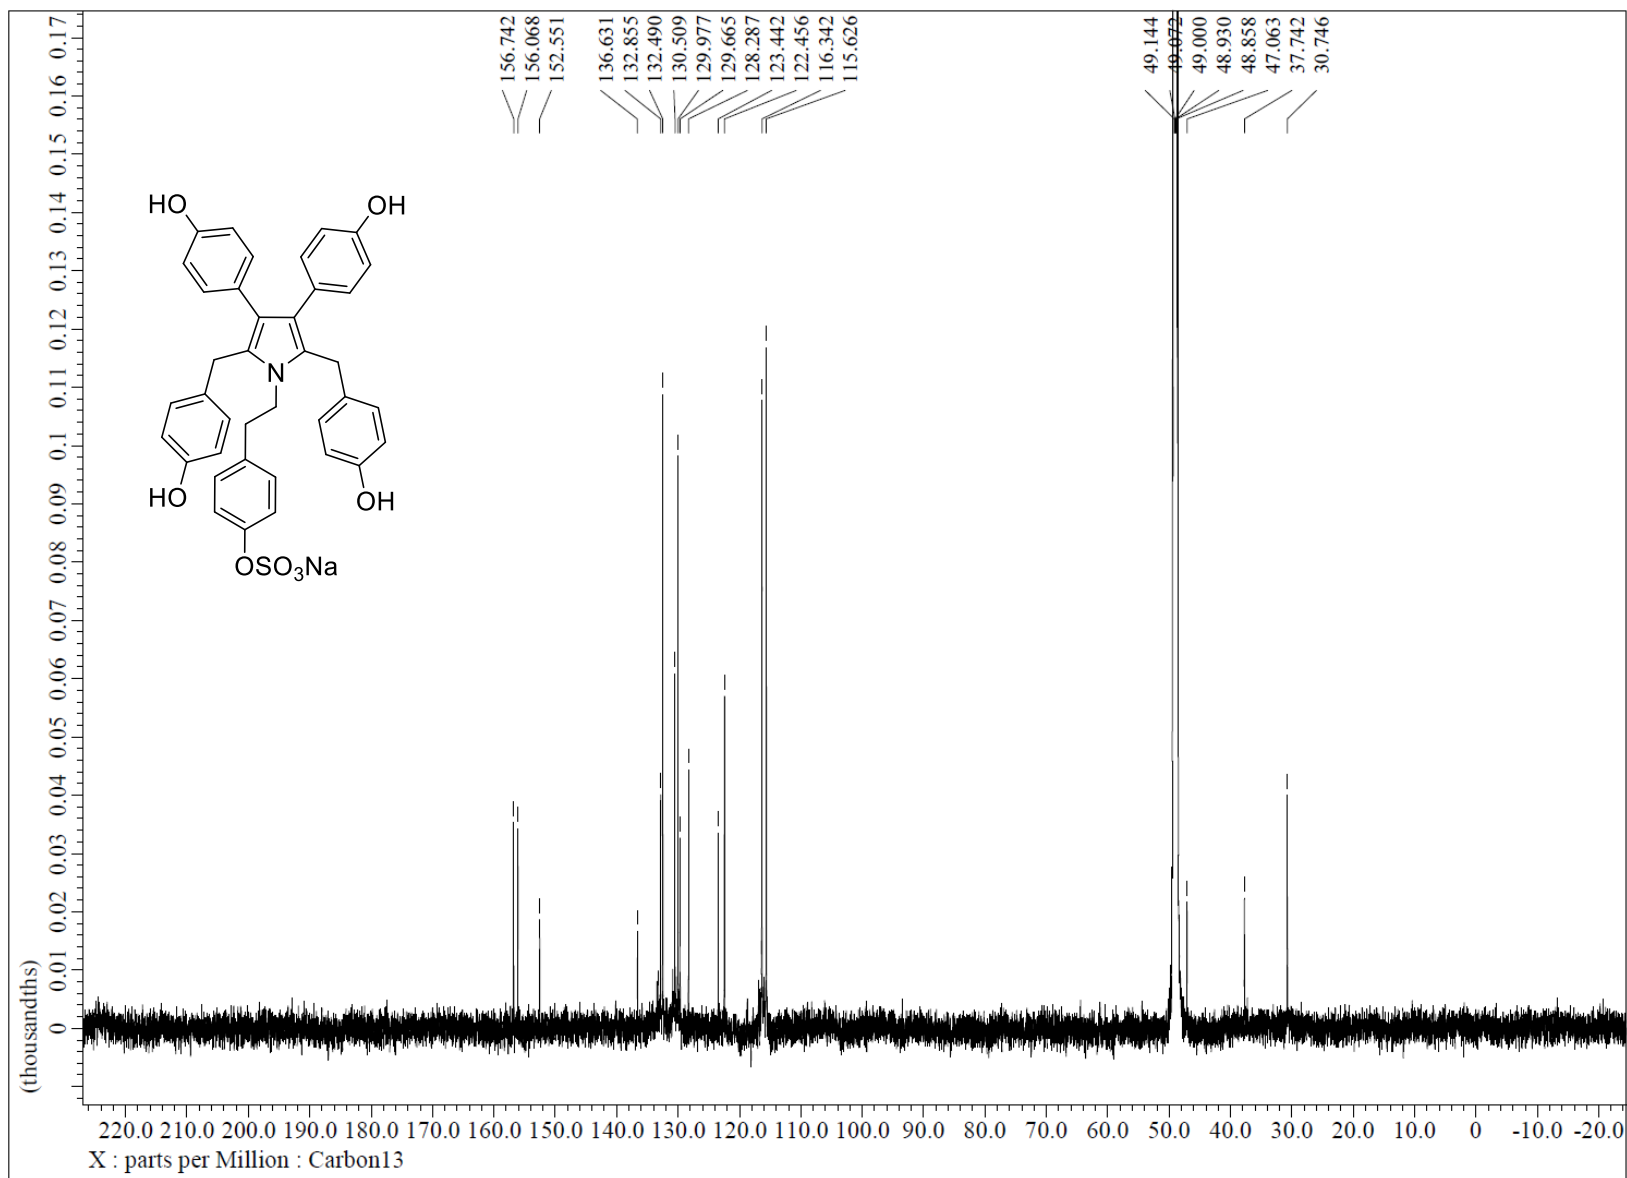

**Figure S3c.**  $^{13}\text{C}$  NMR (methanol- $d_4$ , 150 MHz) spectrum expansion of denigrin J (**3**)

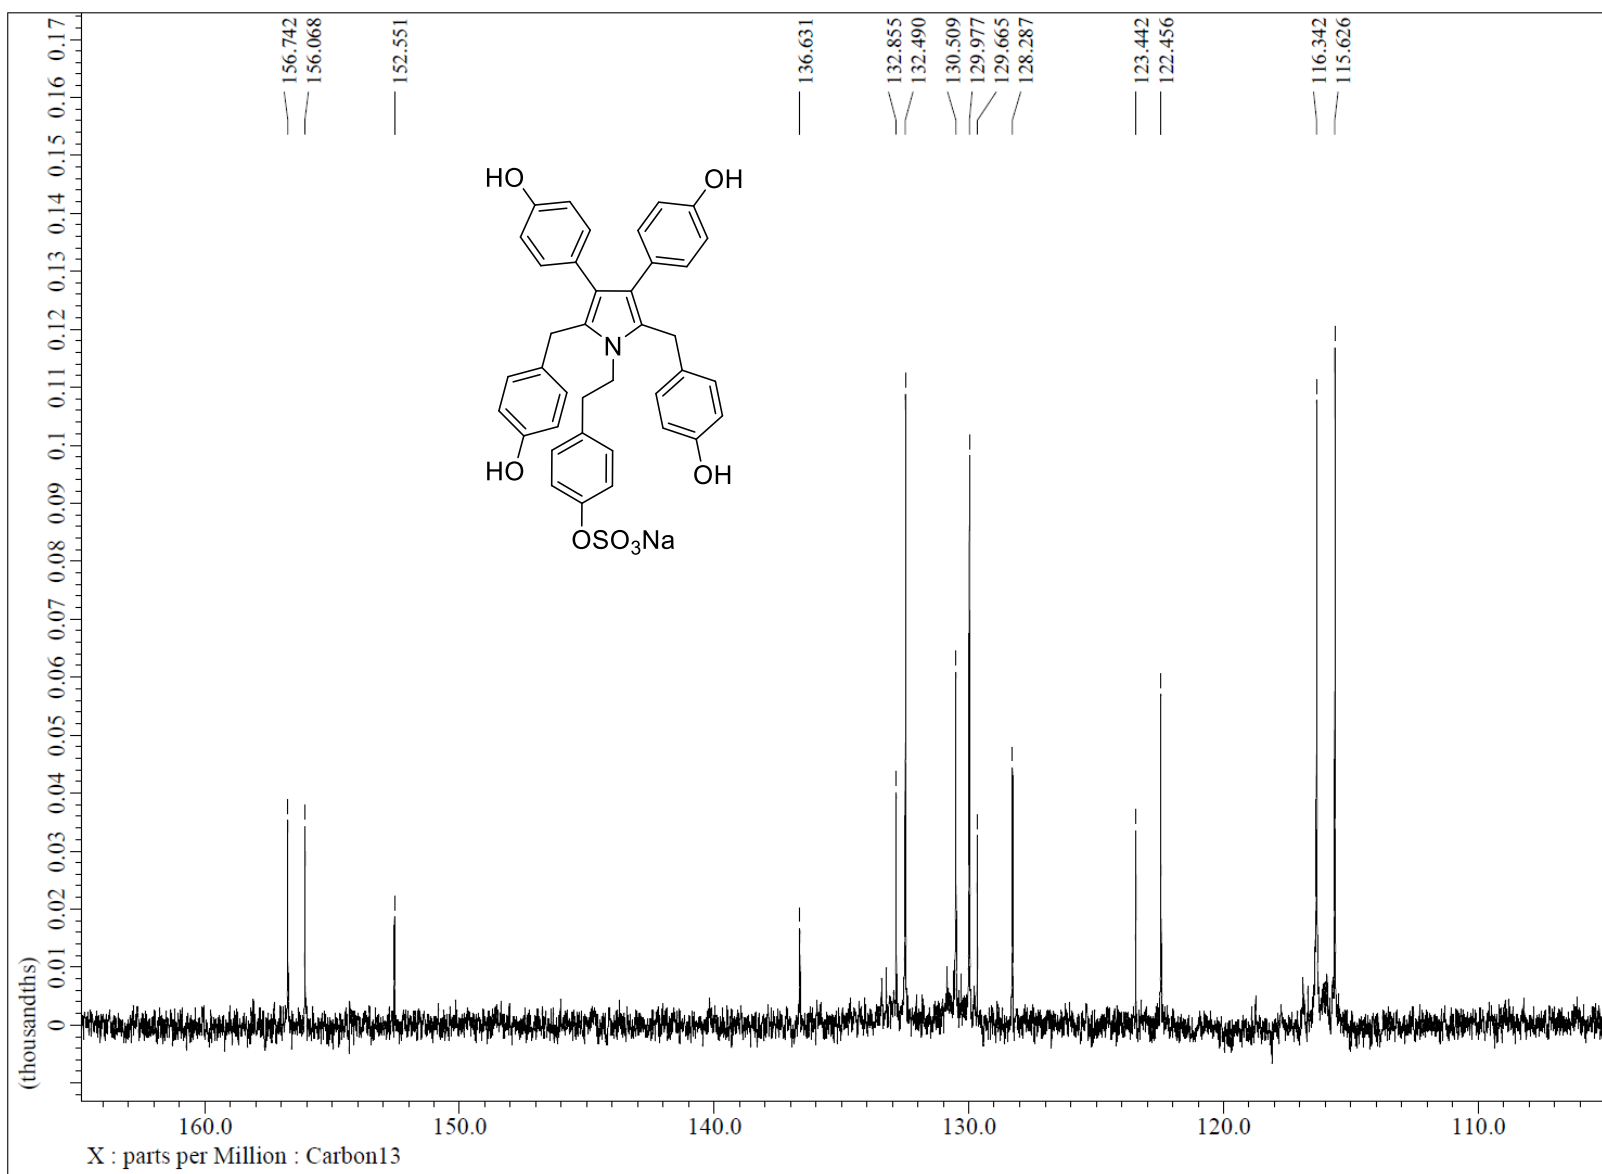

**Figure S3d.** COSY (methanol-*d*<sub>4</sub>) spectrum of denigrin J (**3**)

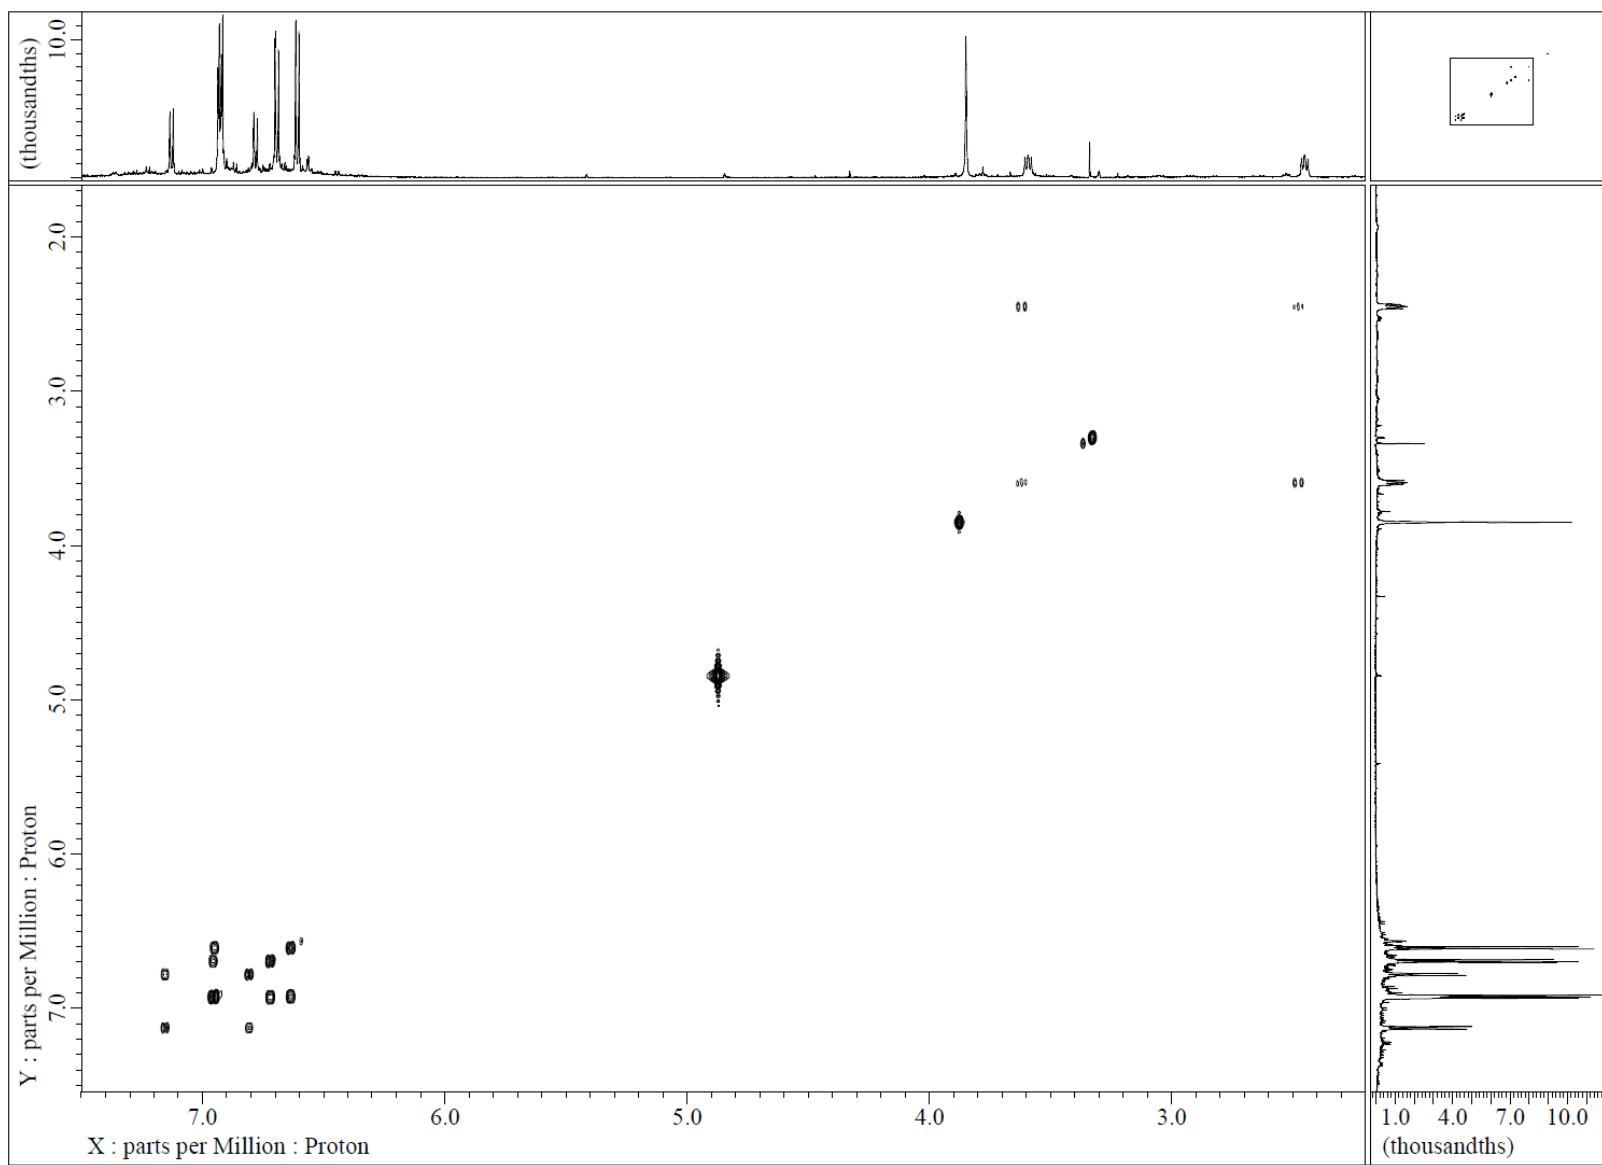

**Figure S3e.** gHSQC (methanol-*d*4) spectrum of denigrin J (**3**)

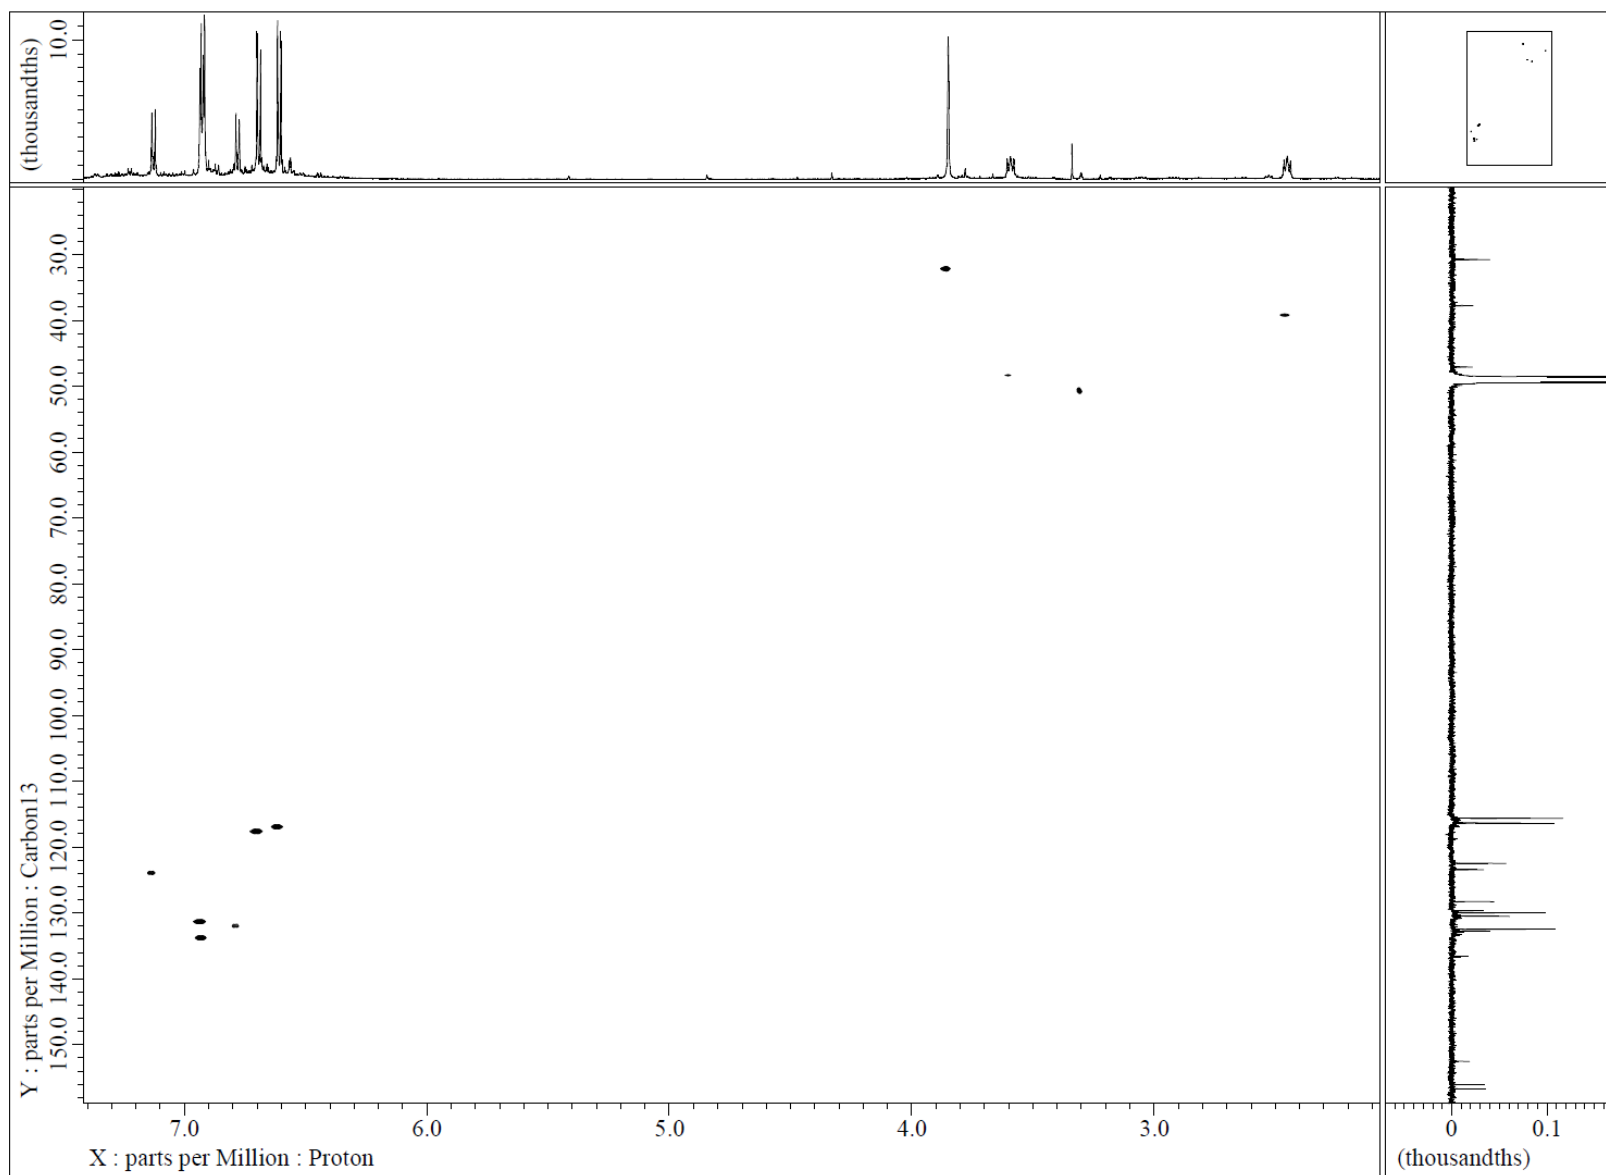

**Figure S3f.** gHMBC (methanol-*d*4) spectrum of denigrin J (**3**)

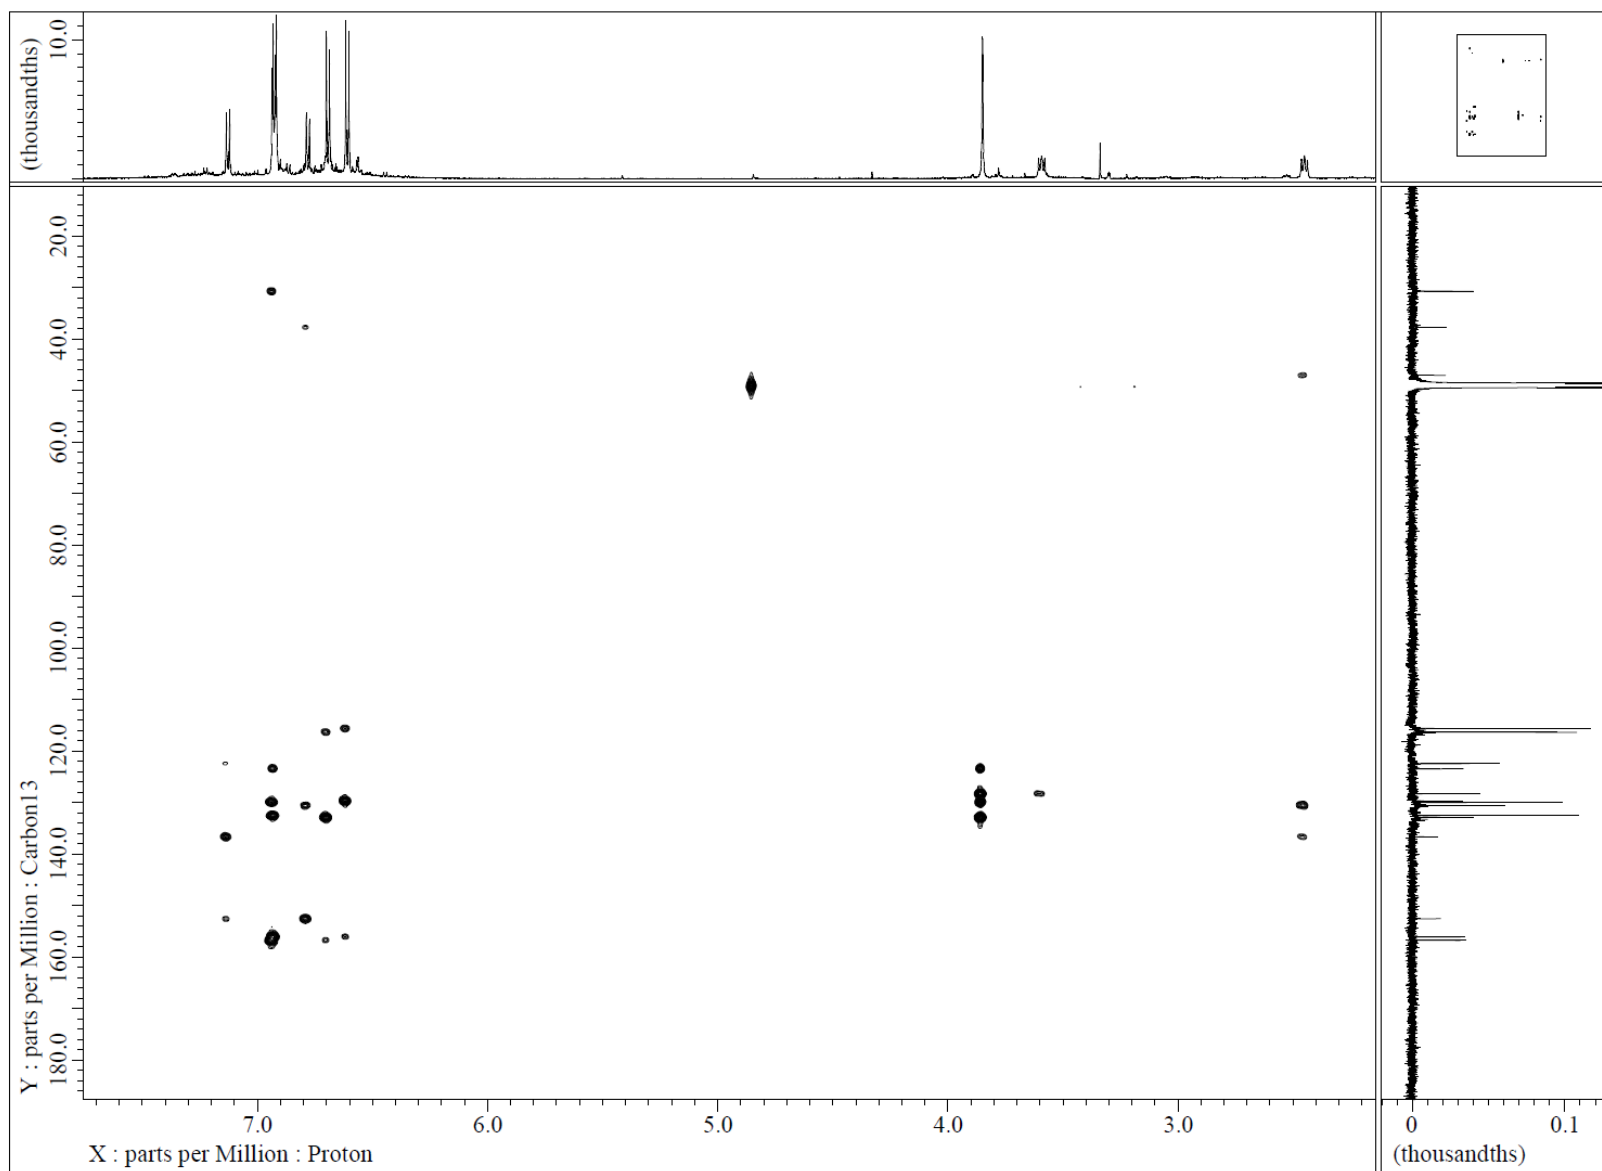

**Figure S3g.** gHMBC (methanol-*d*<sub>4</sub>) spectrum expansion of denigrin J (**3**)

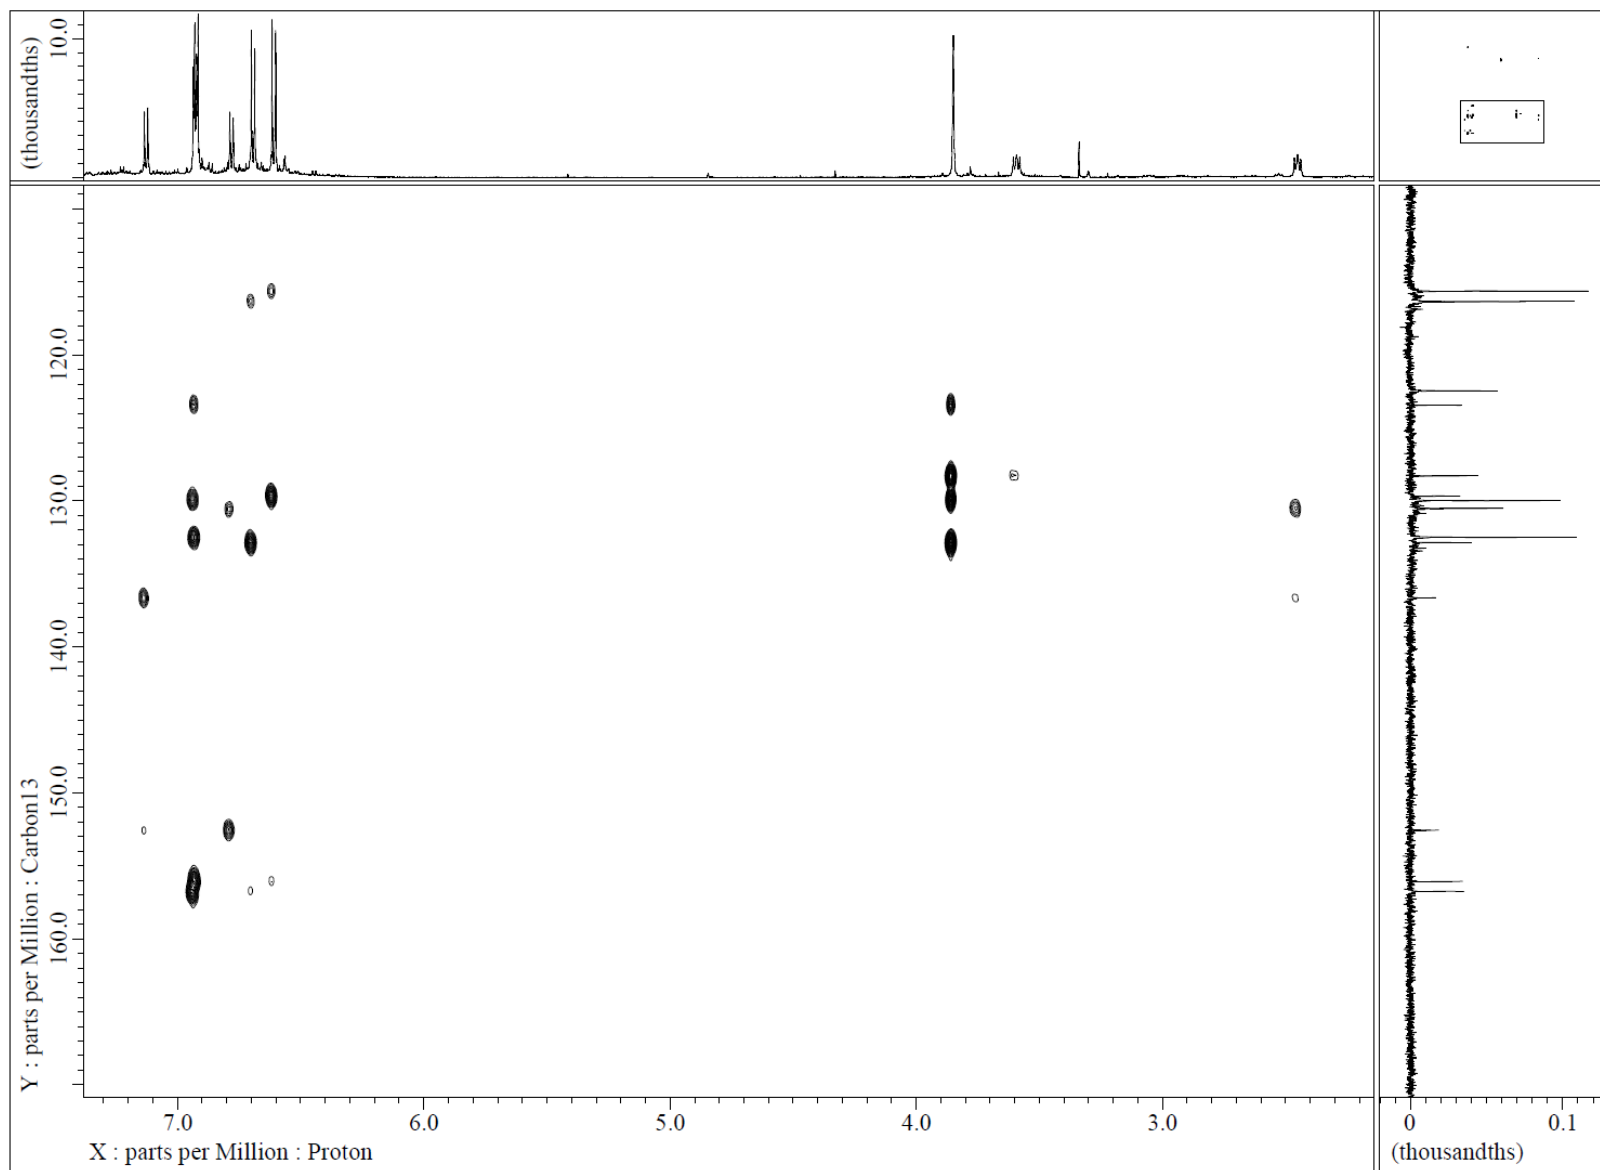

**Figure S3h.** HRESIMS spectrum of denigrin J (**3**) in negative ion mode

**Acquisition Parameter**

|             |          |                    |          |                    |        |
|-------------|----------|--------------------|----------|--------------------|--------|
| Source Type | ESI      | Ion Polarity       | Negative | Set Corrector Fill | 46 V   |
| n/a         | n/a      | Set Capillary Exit | -150.0 V | Set Pulsar Pull    | 800 V  |
| Scan Begin  | 50 m/z   | Set Hexapole RF    | 80.0 V   | Set Pulsar Push    | 800 V  |
| Scan End    | 1500 m/z | Set Skimmer 1      | -50.0 V  | Set Reflector      | 1700 V |
|             |          | Set Hexapole 1     | -25.0 V  | Set Flight Tube    | 8600 V |
|             |          |                    |          | Set Detector TOF   | 2250 V |

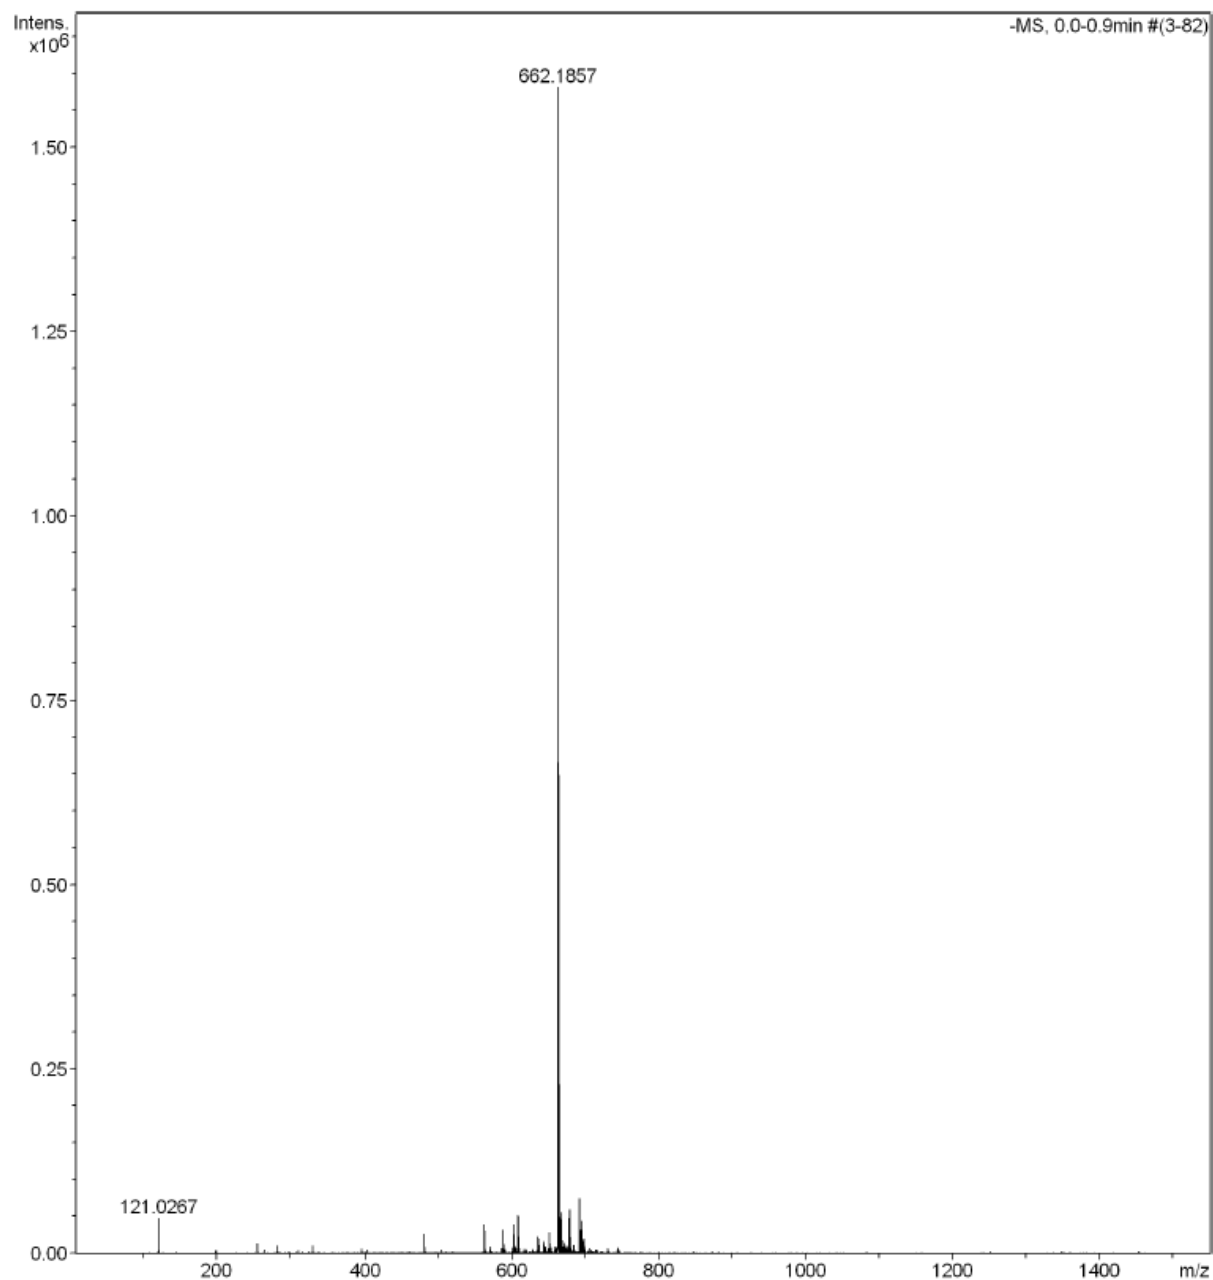

**Figure S4a.**  $^1\text{H}$  NMR (methanol- $d_4$ , 600 MHz) spectrum of denigrin K (**4**)

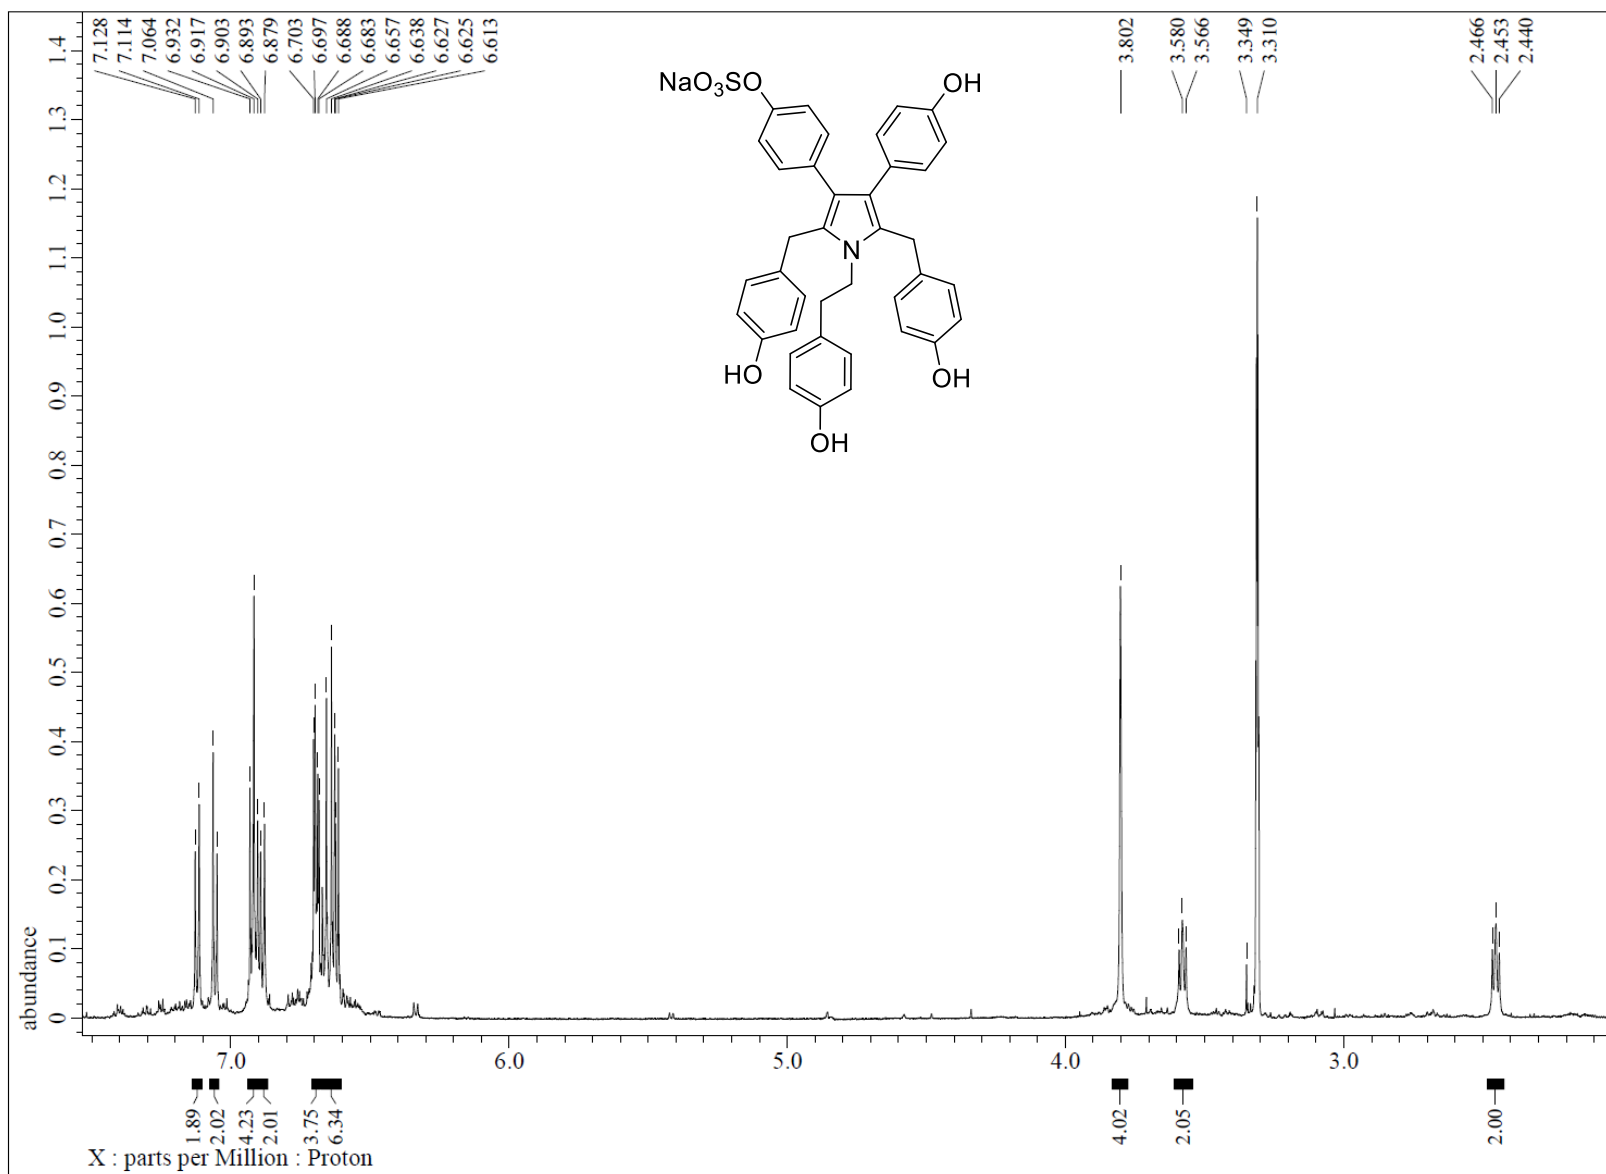

**Figure S4b.**  $^{13}\text{C}$  NMR (methanol- $d_4$ , 150 MHz) spectrum of denigrin K (**4**)

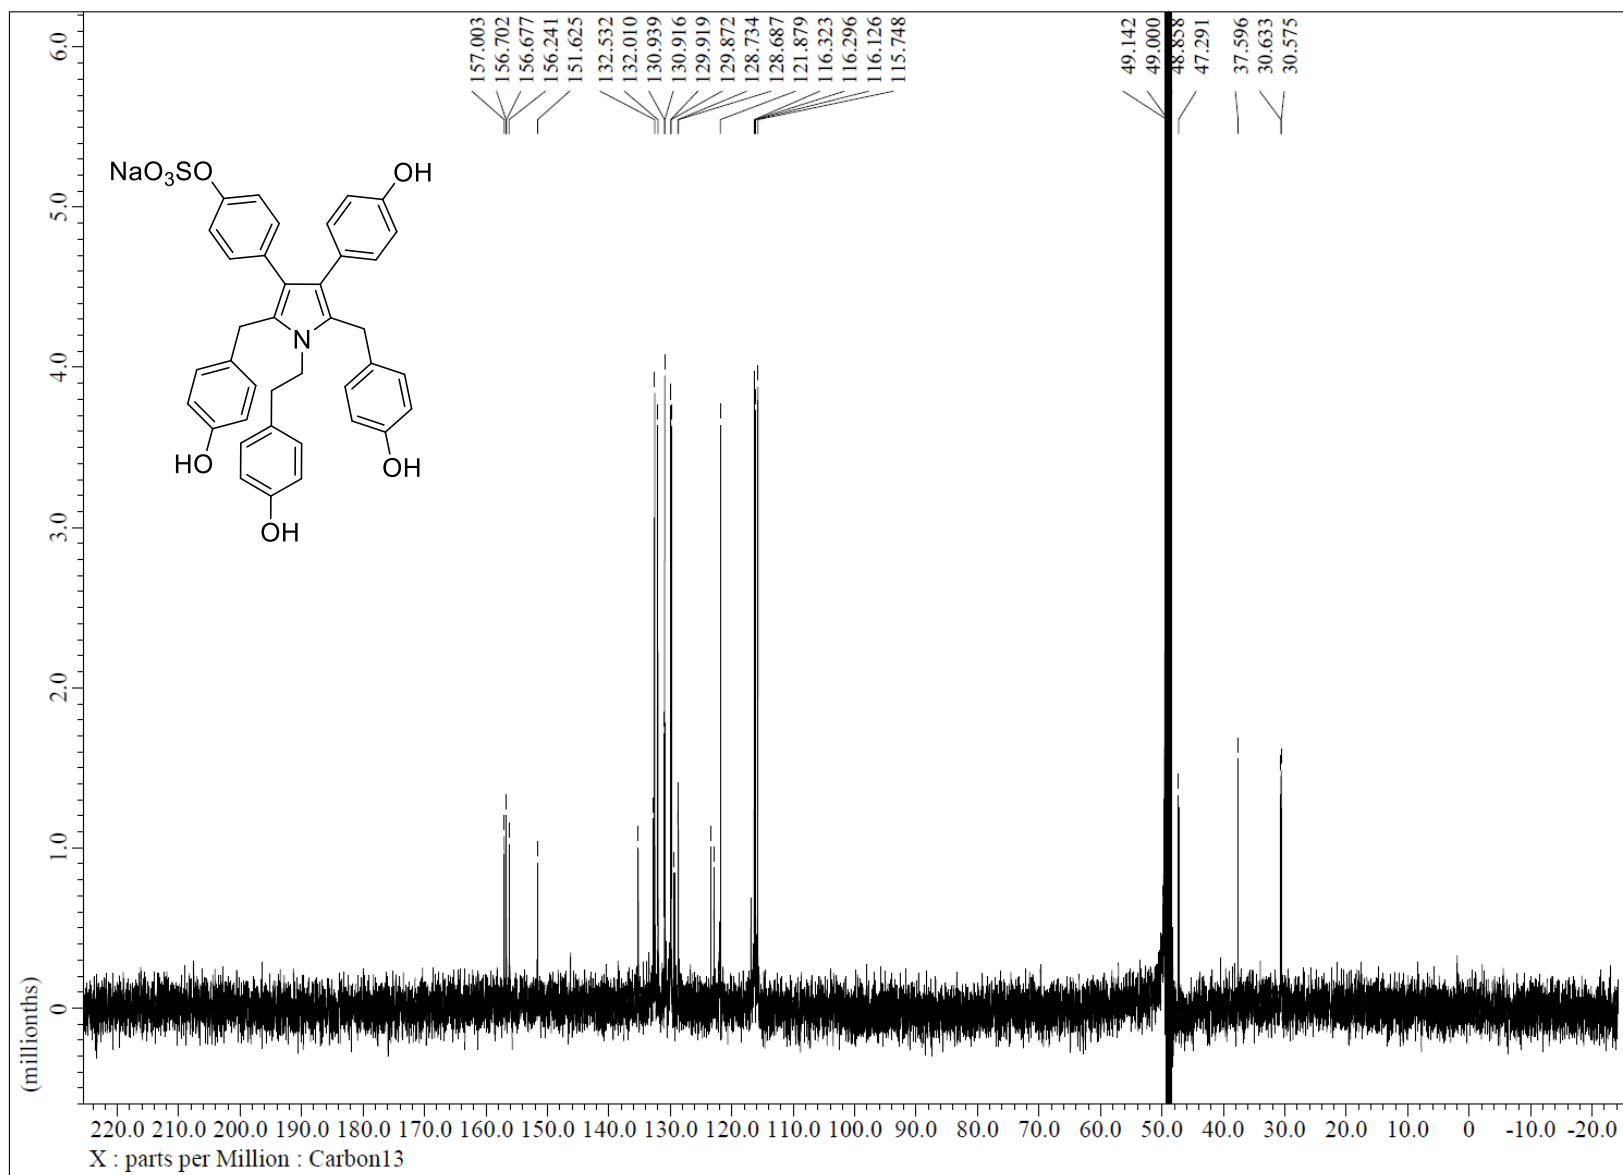

**Figure S4c.**  $^{13}\text{C}$  NMR (methanol- $d_4$ , 150 MHz) spectrum expansion 1 of denigrin K (**4**)

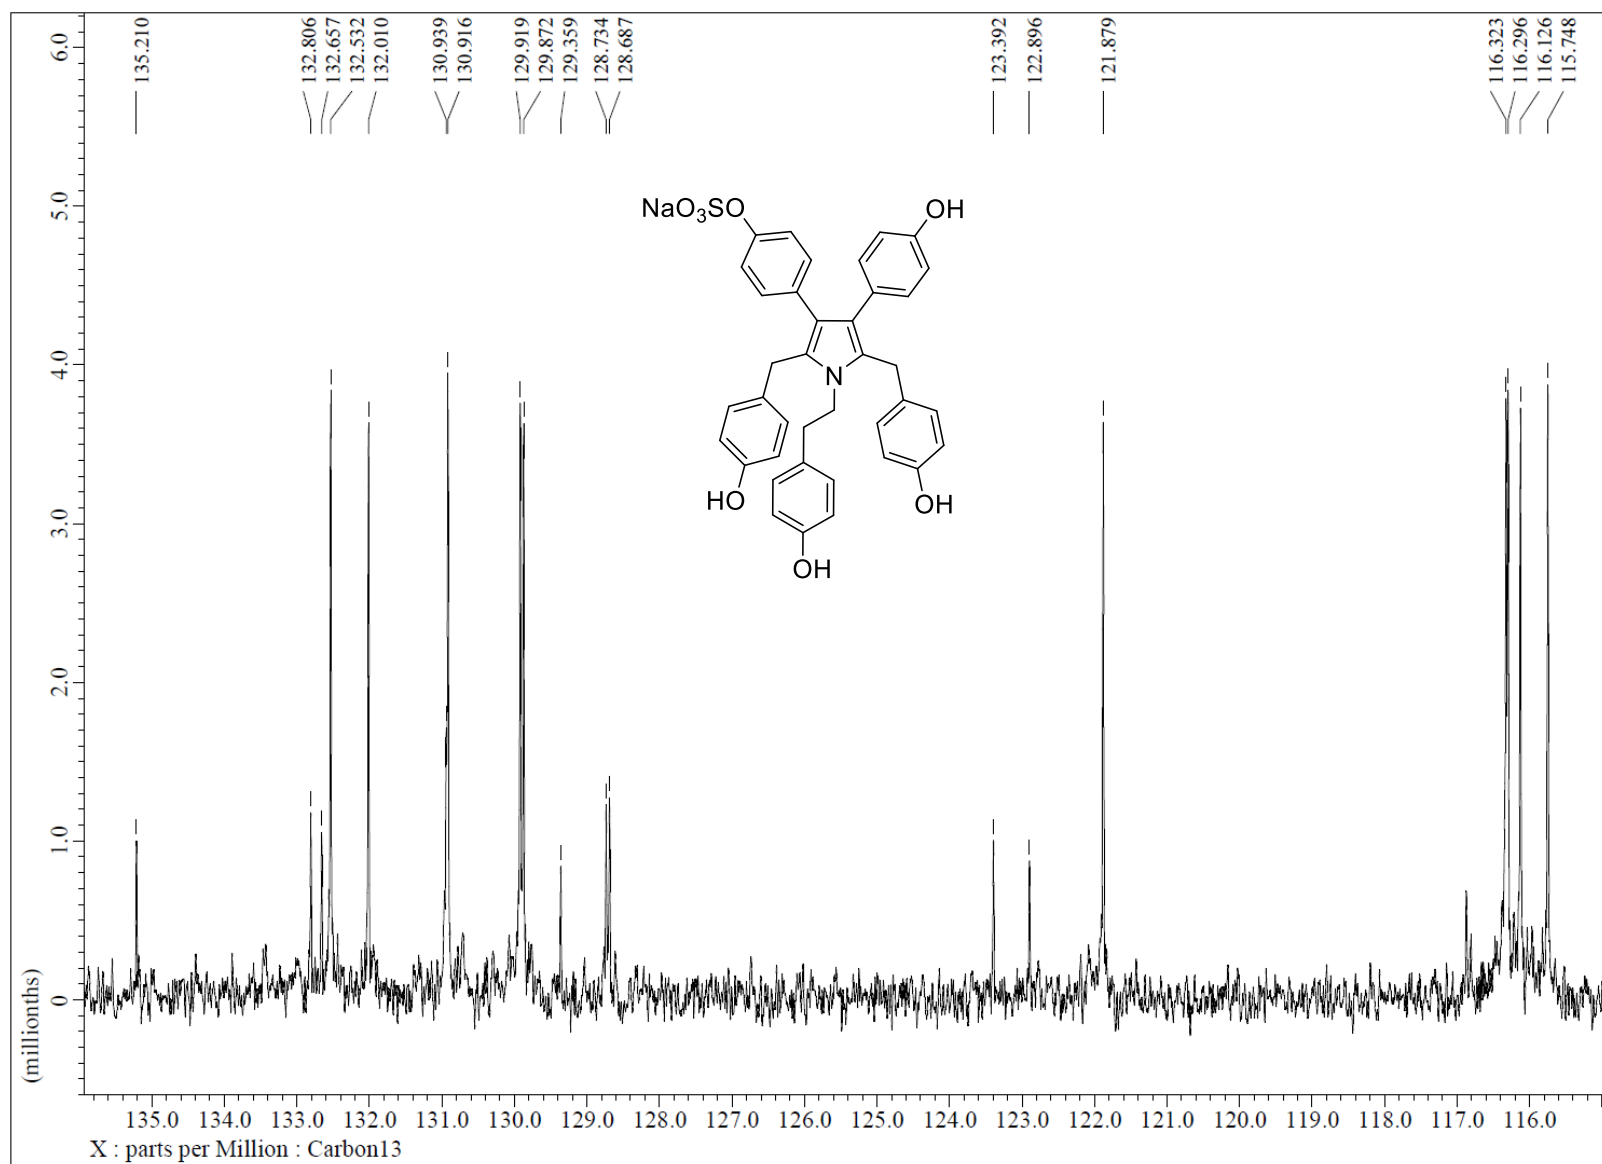

**Figure S4d.**  $^{13}\text{C}$  NMR (methanol- $d_4$ , 150 MHz) spectrum expansion 2 of denigrin K (**4**)

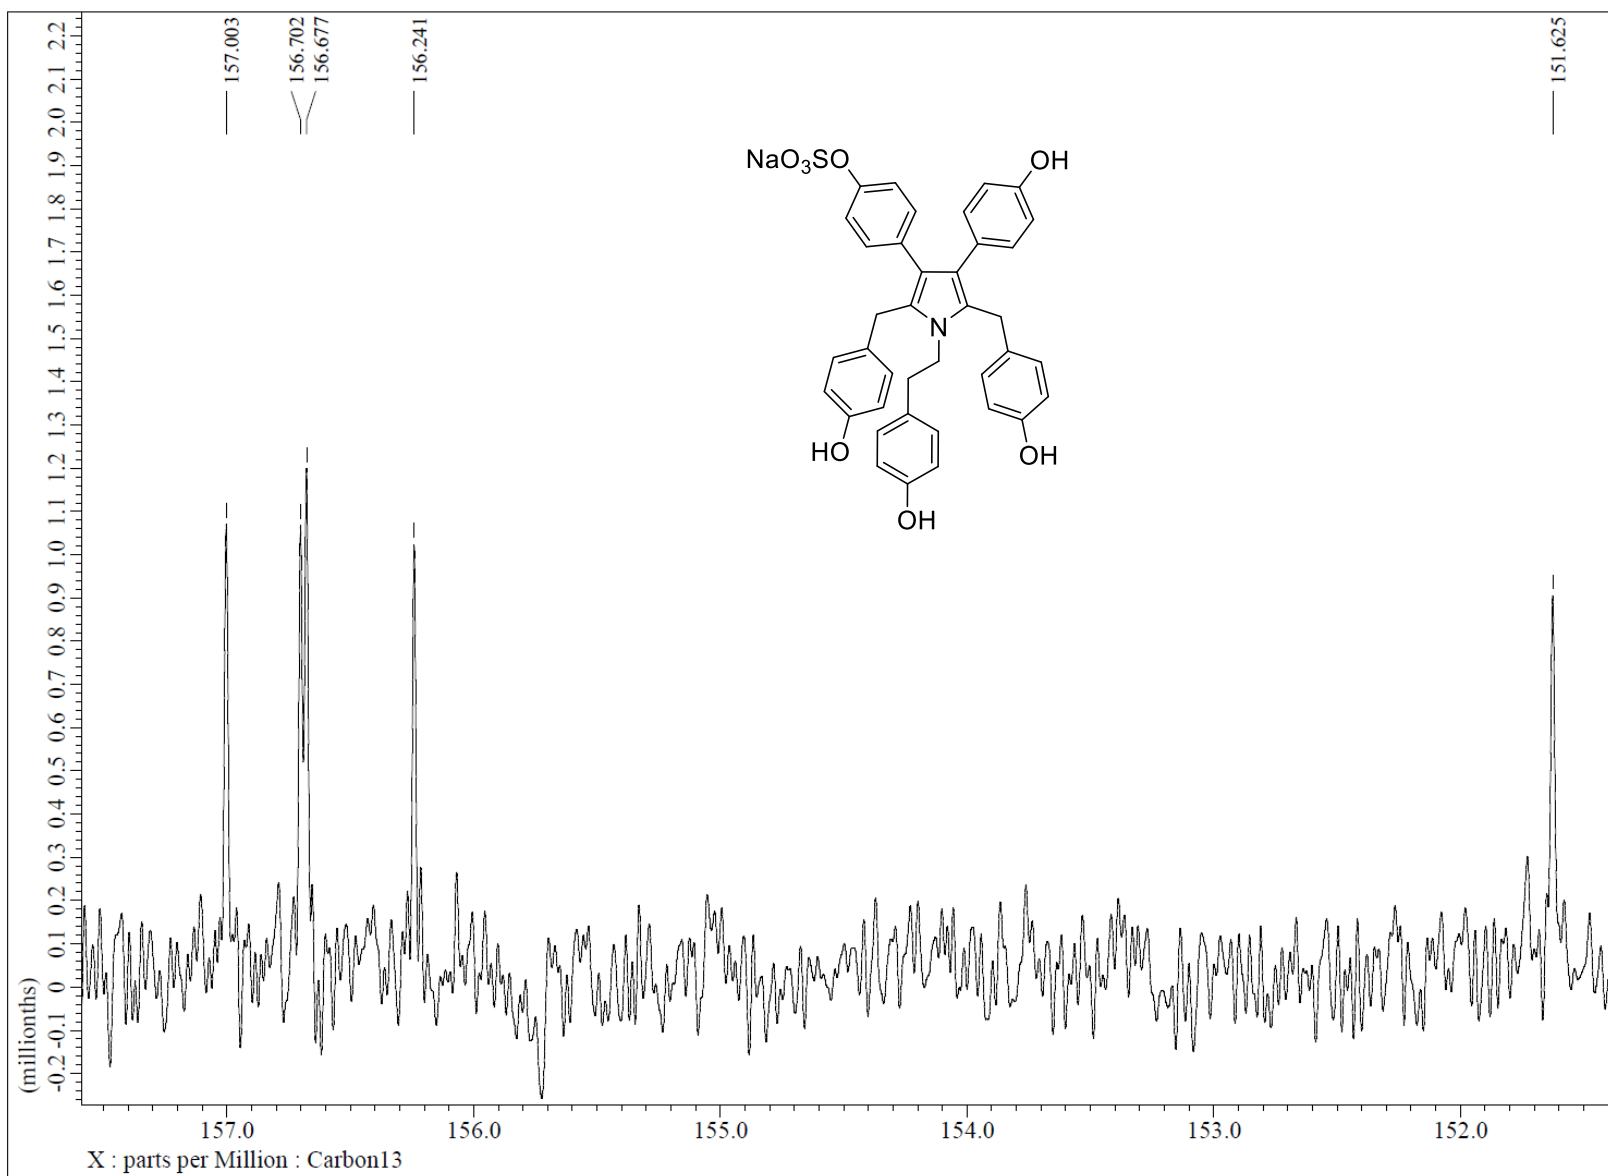

**Figure S4e.** COSY (methanol-*d*4) spectrum of denigrin K (**4**)

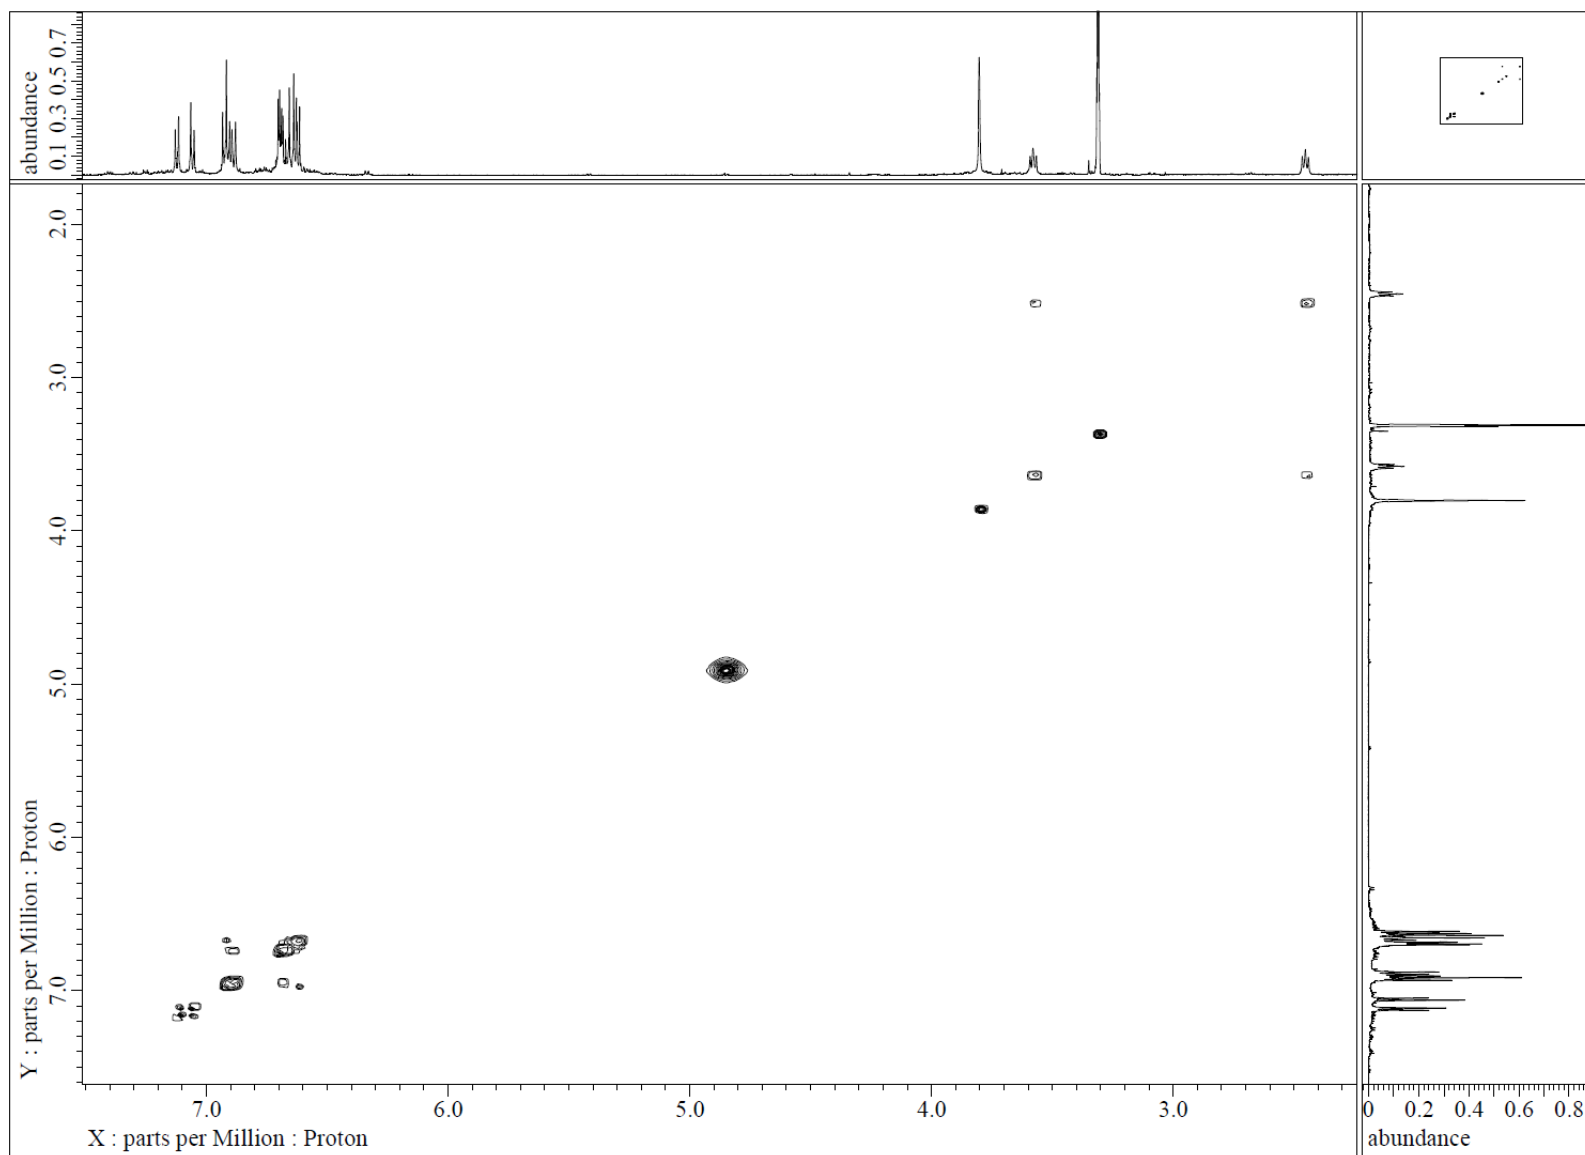

**Figure S4f.** gHSQC (methanol-*d*4) spectrum of denigrin K (**4**)

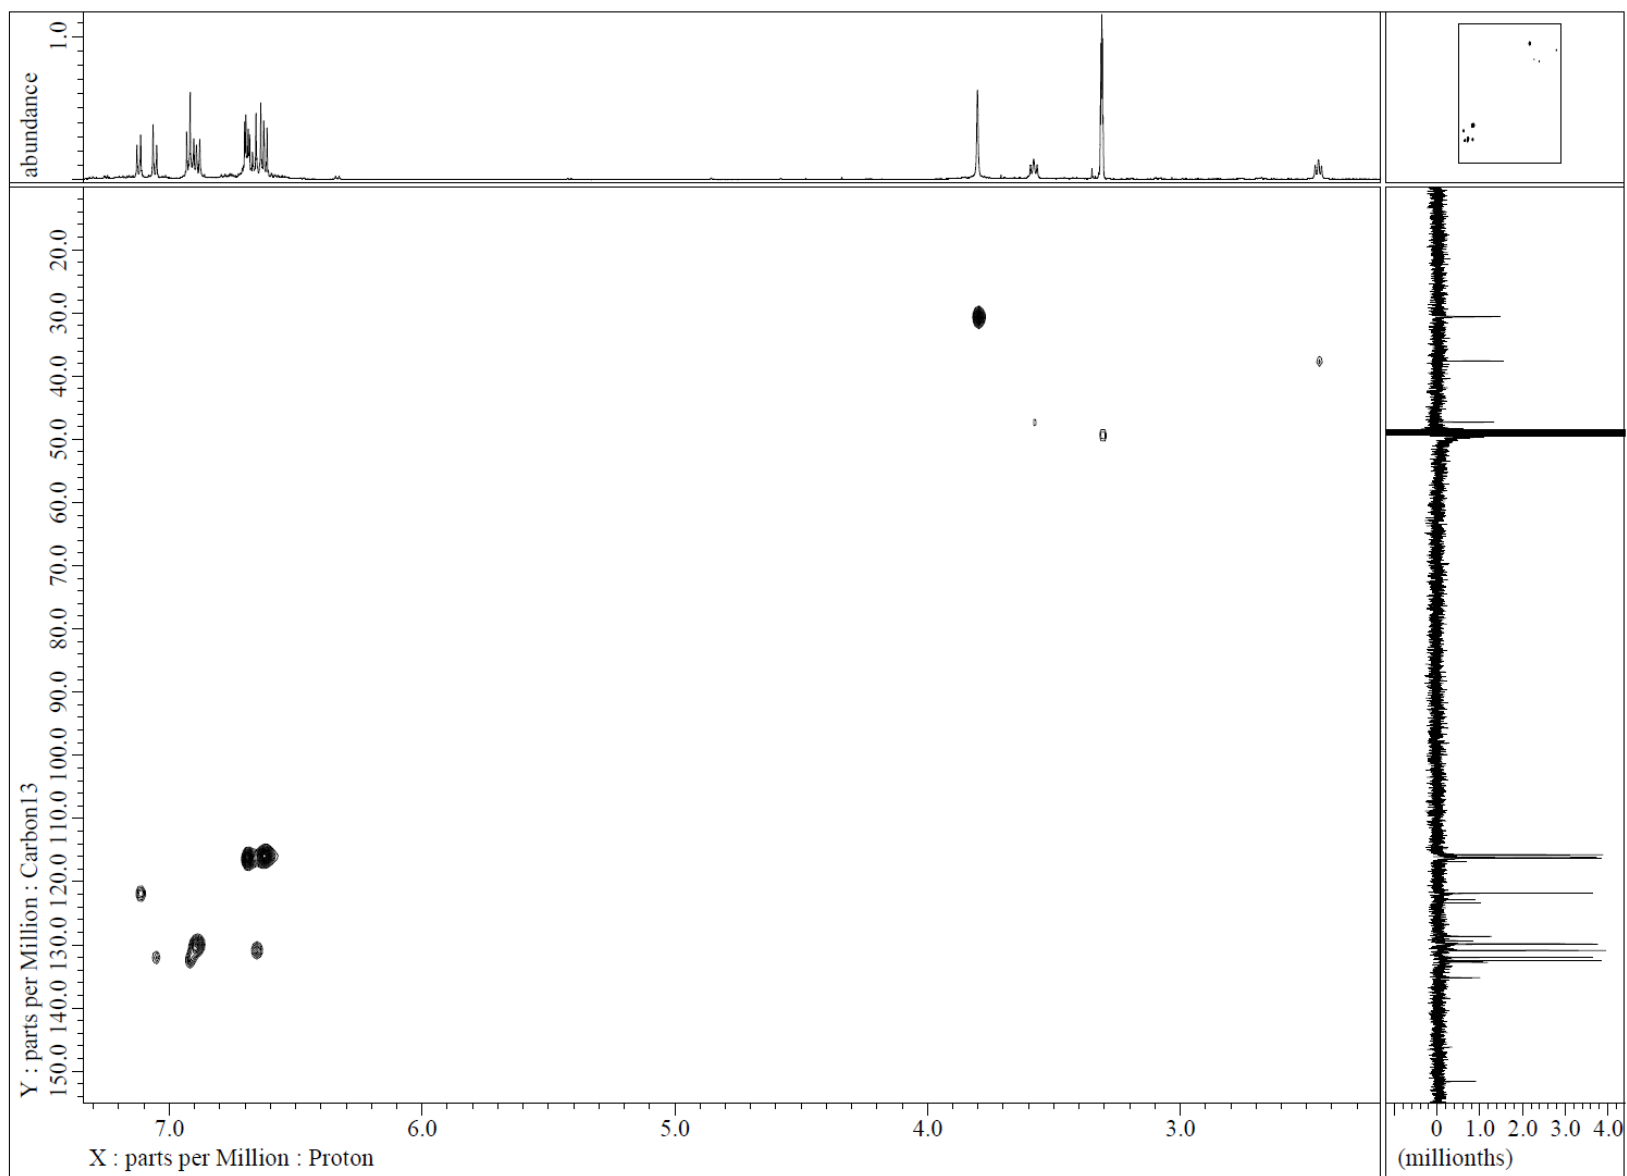

**Figure S4g.** gHMBC (methanol-*d*4) spectrum of denigrin K (**4**)

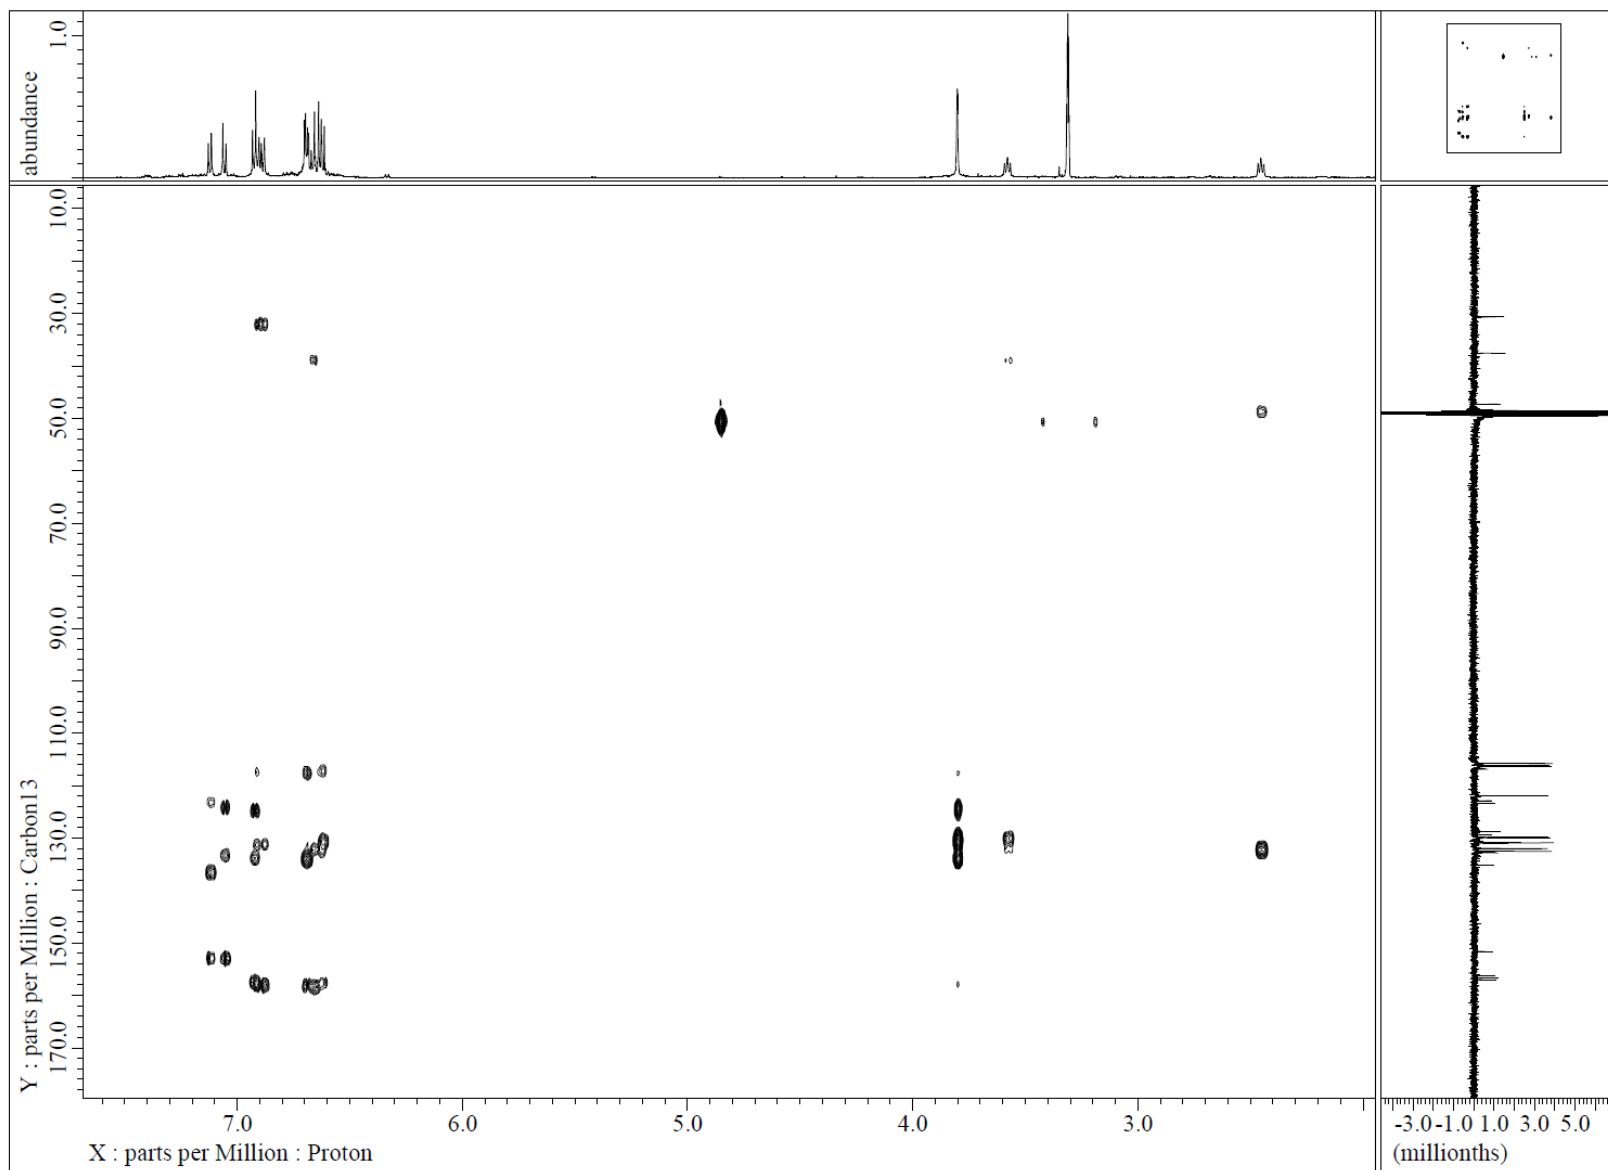

**Figure S4h.** gHMBC (methanol-*d*<sub>4</sub>) spectrum expansion of denigrin K (**4**)

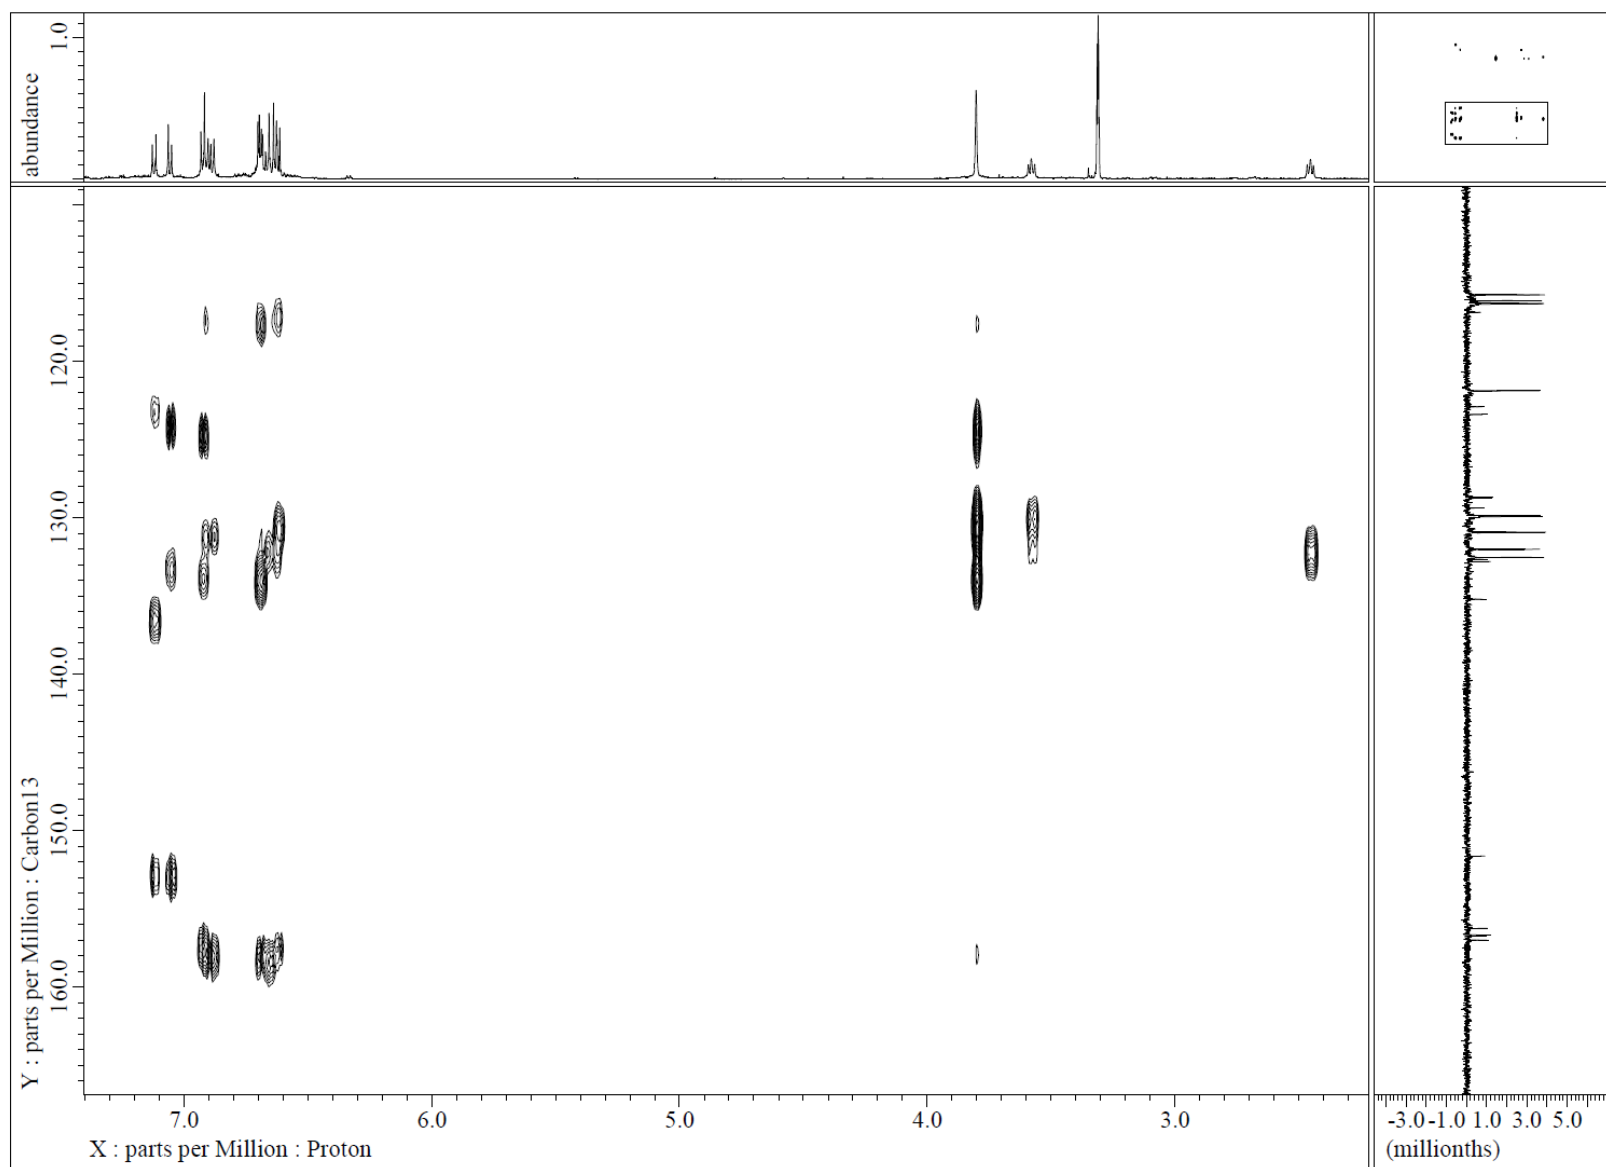

**Figure S4i.** HRESIMS spectrum of denigrin K (**4**) in negative ion mode

**Acquisition Parameter**

|             |          |                    |          |                    |        |
|-------------|----------|--------------------|----------|--------------------|--------|
| Source Type | ESI      | Ion Polarity       | Negative | Set Corrector Fill | 46 V   |
| n/a         | n/a      | Set Capillary Exit | -150.0 V | Set Pulsar Pull    | 800 V  |
| Scan Begin  | 50 m/z   | Set Hexapole RF    | 80.0 V   | Set Pulsar Push    | 800 V  |
| Scan End    | 1500 m/z | Set Skimmer 1      | -50.0 V  | Set Reflector      | 1700 V |
|             |          | Set Hexapole 1     | -25.0 V  | Set Flight Tube    | 8600 V |
|             |          |                    |          | Set Detector TOF   | 2250 V |

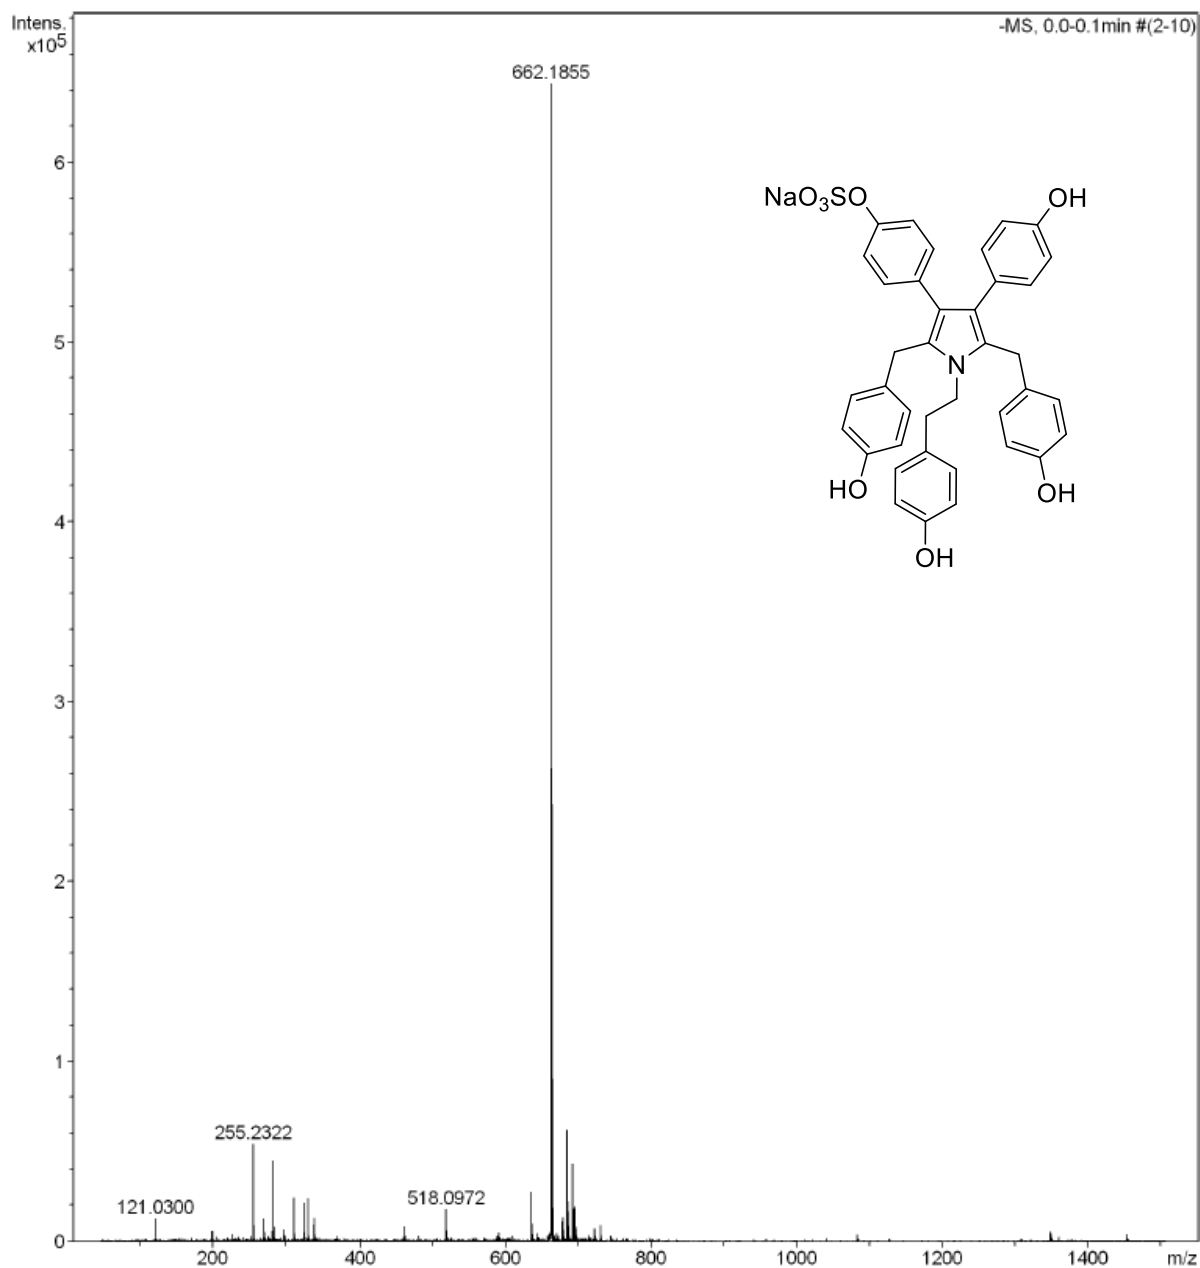

**Figure S5a.**  $^1\text{H}$  NMR (methanol- $d_4$ , 600 MHz) spectrum of denigrin L (5)

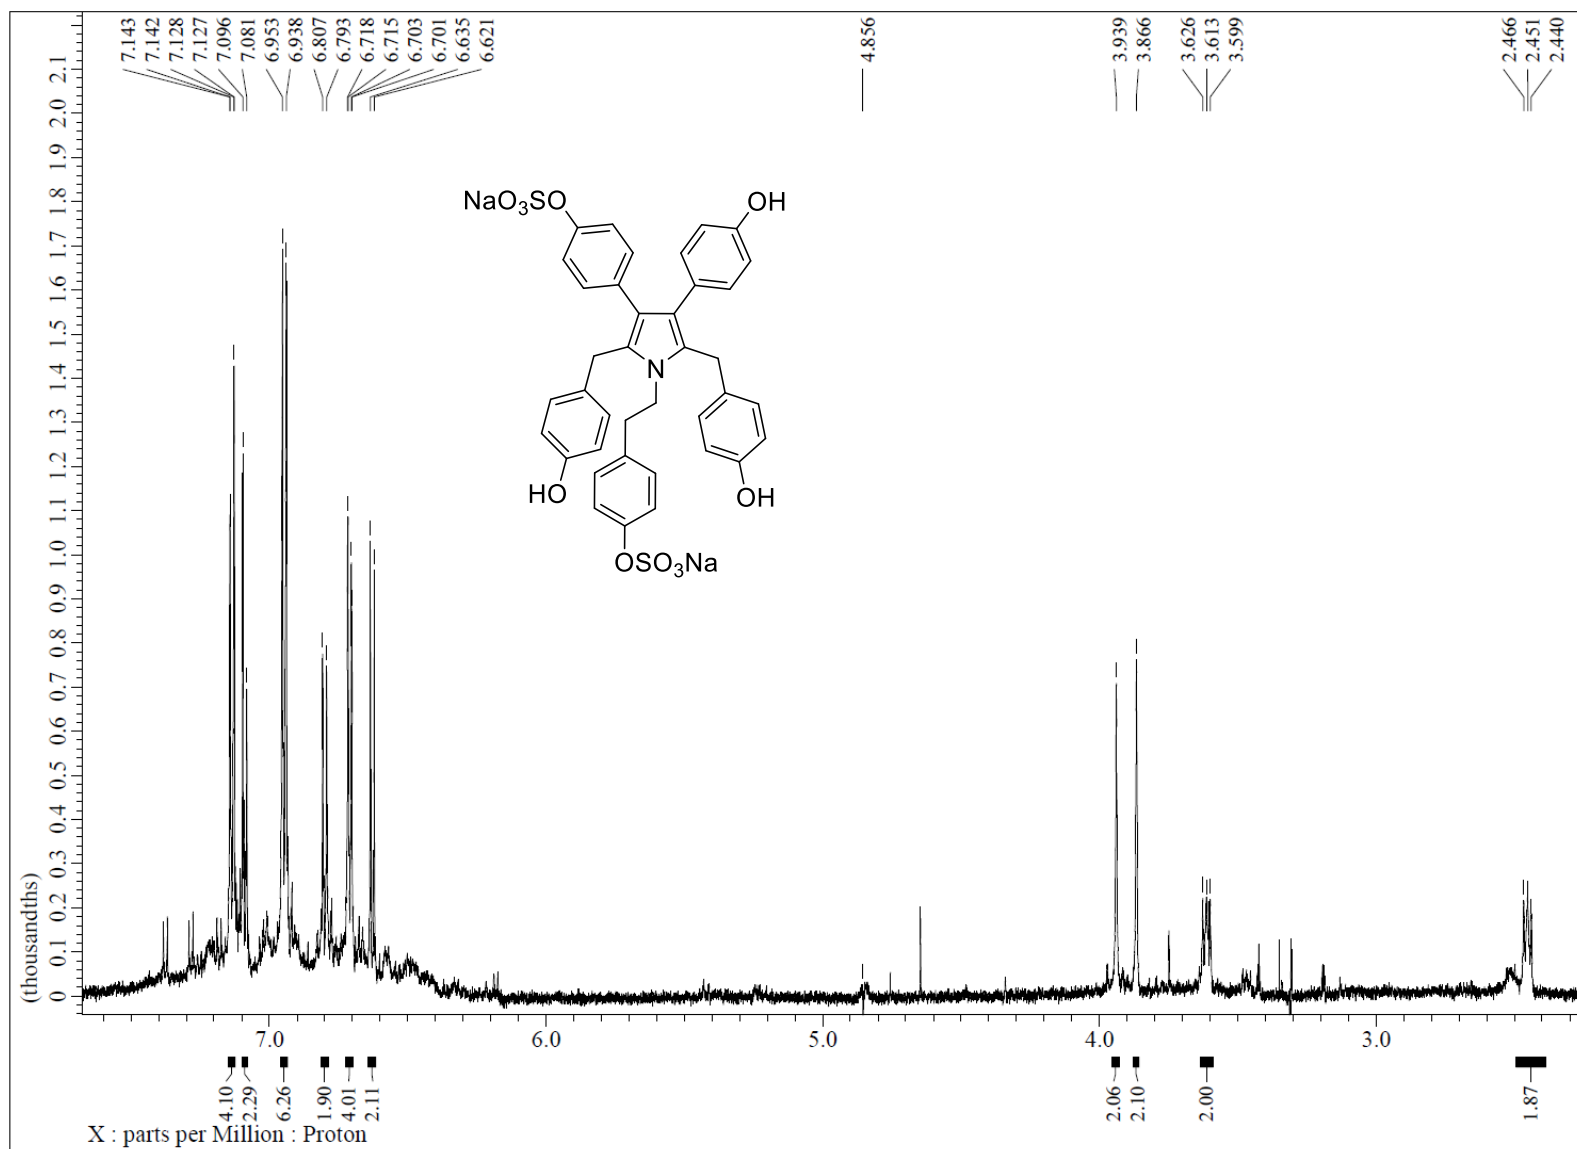

**Figure S5b.**  $^{13}\text{C}$  NMR (methanol- $d_4$ , 150 MHz) spectrum of denigrin L (5)

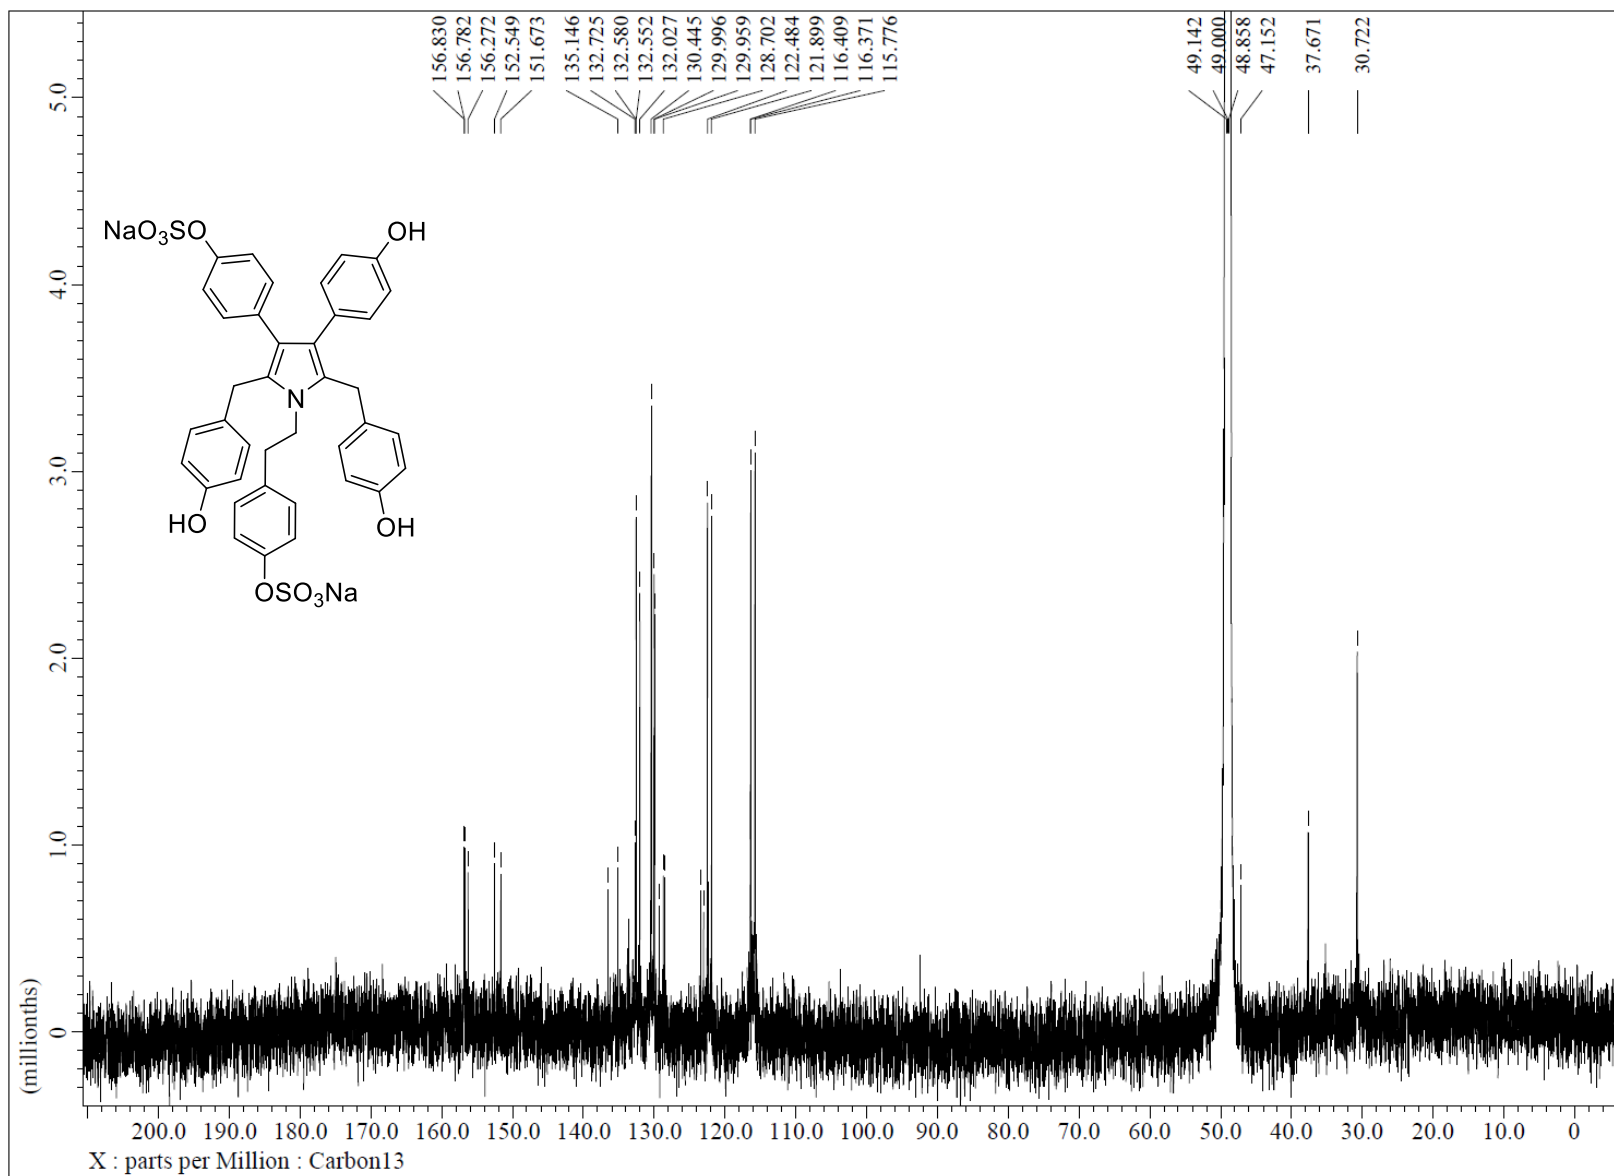

**Figure S5c.**  $^{13}\text{C}$  NMR (methanol- $d_4$ , 150 MHz) spectrum expansion of denigrin L (**5**)

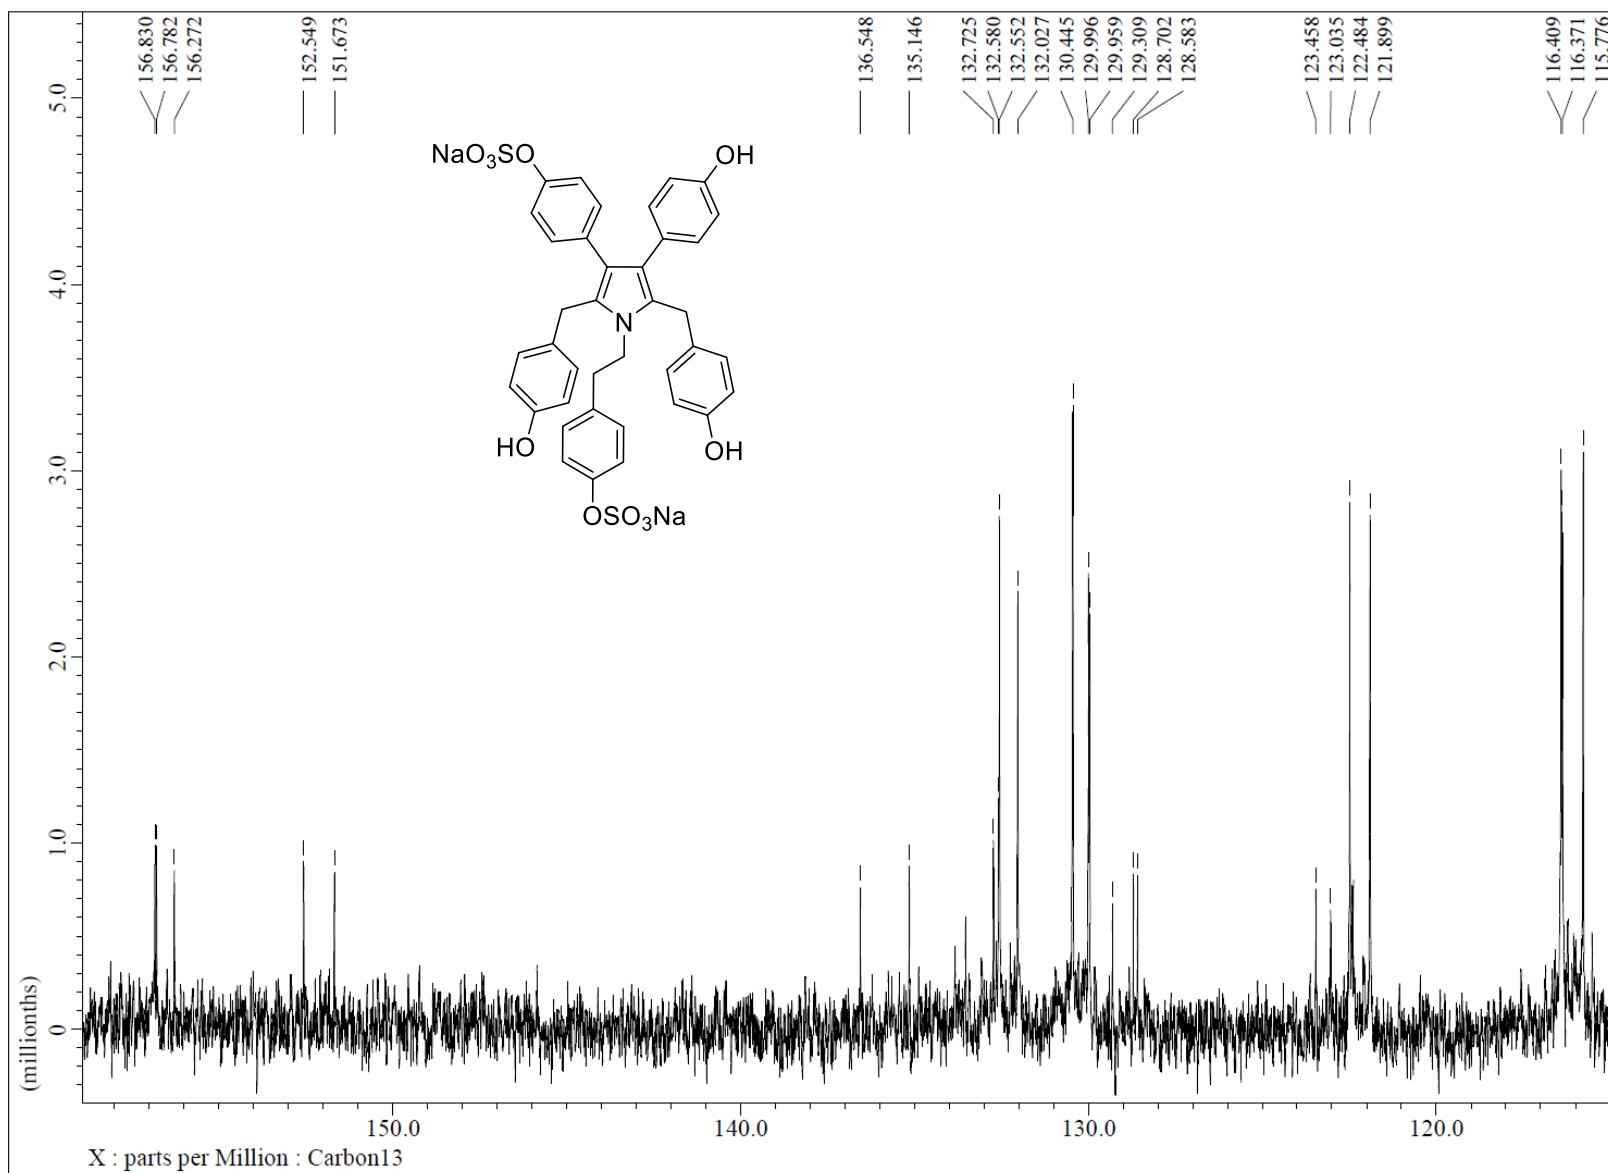

**Figure S5d.** COSY (methanol-*d*<sub>4</sub>) spectrum of denigrin L (5)

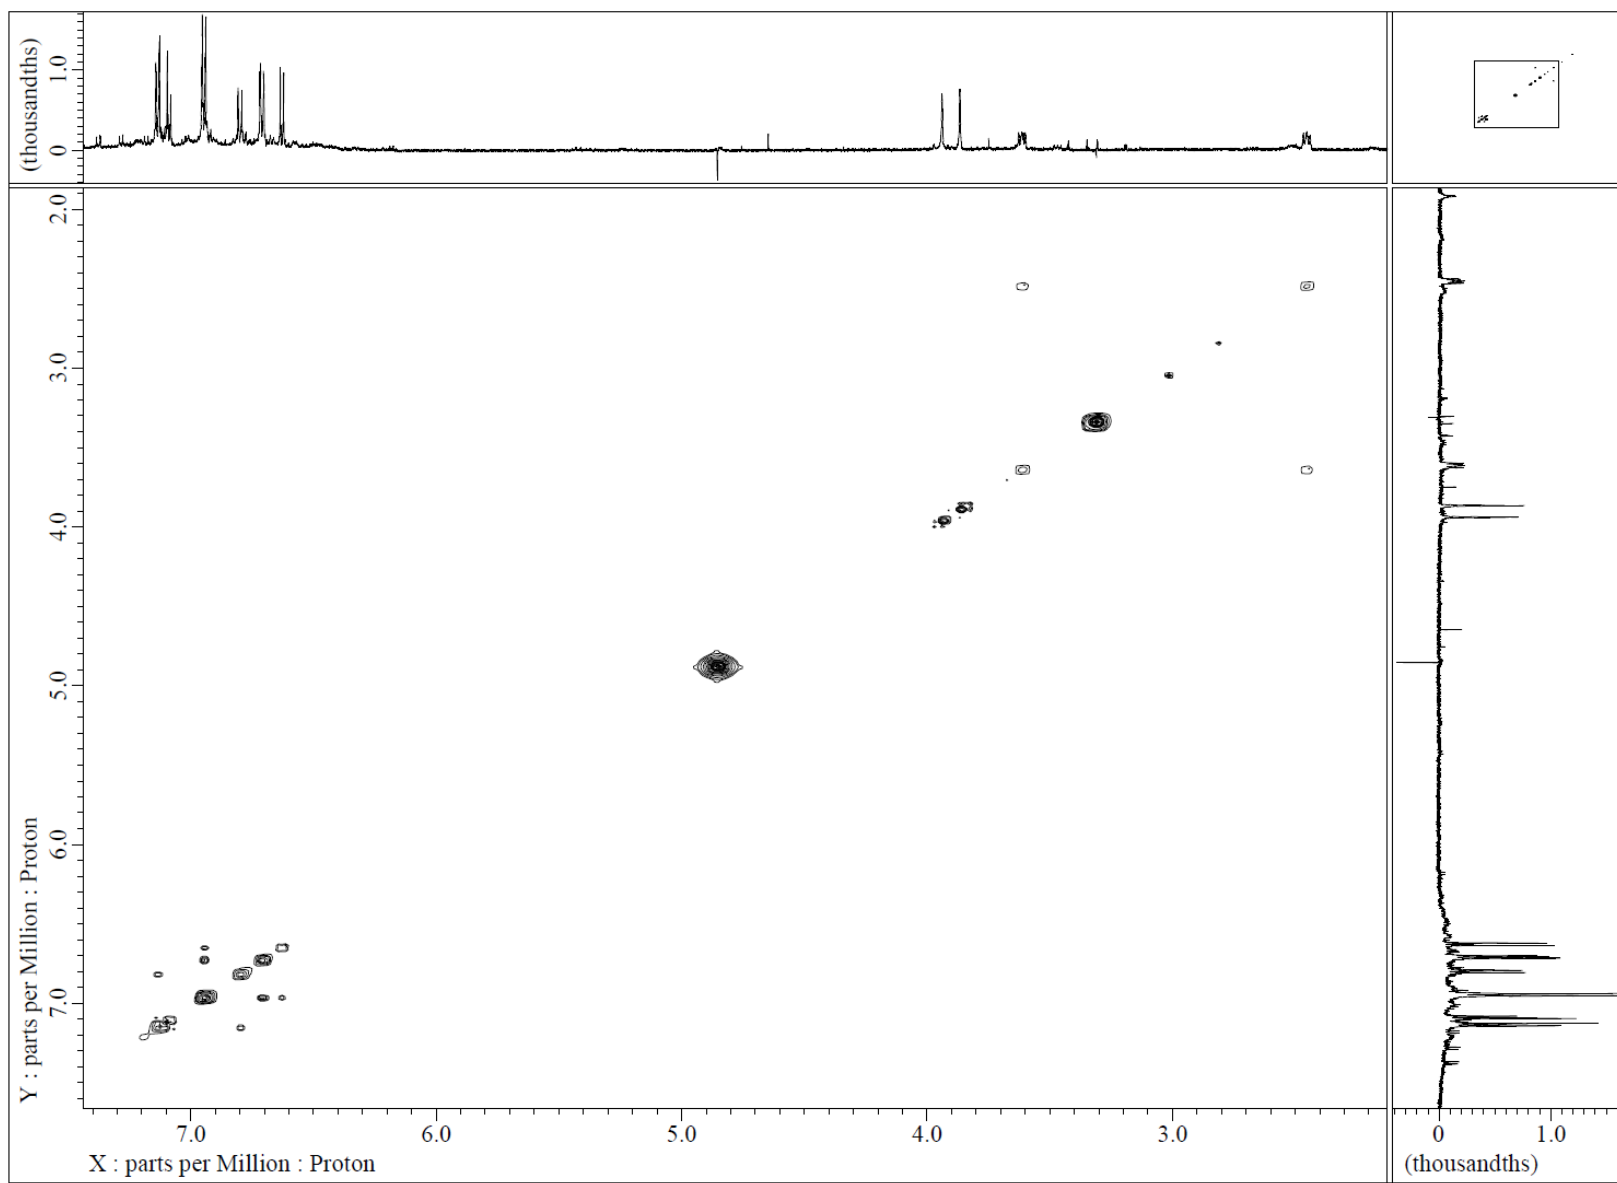

**Figure S5e.** gHSQC (methanol-*d*<sub>4</sub>) spectrum of denigrin L (**5**)

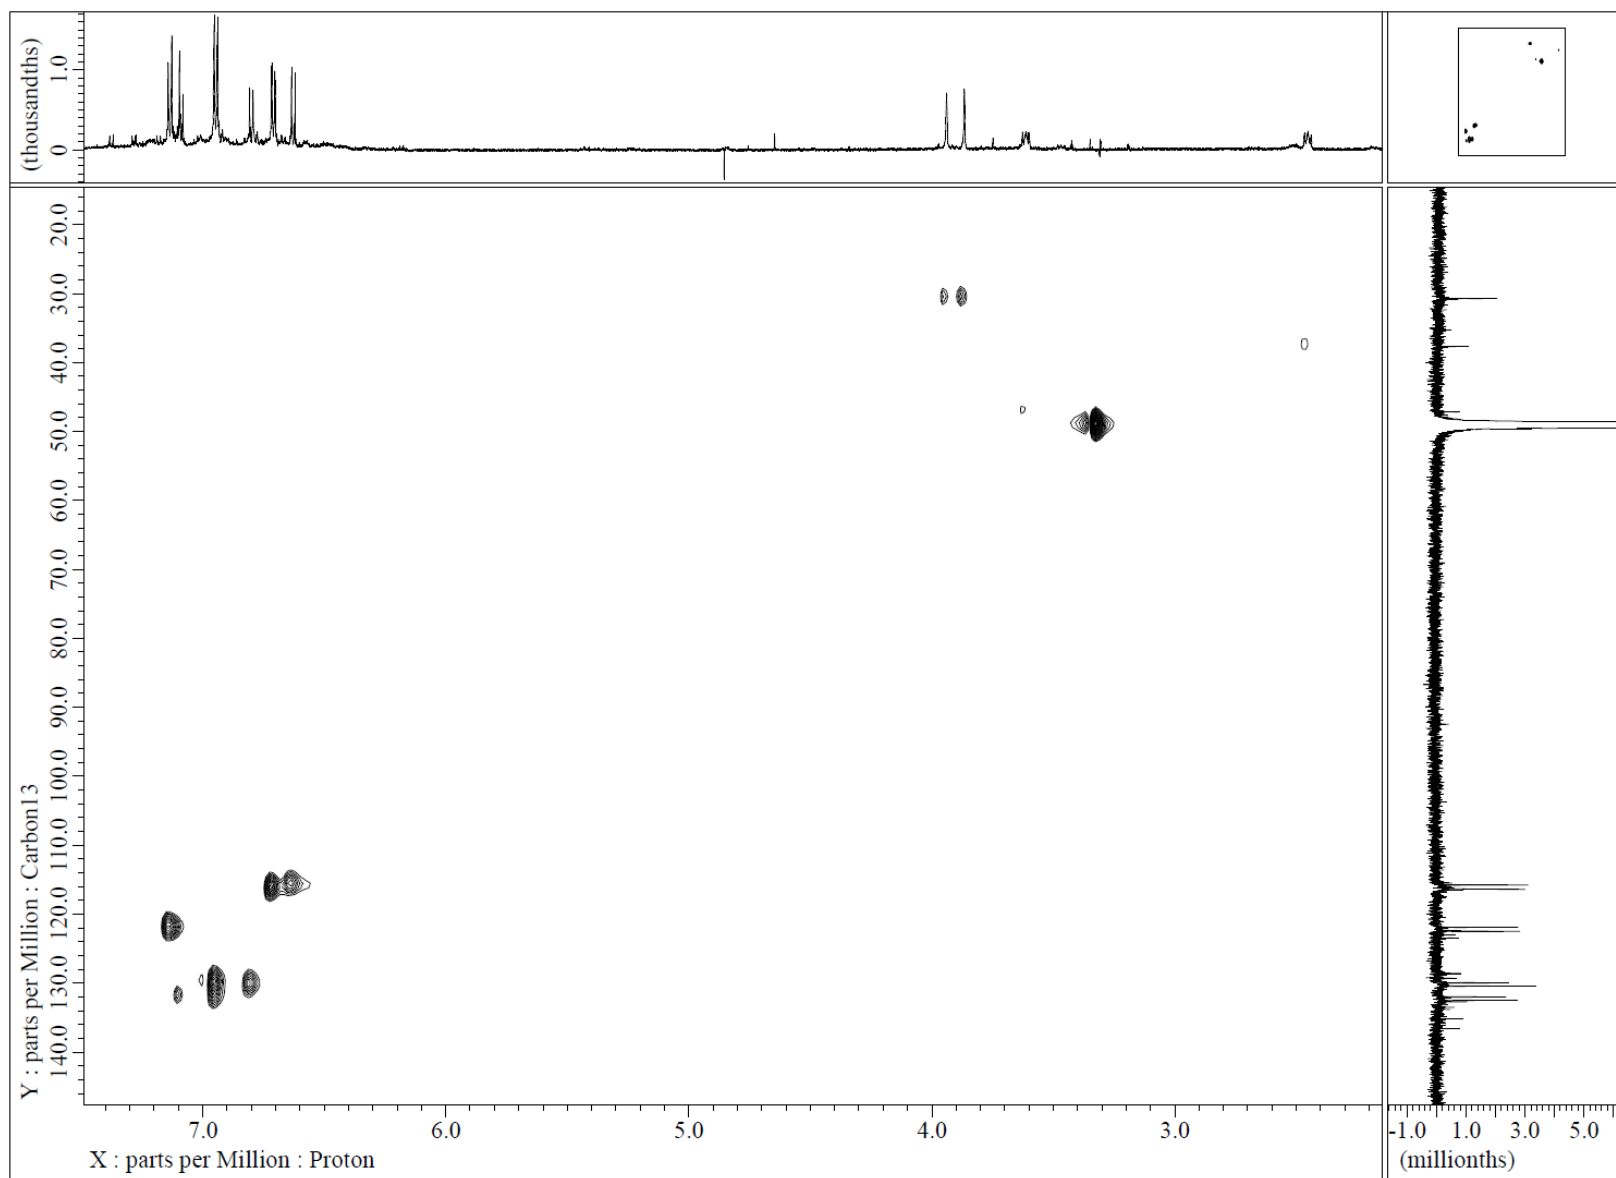

**Figure S5f.** gHMBC (methanol-*d*4) spectrum of denigrin L (**5**)

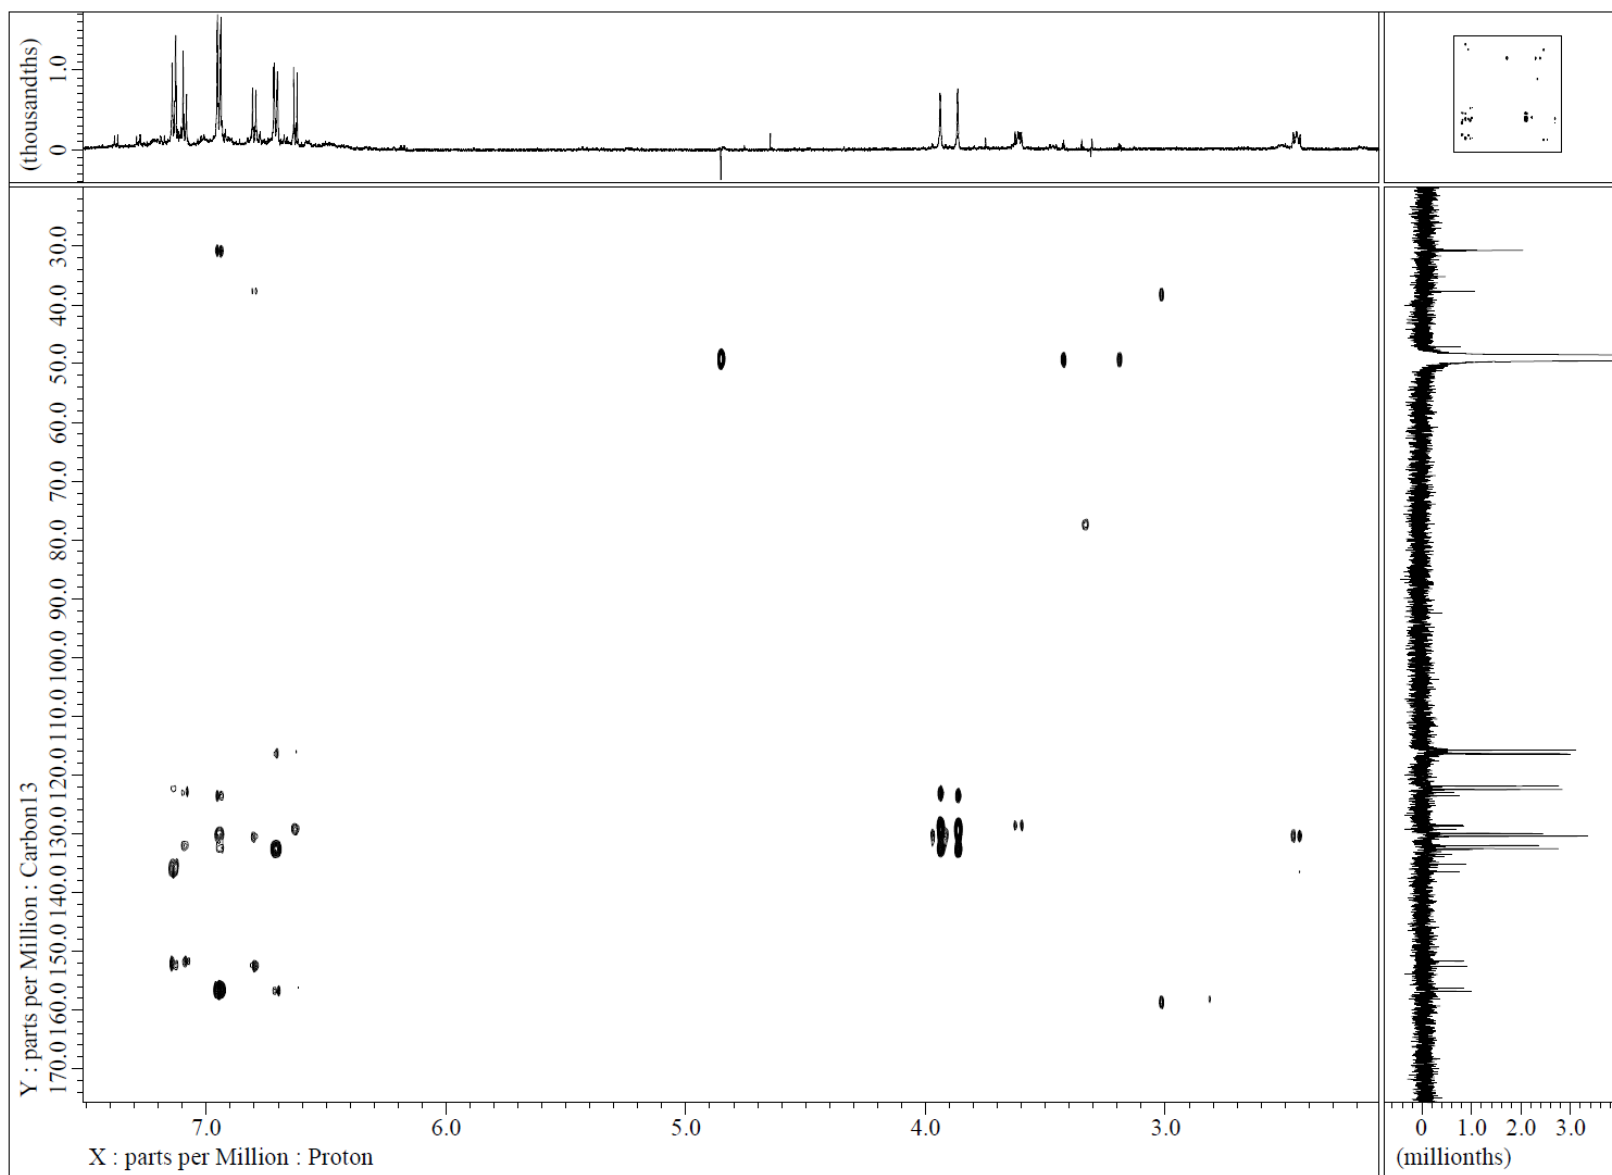

**Figure S5g.** gHMBC (methanol-*d*4) spectrum expansion of denigrin L (**5**)

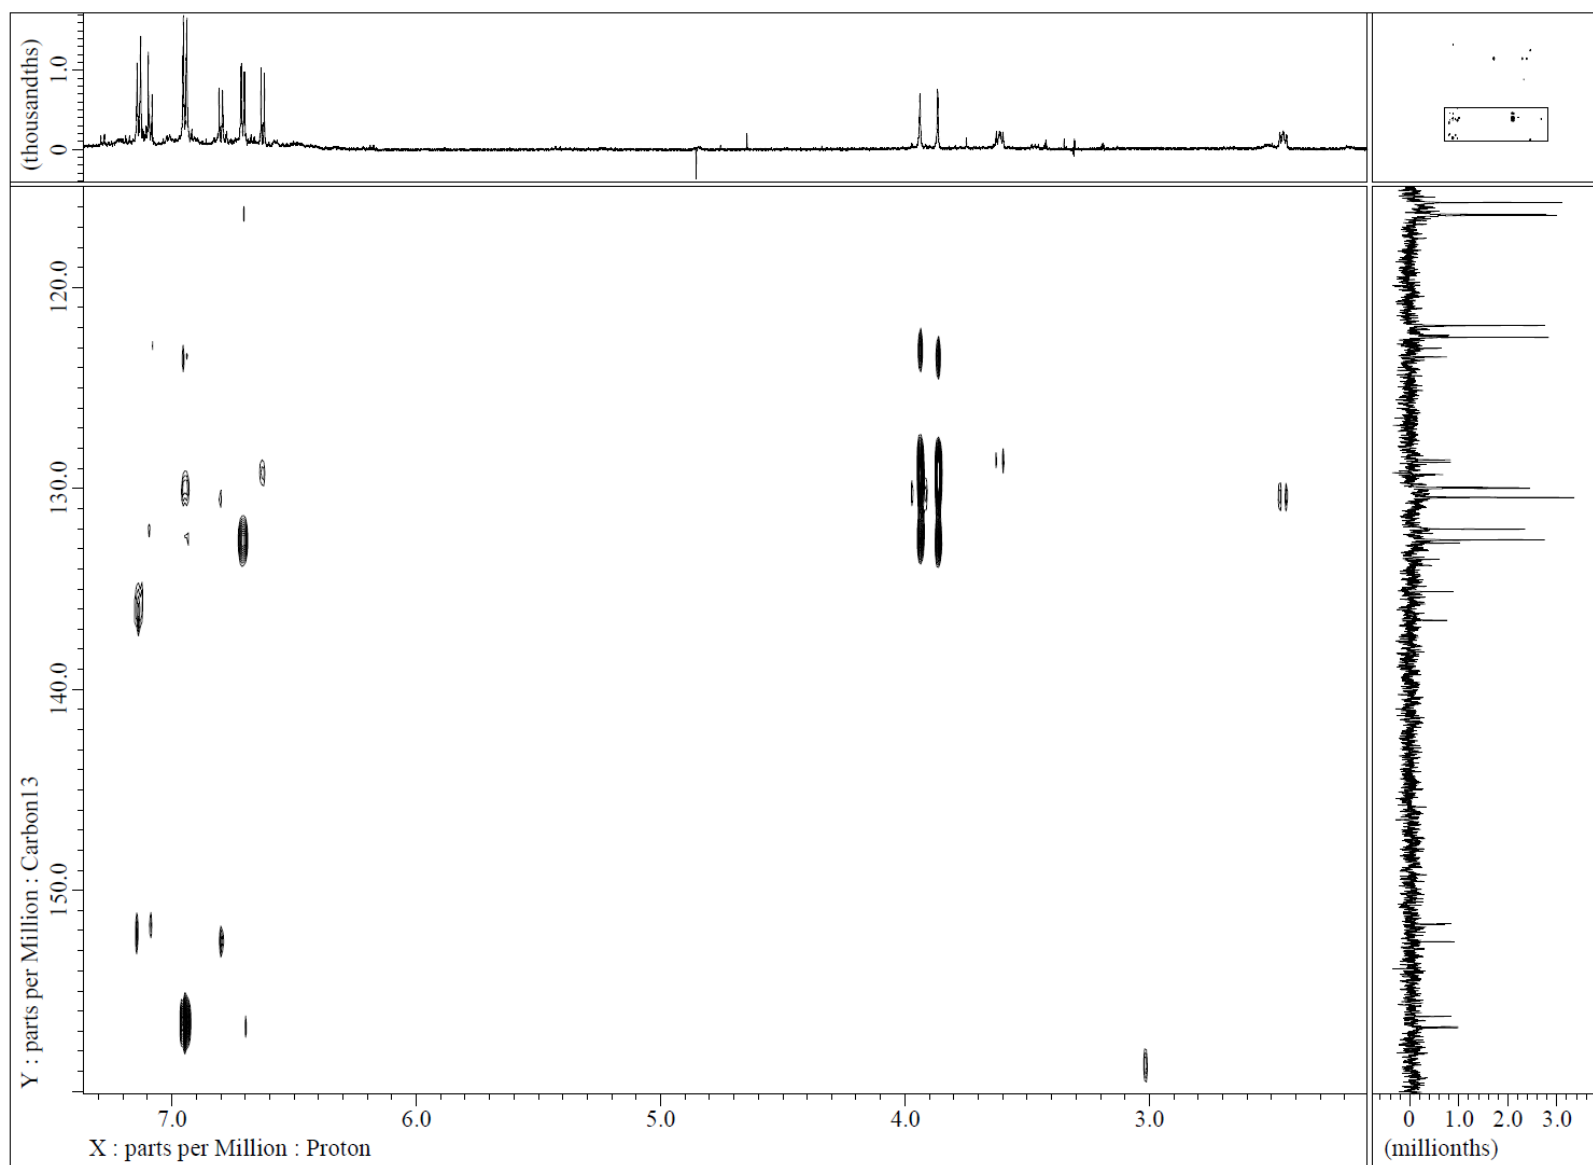

**Figure S5h.** HRESIMS spectrum of denigrin L (**5**) in negative ion mode

**Acquisition Parameter**

Source Type ESI  
n/a n/a  
Scan Begin 50 m/z  
Scan End 1500 m/z

Ion Polarity Negative  
Set Capillary Exit -150.0 V  
Set Hexapole RF 80.0 V  
Set Skimmer 1 -50.0 V  
Set Hexapole 1 -25.0 V

Set Corrector Fill 46 V  
Set Pulsar Pull 800 V  
Set Pulsar Push 800 V  
Set Reflector 1700 V  
Set Flight Tube 8600 V  
Set Detector TOF 2250 V

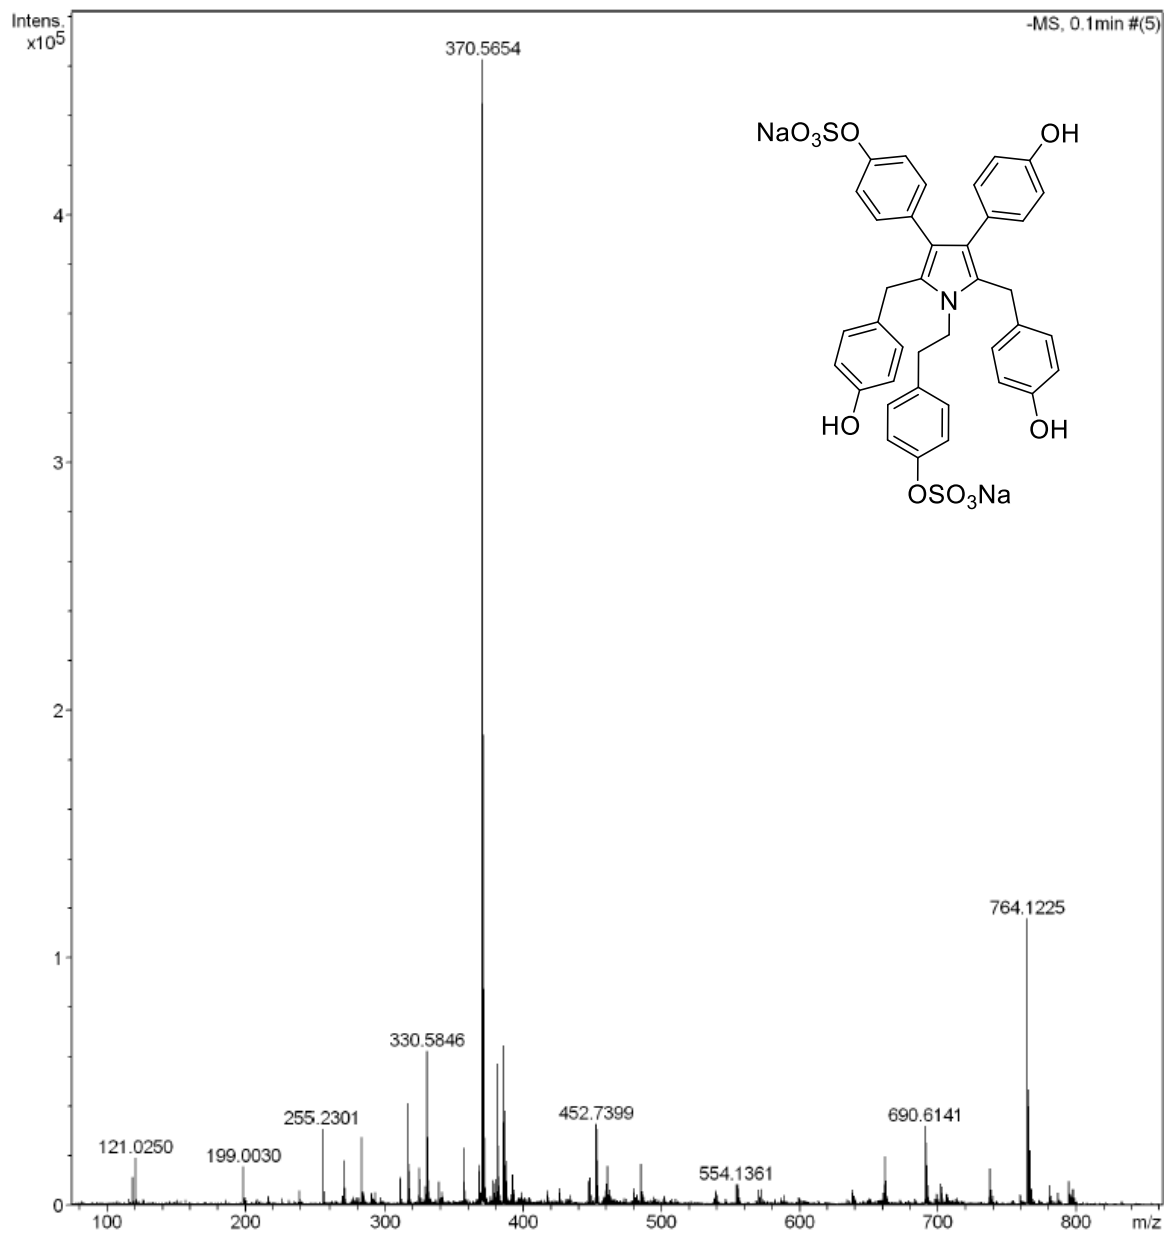

**Figure S6a.**  $^1\text{H}$  NMR (methanol- $d_4$ , 600 MHz) spectrum of denigrin E (**6**)

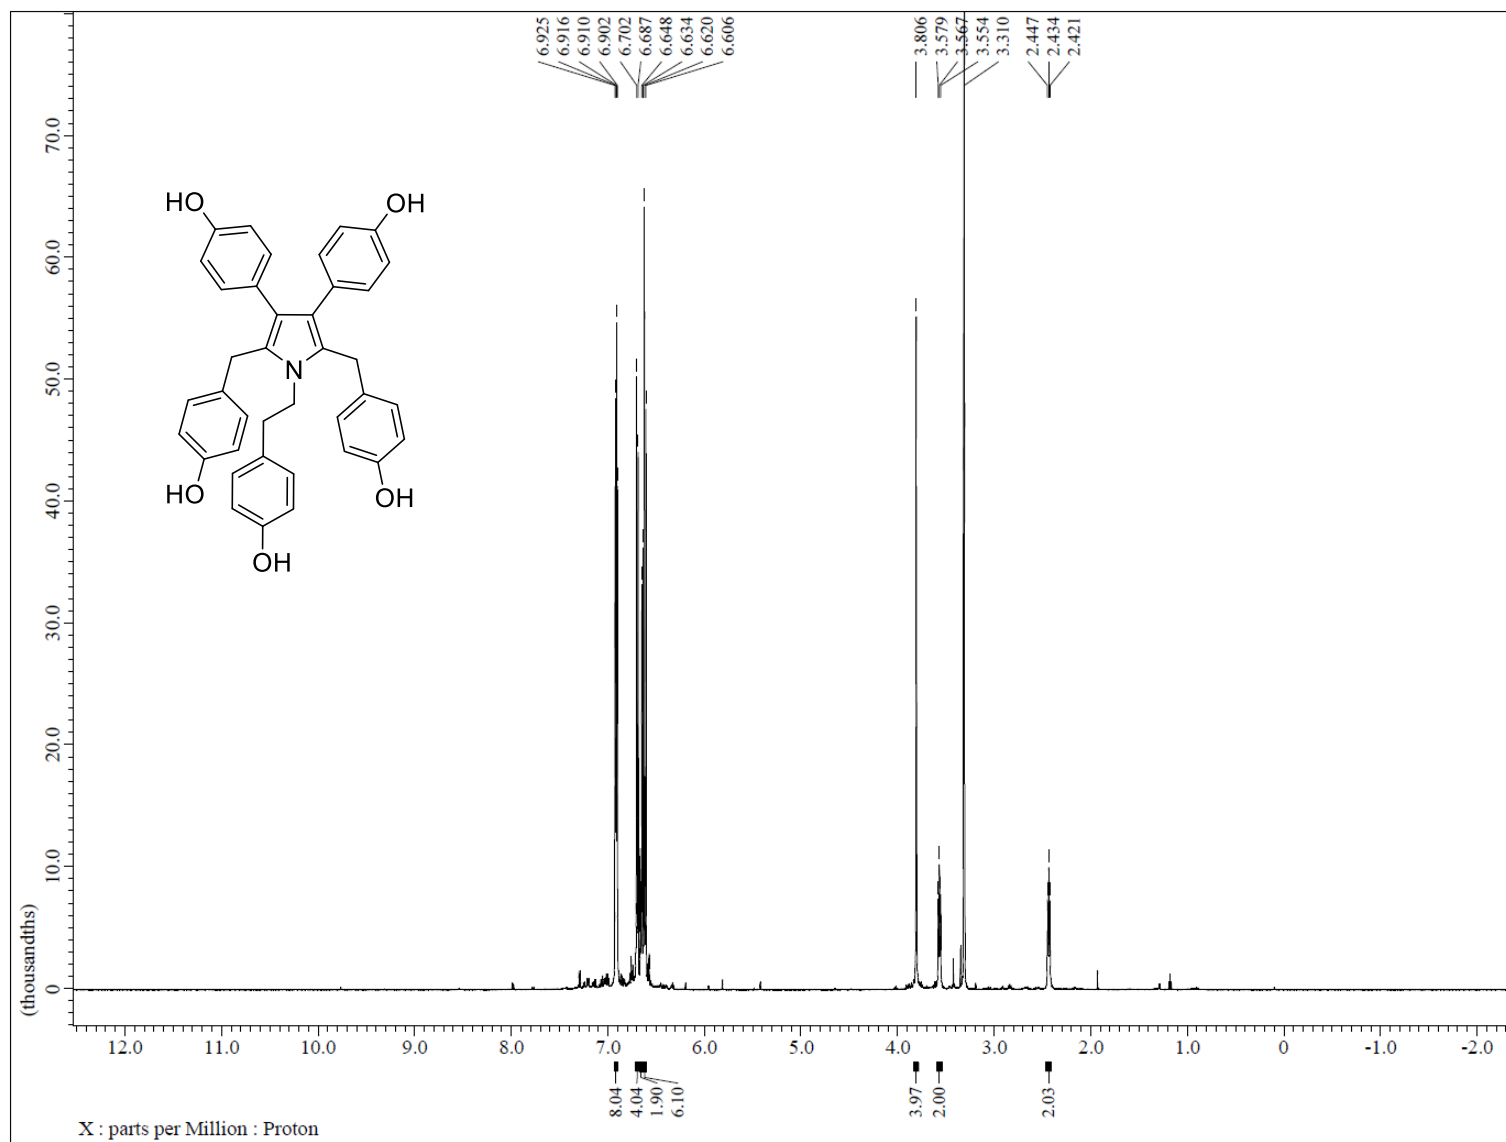

**Figure S6b.**  $^{13}\text{C}$  NMR (methanol- $d_4$ , 150 MHz) spectrum of denigrin E (6)

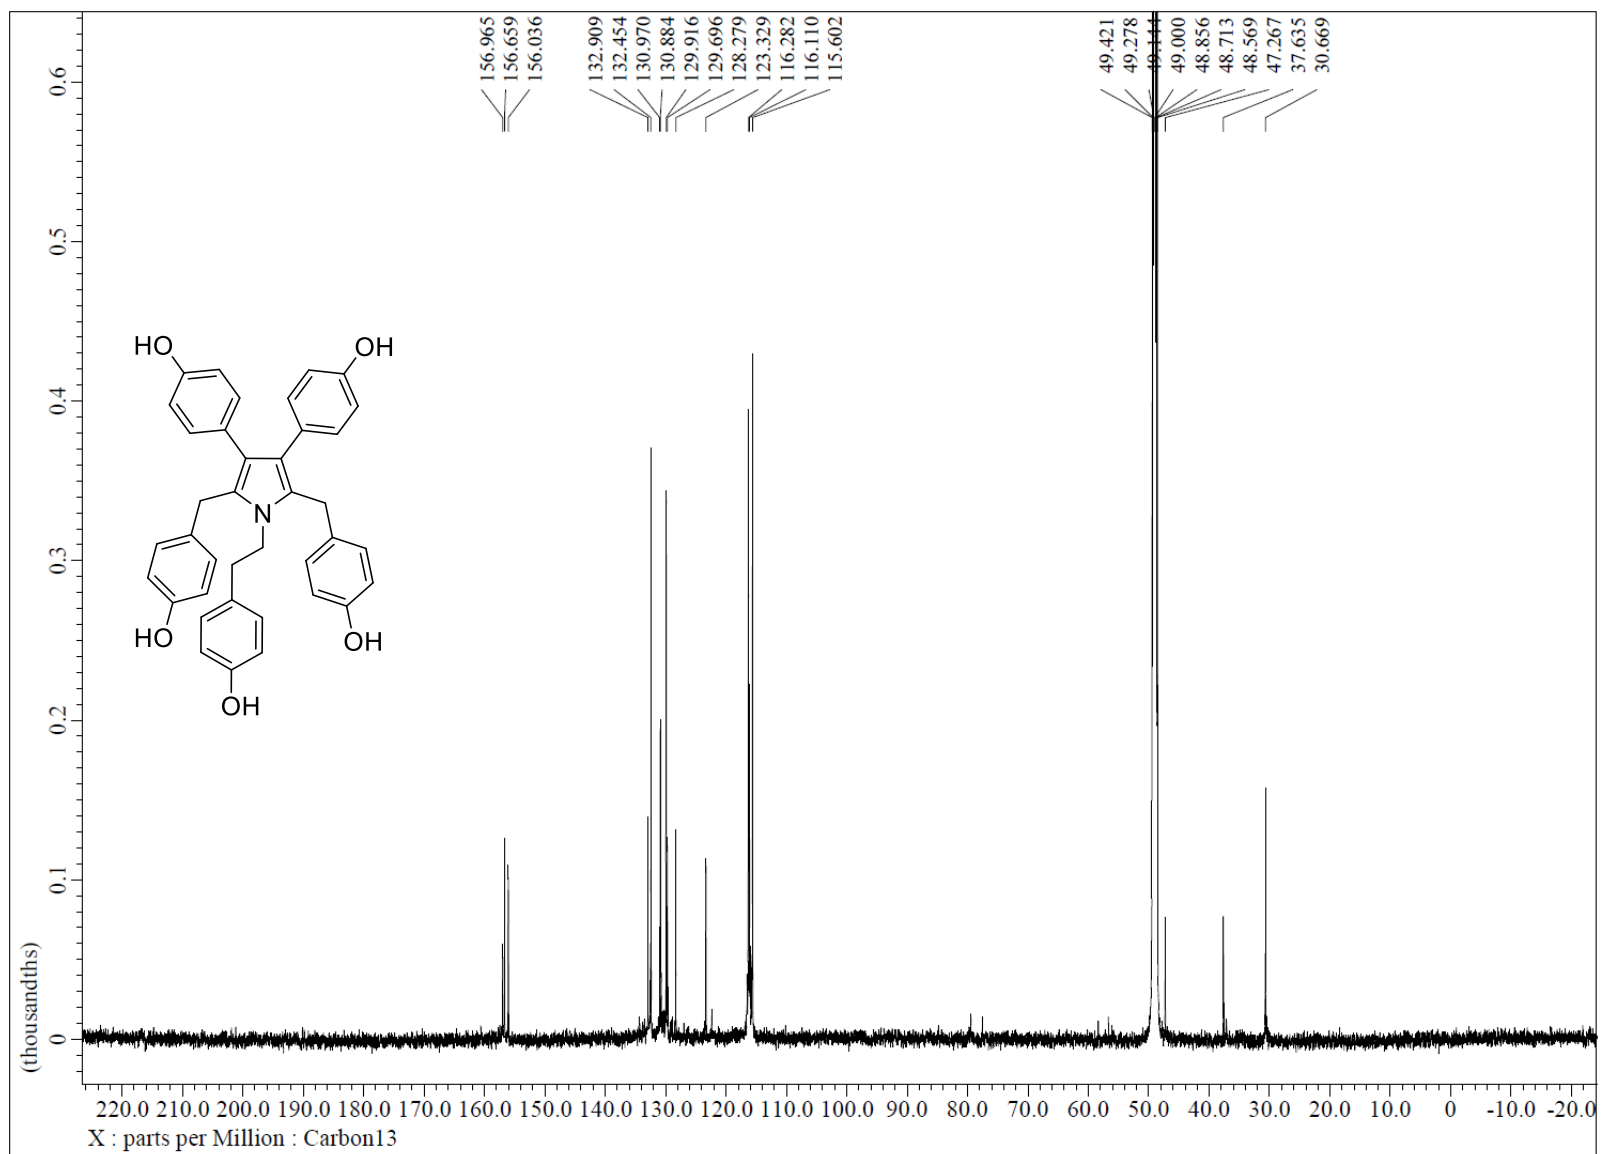

**Figure S6c.**  $^{13}\text{C}$  NMR (methanol- $d_4$ , 150 MHz) spectrum expansion of denigrin E (**6**)

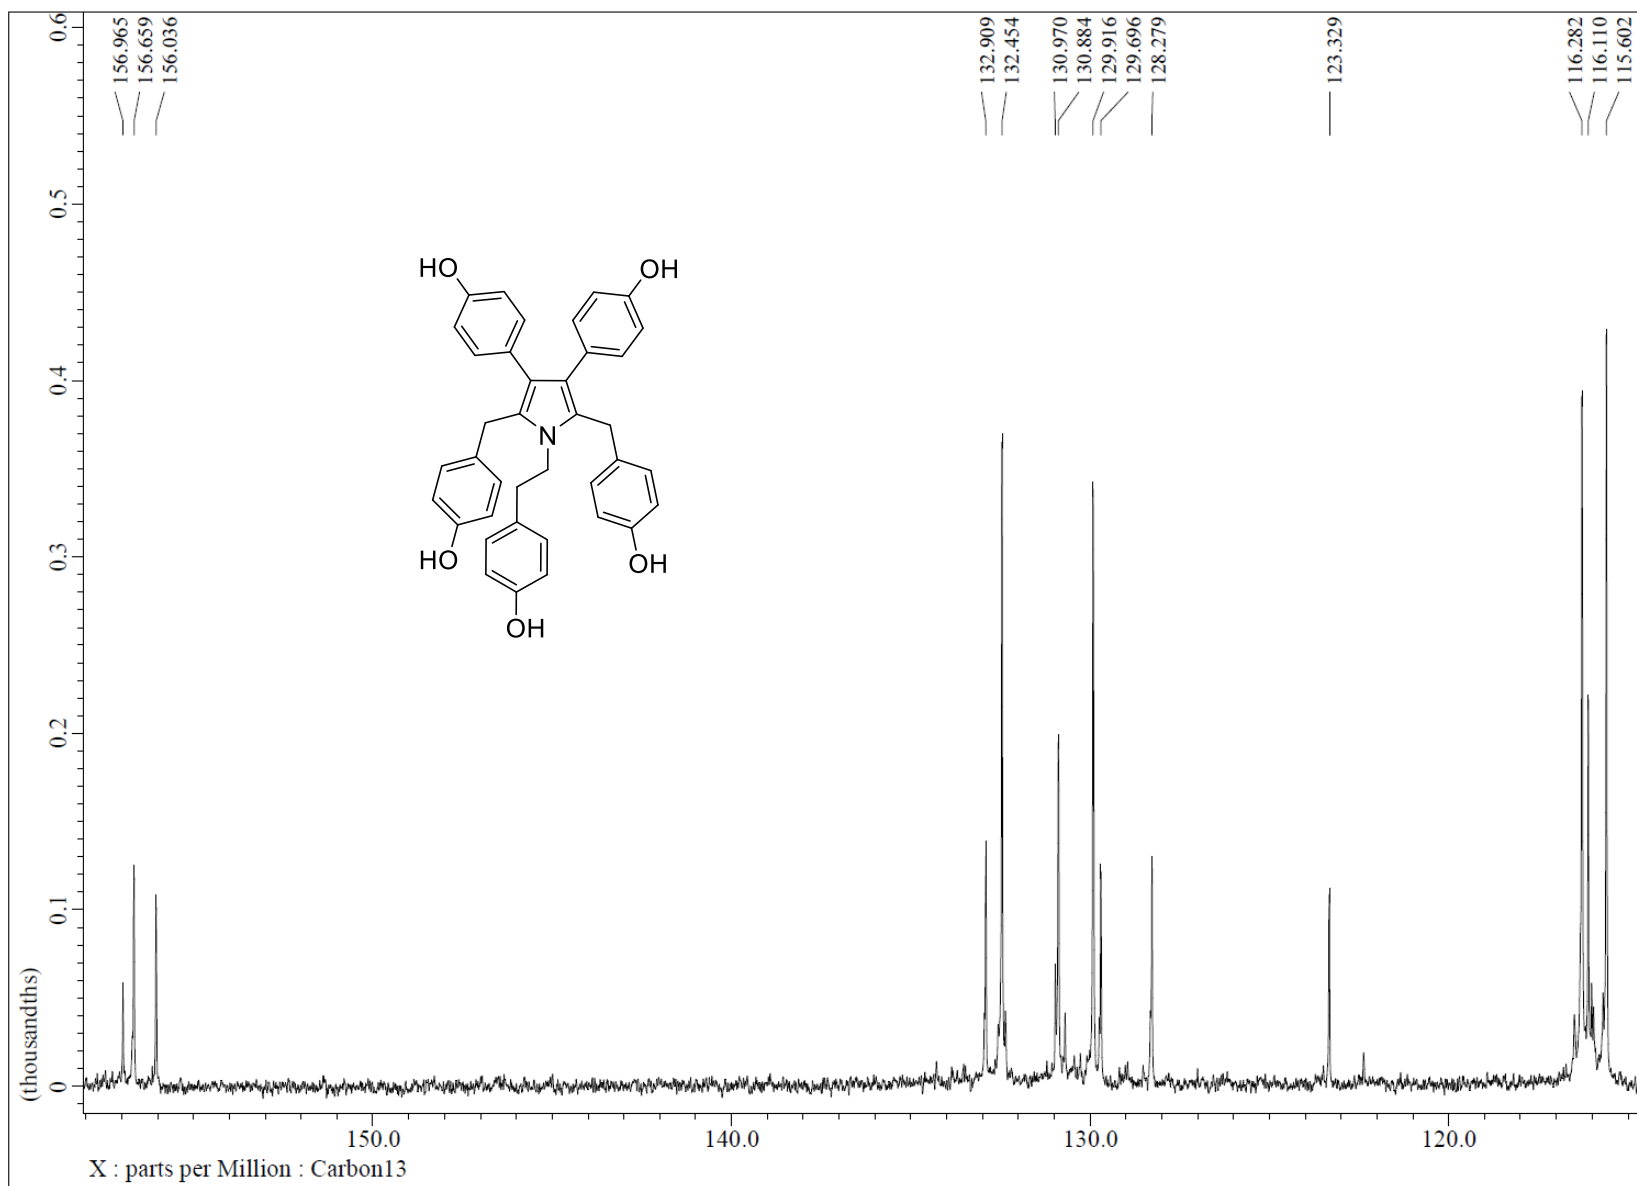

**Figure S7.**  $^1\text{H}$  NMR (methanol- $d_4$ , 600 MHz) spectrum of dictyodendrin C

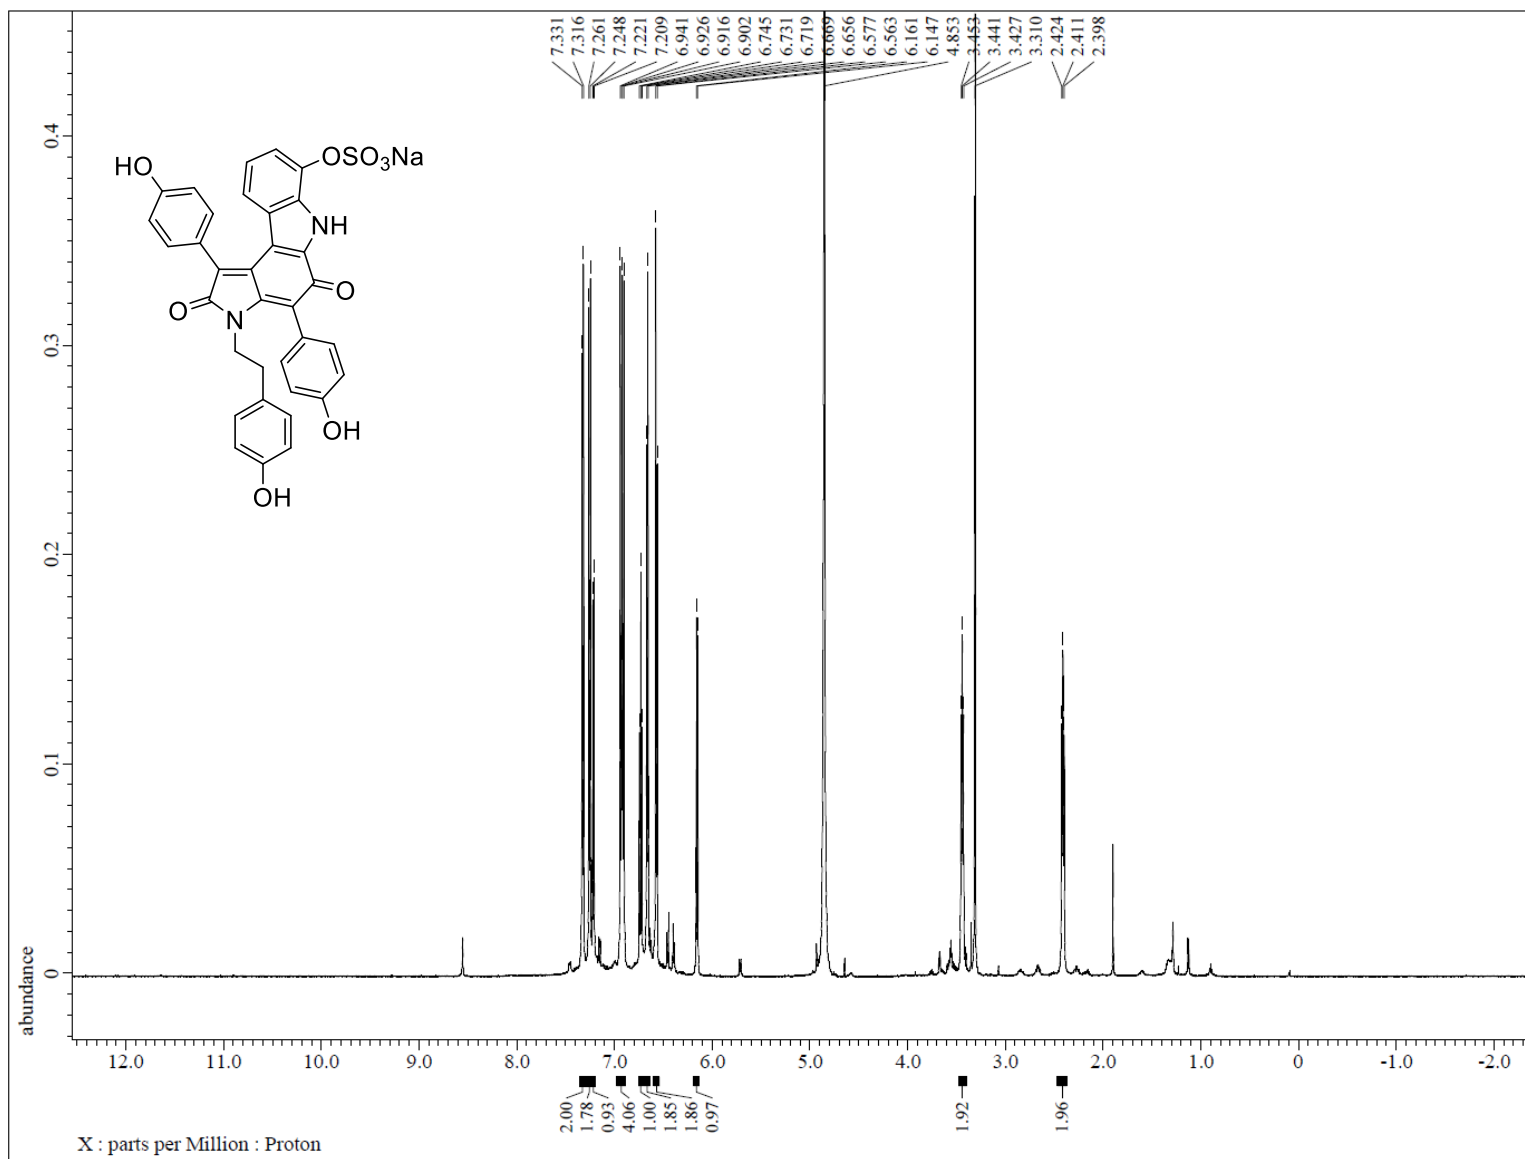

**Figure S8.**  $^1\text{H}$  NMR (methanol- $d_4$ , 600 MHz) spectrum of dictyodendrin D

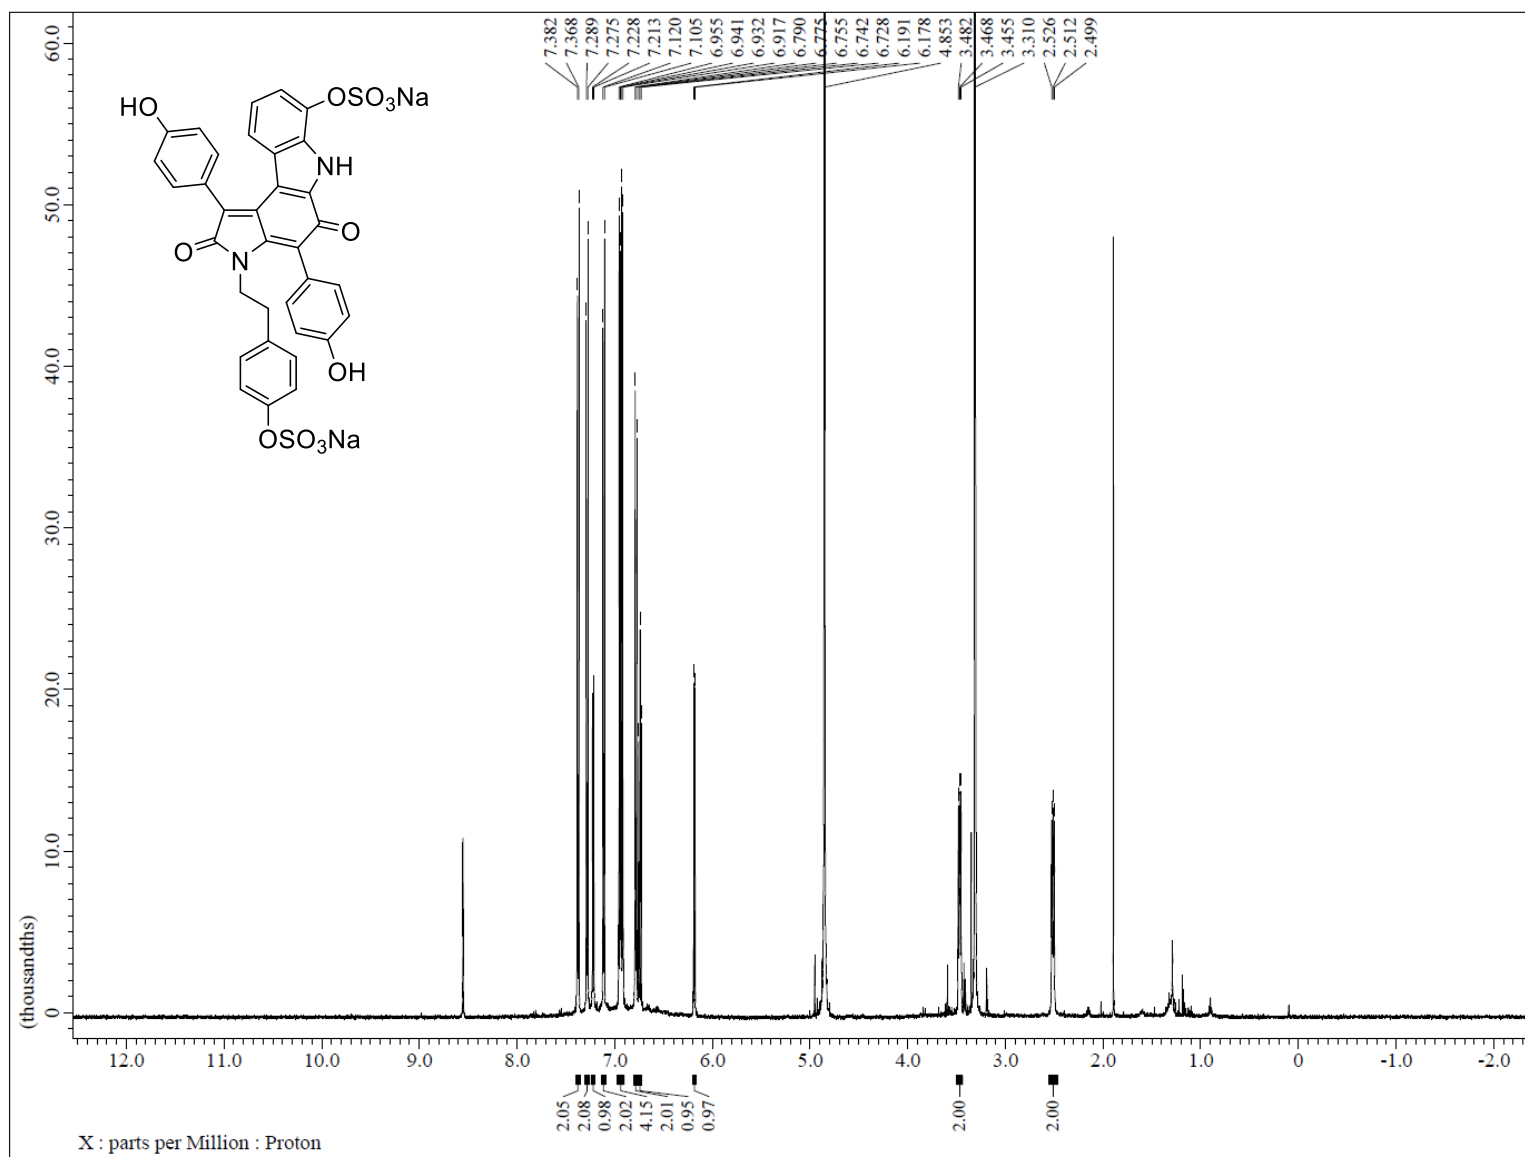

**Figure S9.**  $^1\text{H}$  NMR (methanol- $d_4$ , 600 MHz) spectrum of dictyodendrin F

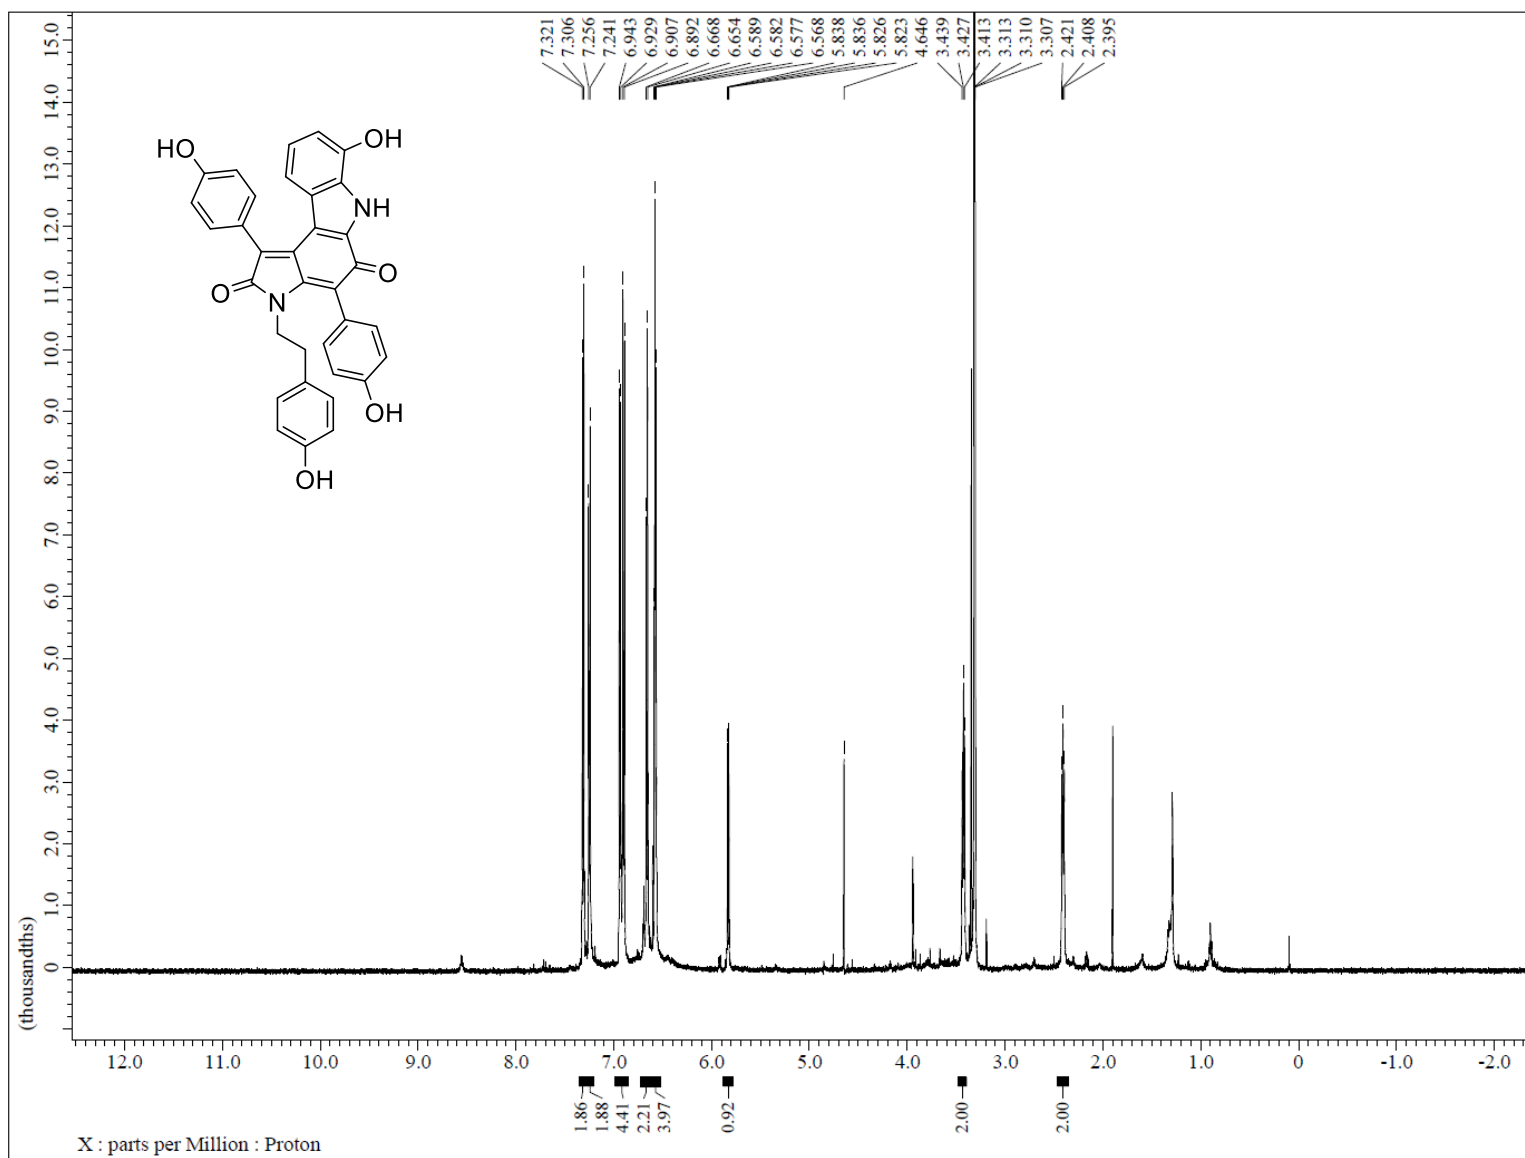

**Figure S10.**  $^1\text{H}$  NMR (methanol- $d_4$ , 600 MHz) spectrum of dactypyrrole A

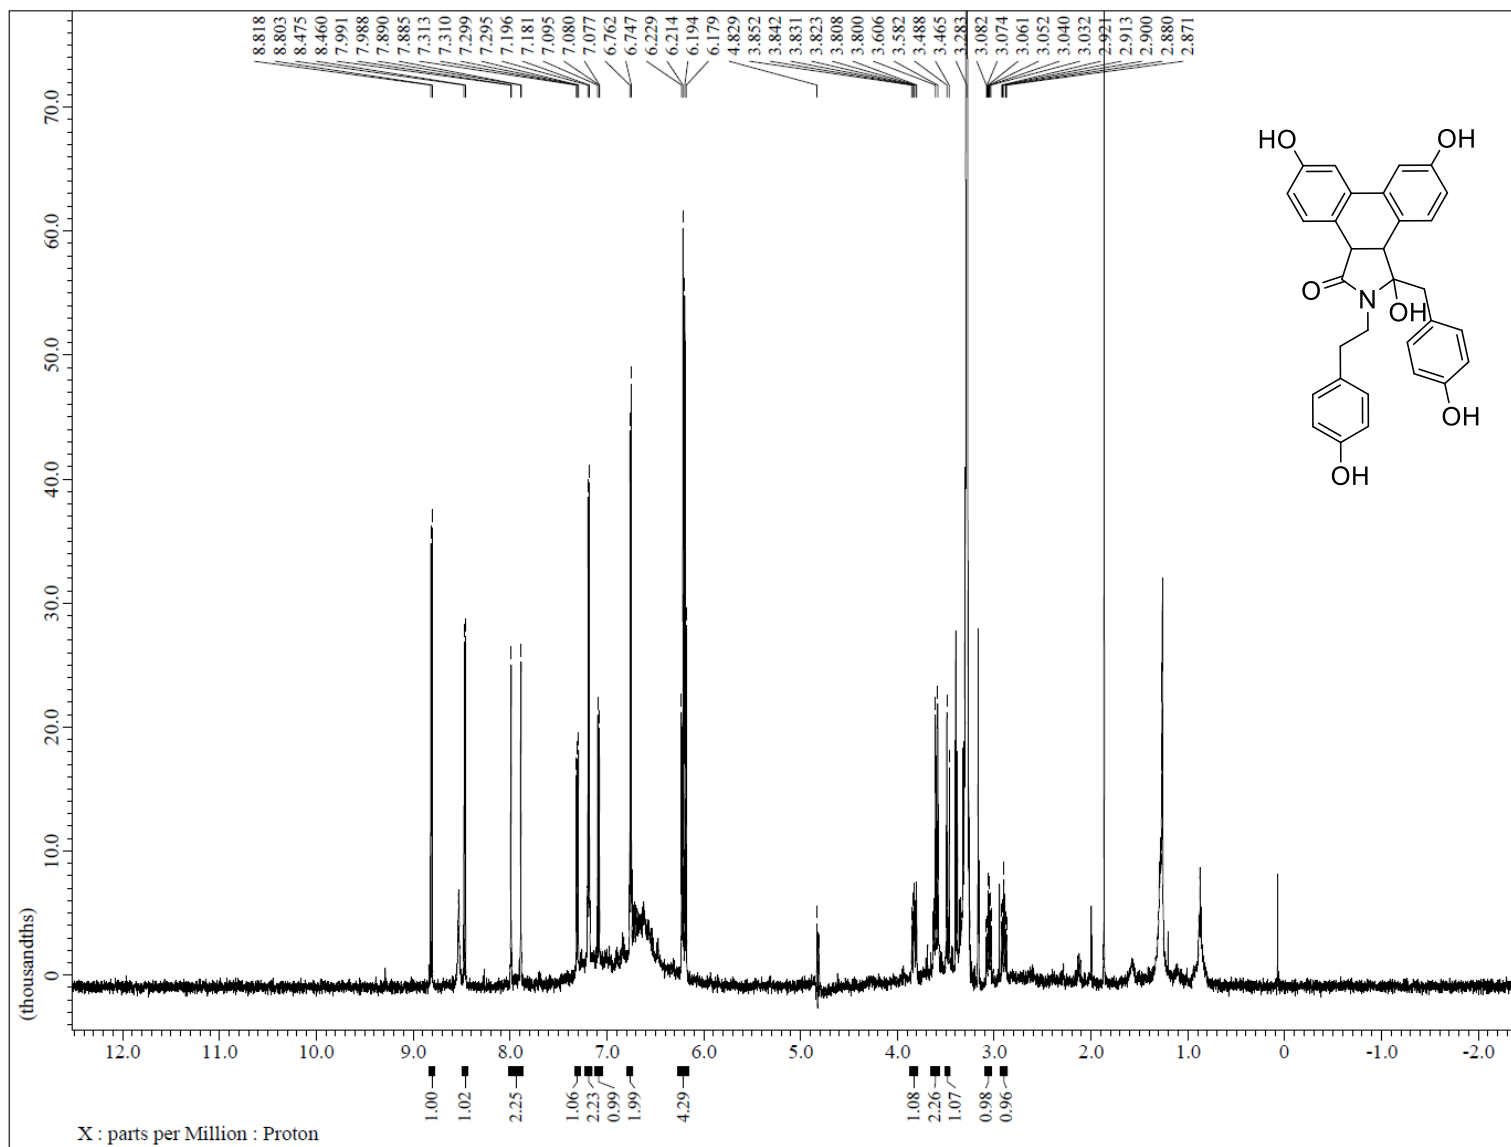

**Figure S11.**  $^1\text{H}$  NMR (methanol- $d_4$ , 600 MHz) spectrum of lamellarin O1

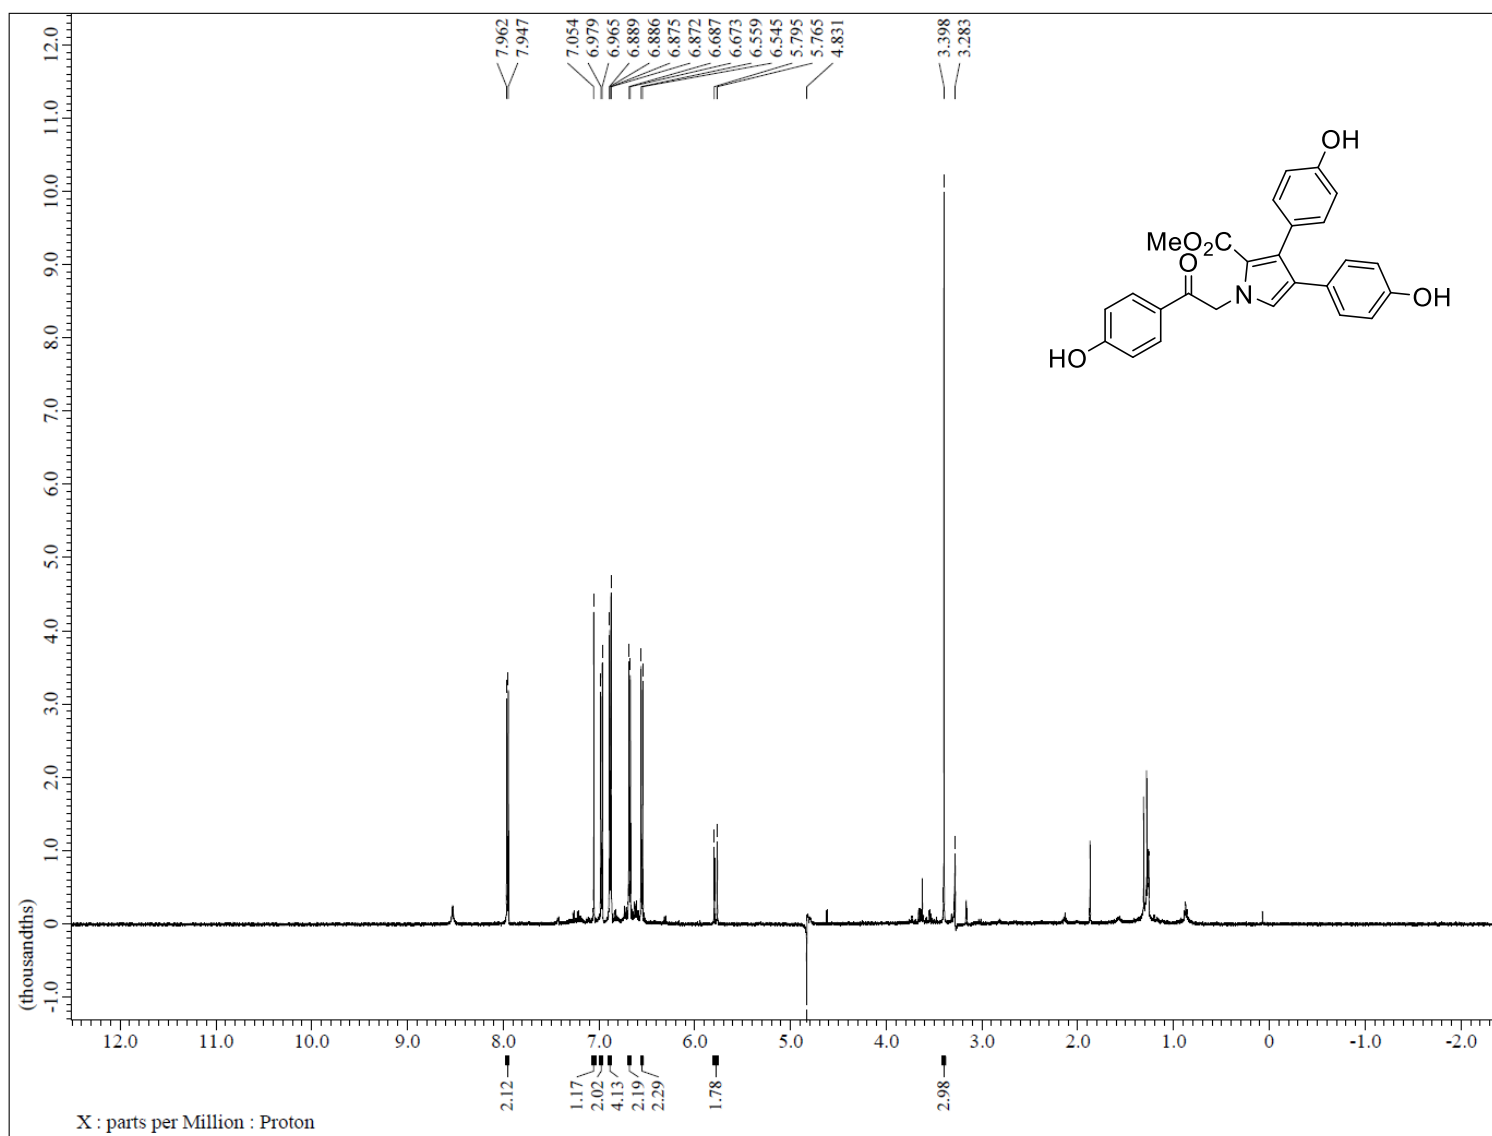

**Table S6.** Cytotoxicity assay - IC<sub>50</sub> values for compounds **1-6**, dictyodendrin C, D, and F, dactylpyrrole A and lamellarin O1

| Compound        | IC <sub>50</sub> (μM) |
|-----------------|-----------------------|
| 1               | > 100                 |
| 2               | 78                    |
| 3               | > 100                 |
| 4               | > 100                 |
| 5               | > 100                 |
| 6               | > 100                 |
| Dictyodendrin C | > 100                 |
| Dictyodendrin D | 60                    |
| Dictyodendrin F | 48                    |
| Dactylpyrrole A | > 100                 |
| Lamellarin O1   | > 100                 |
